# Supplementary material for: The oncogenic axis YAP/MYC/EZH2 impairs PTEN tumor suppression activity enhancing lung tumorigenicity
Source: Springer Nature journal article supplement (doi:10.1038/s41420-024-02216-8), 2024-10-25

Fig. S1

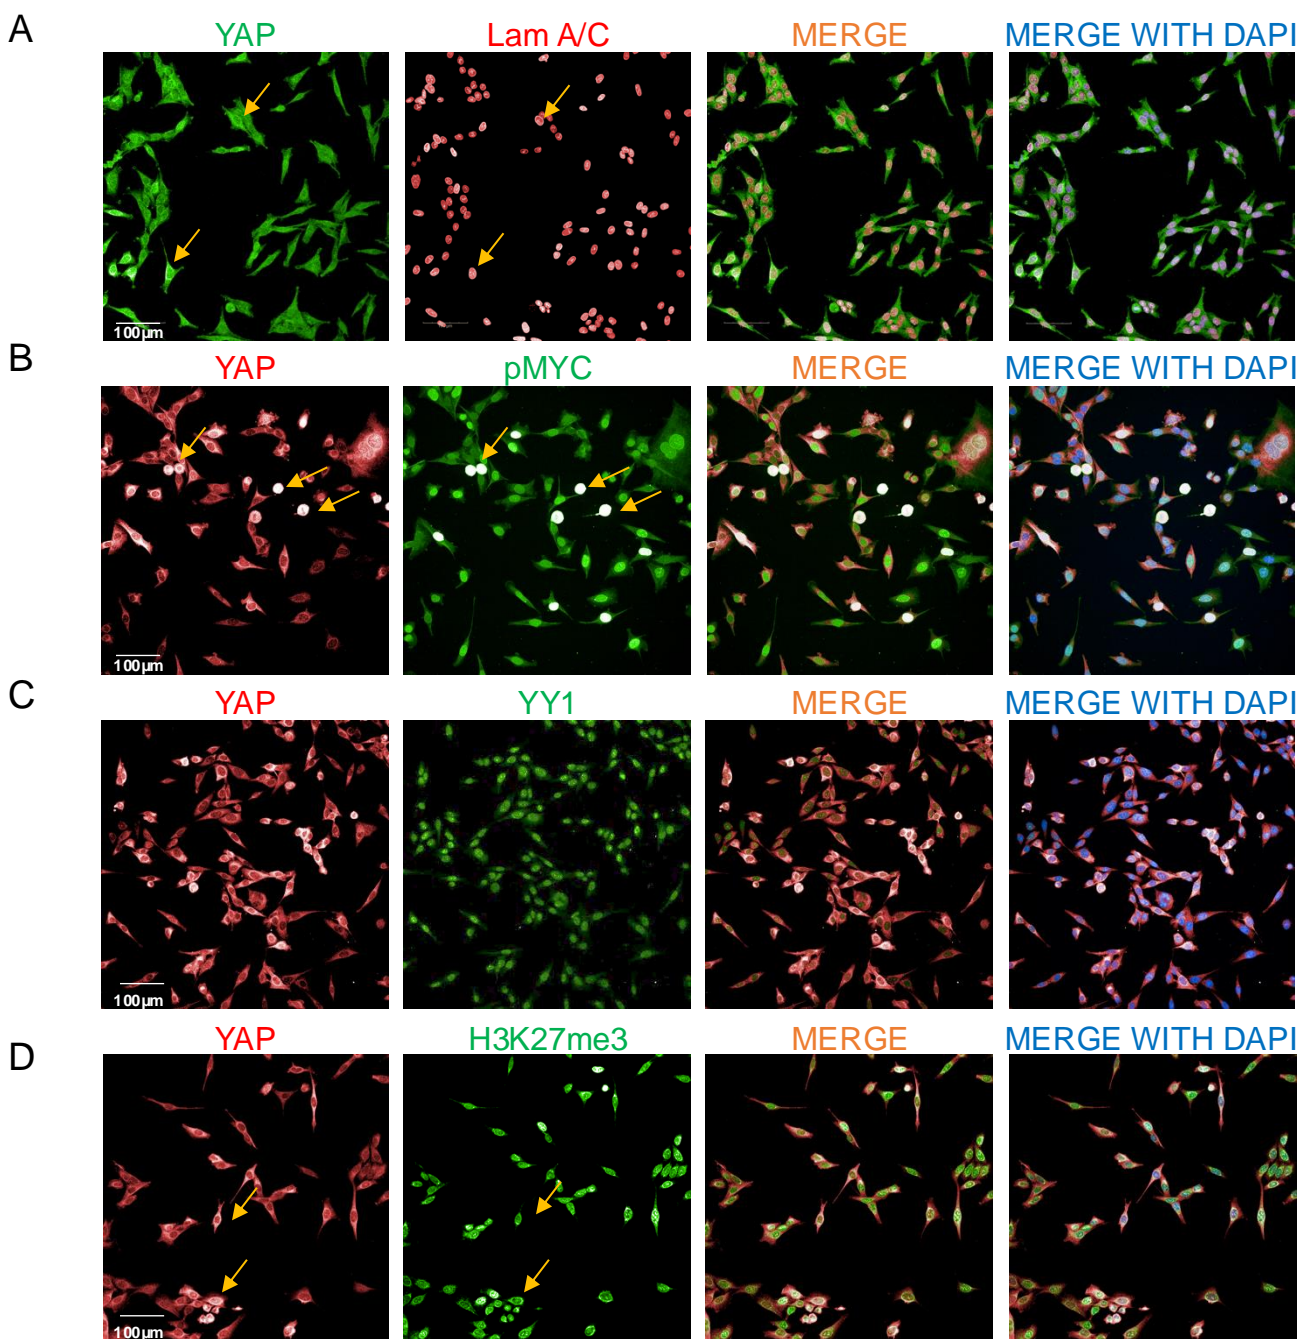

**Fig. S2**

**A**

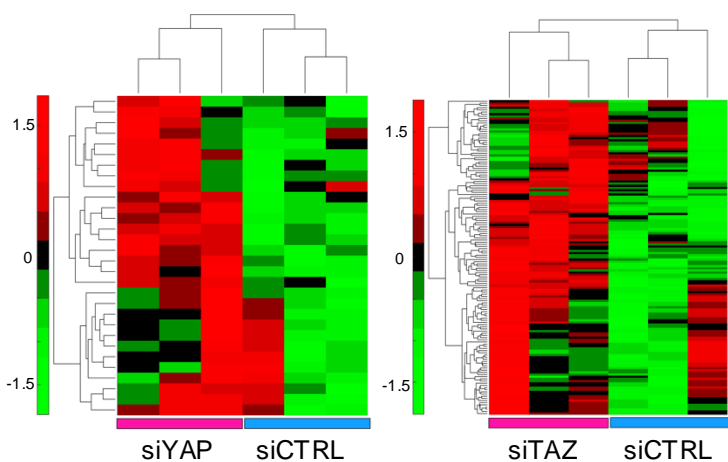

**B**

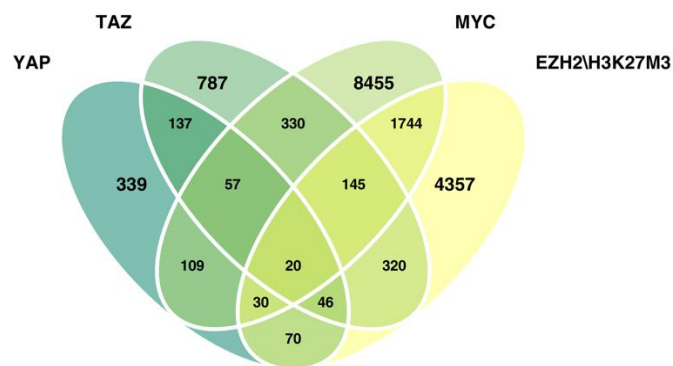

**C**

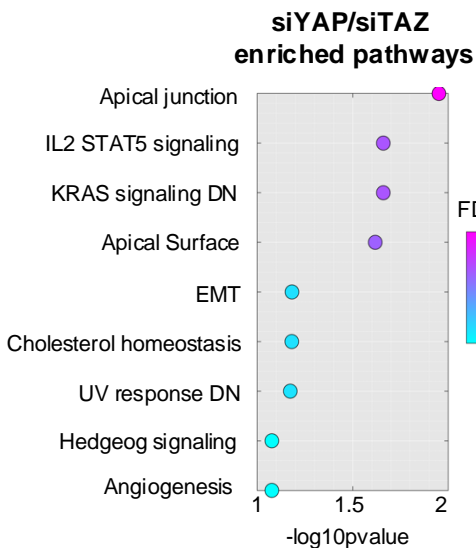

**D**

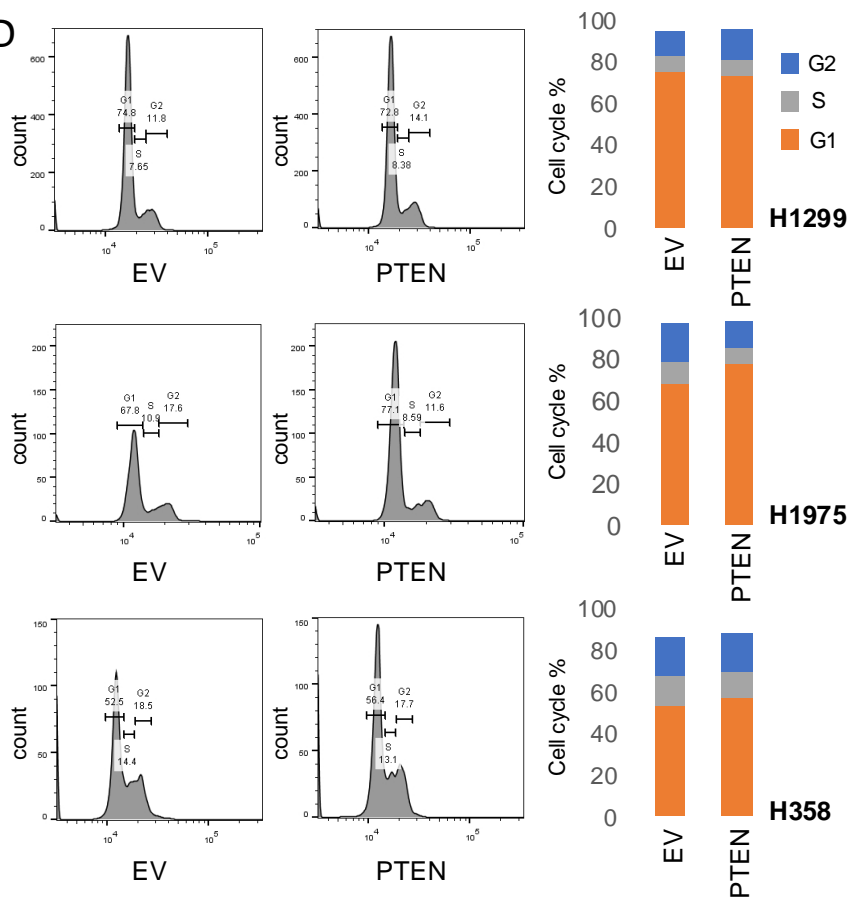

**E**

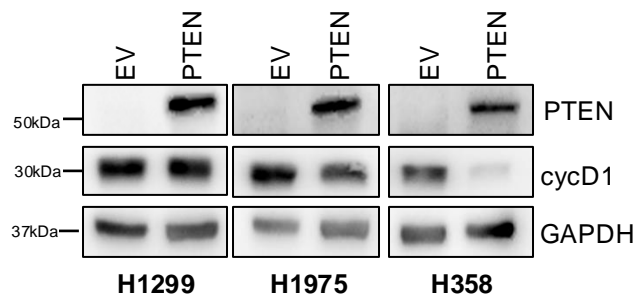

**Fig. S3**

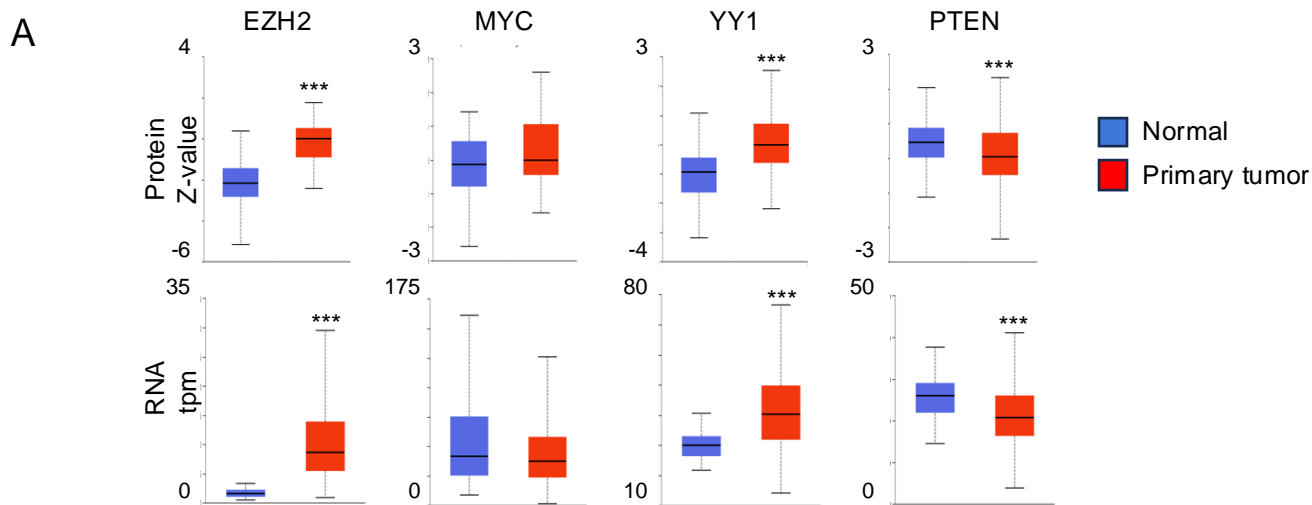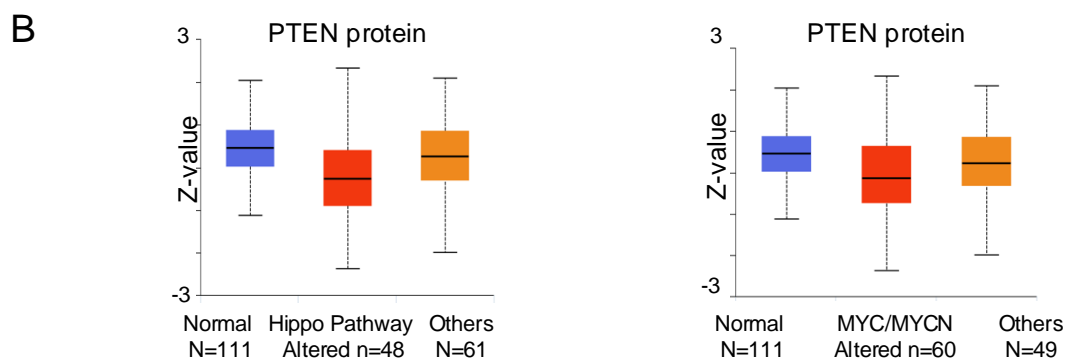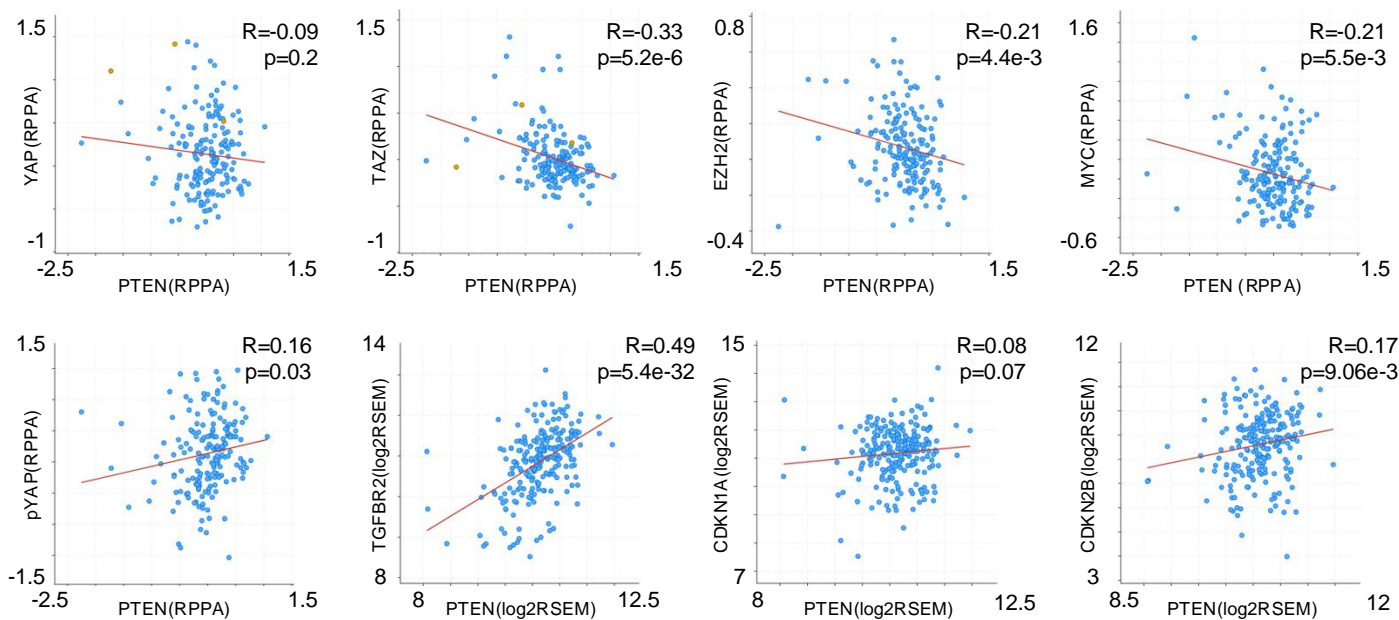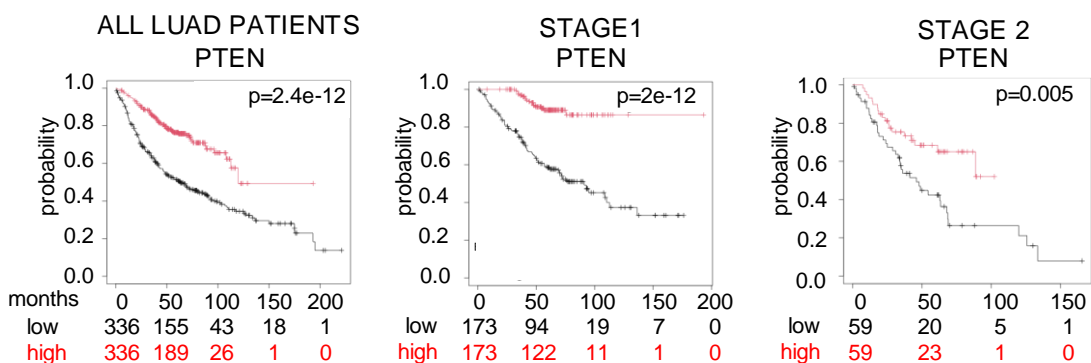

**Fig. S4**

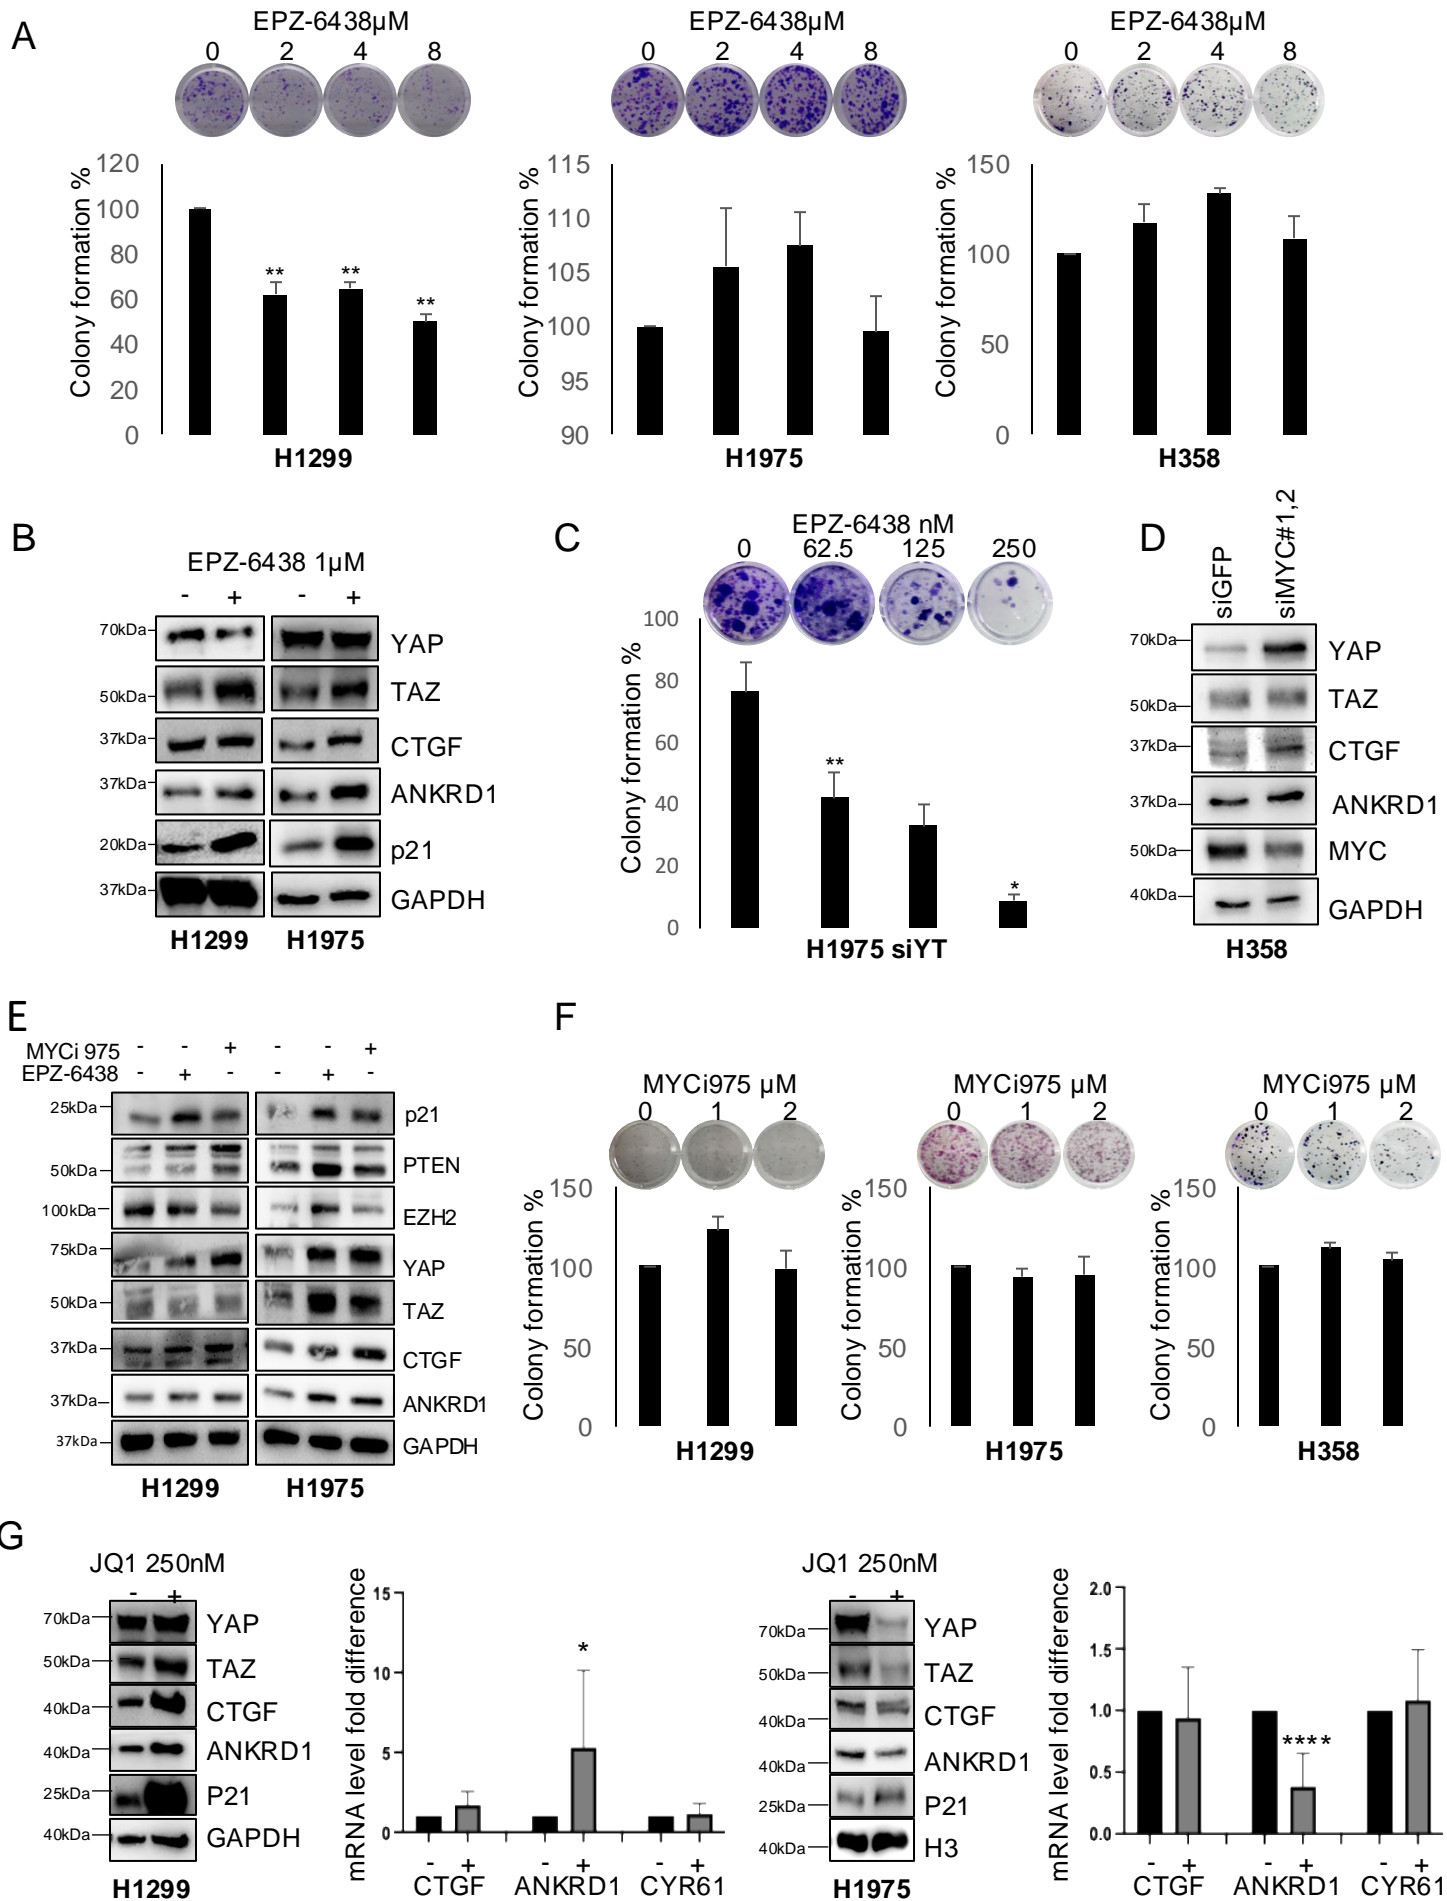

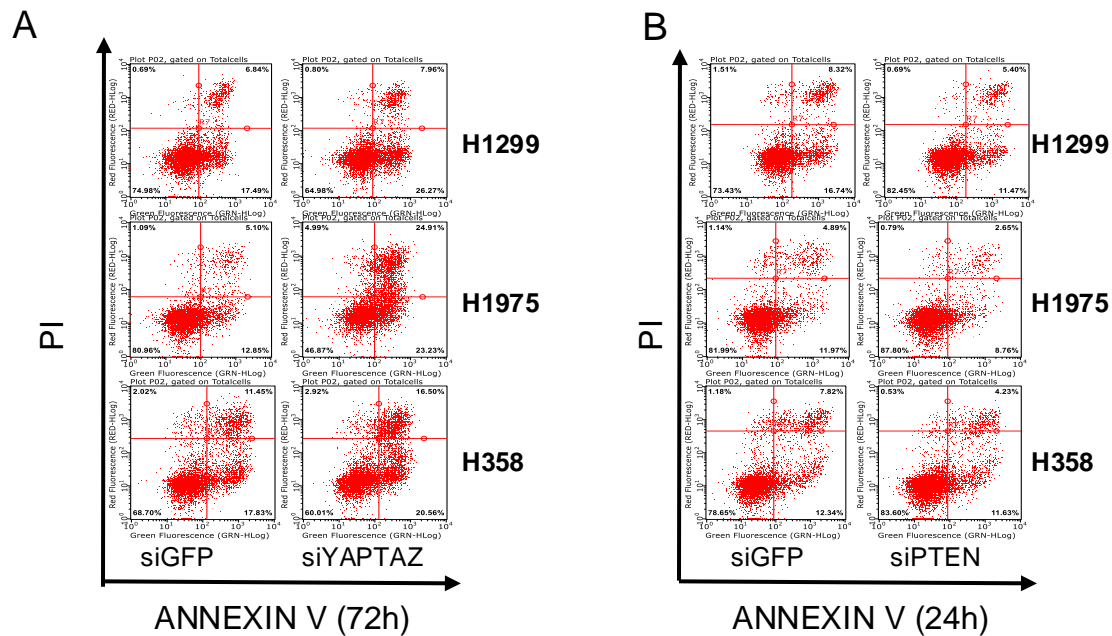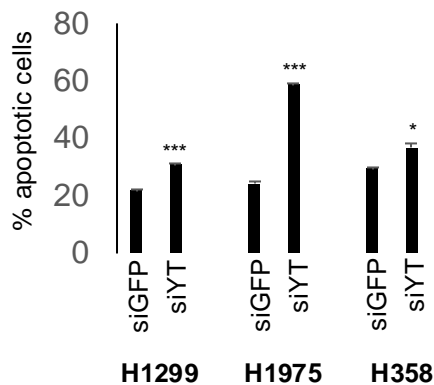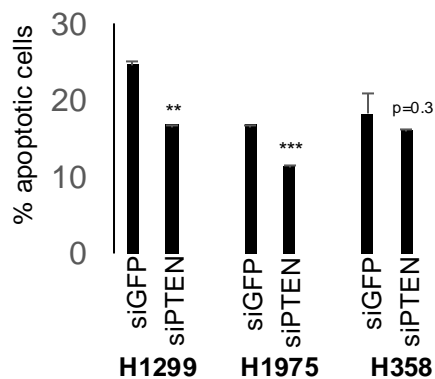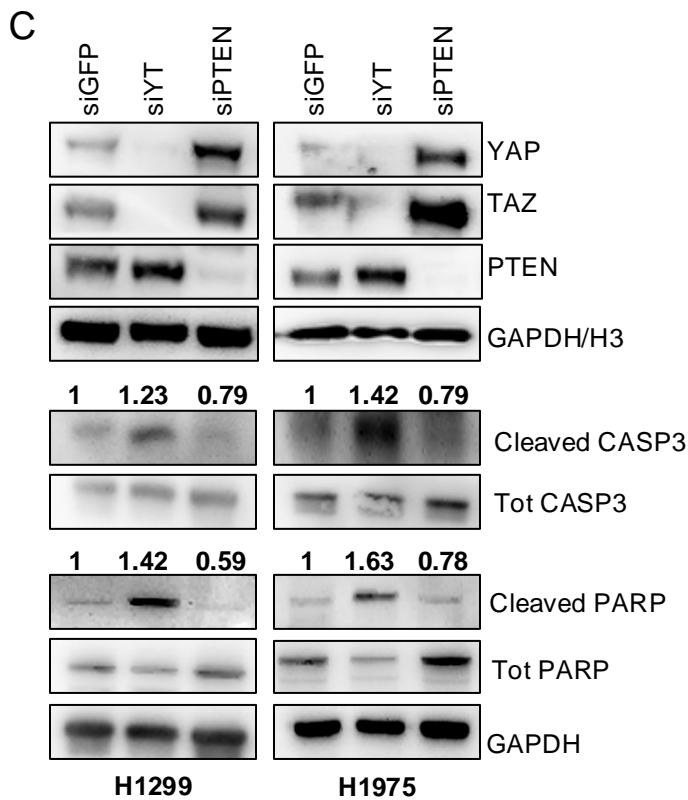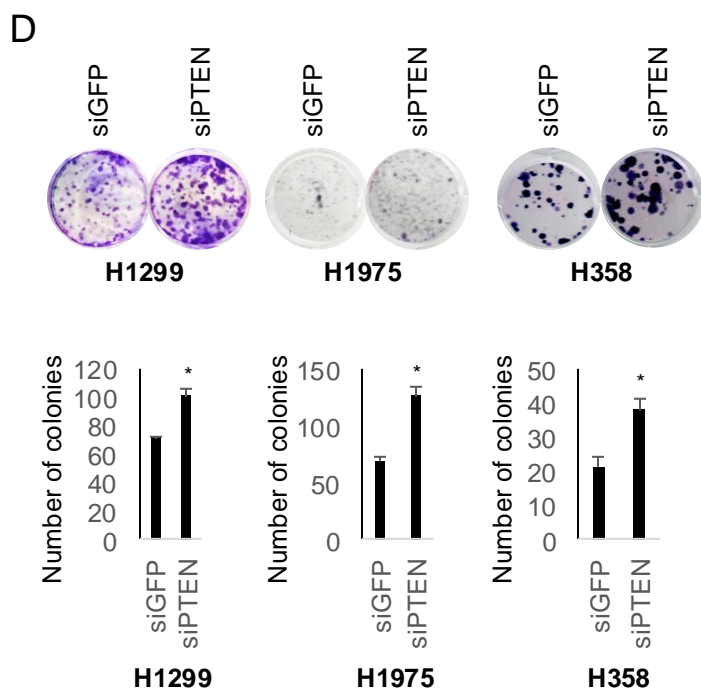

**Fig. S6**

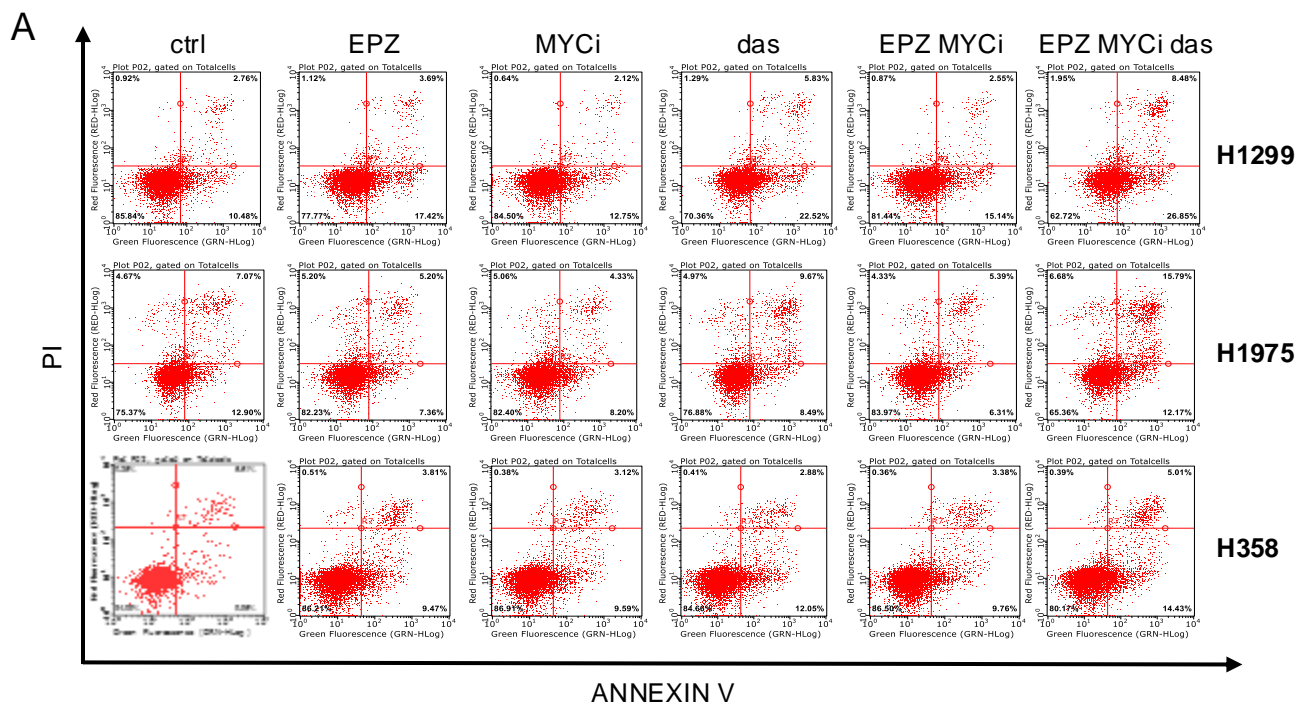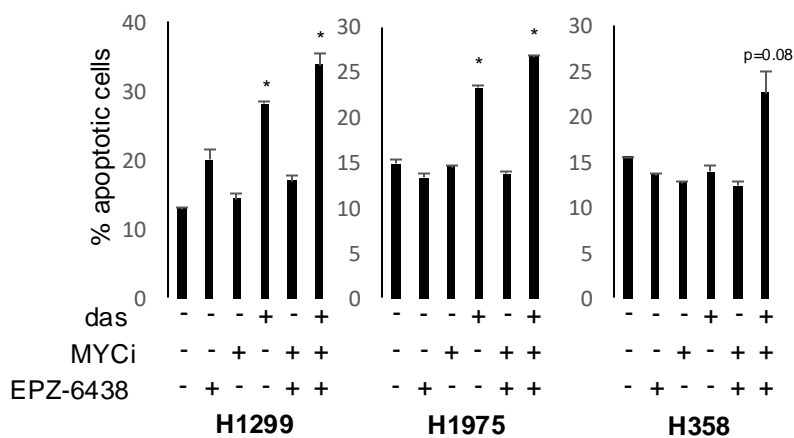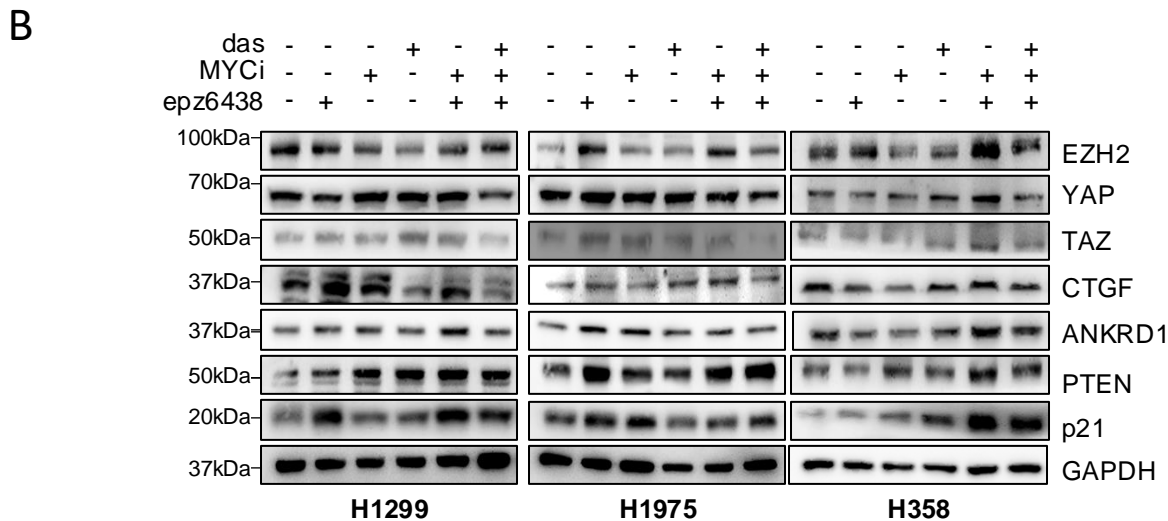

Fig. S7

A

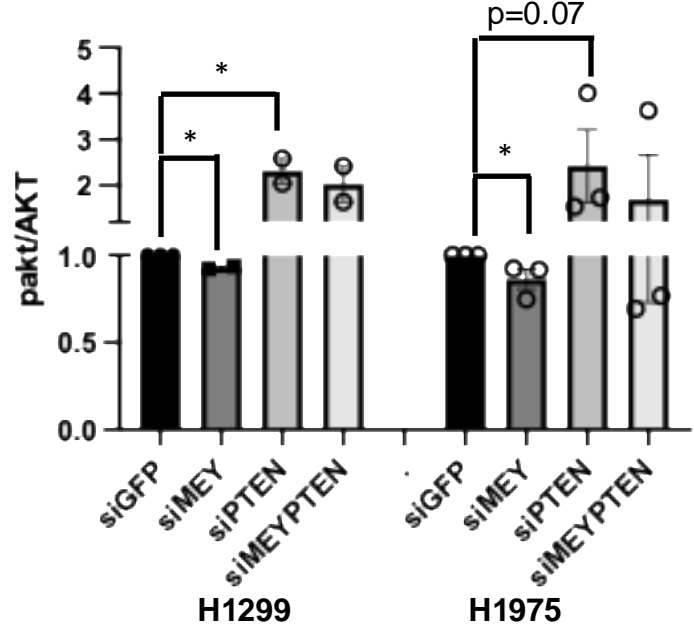

OXPHOS Parameters

B

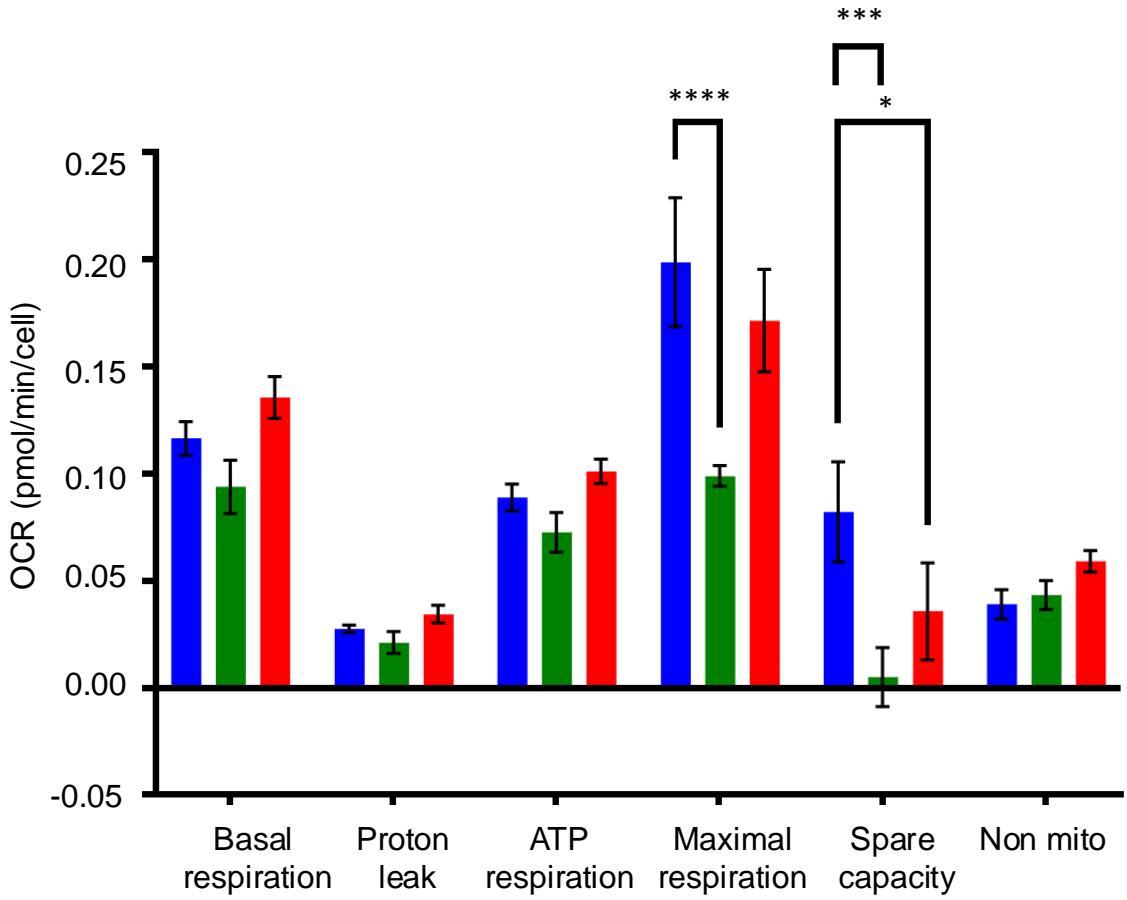

Fig. S8

### PTEN differential plot

A

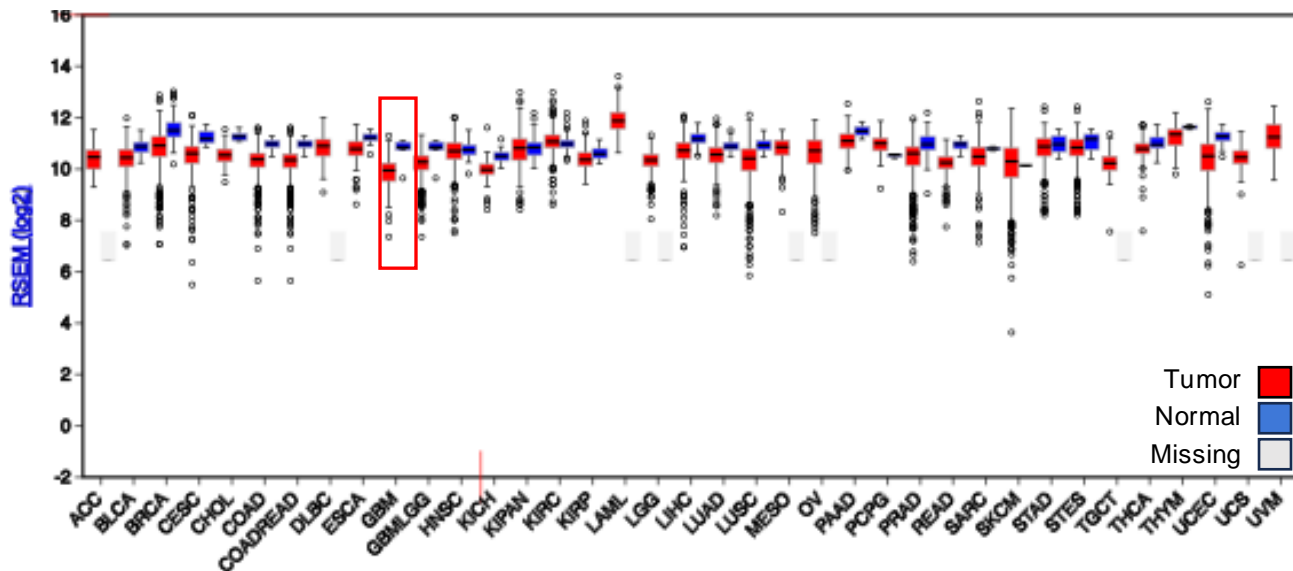

### B PTEN genetic alteration frequency

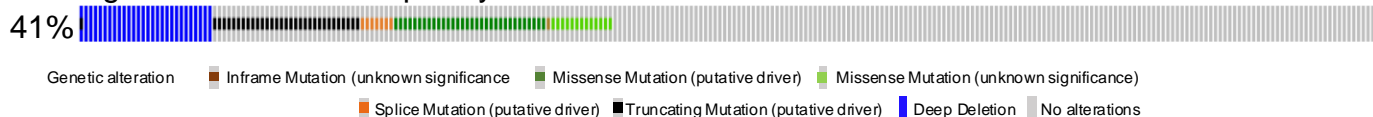

C

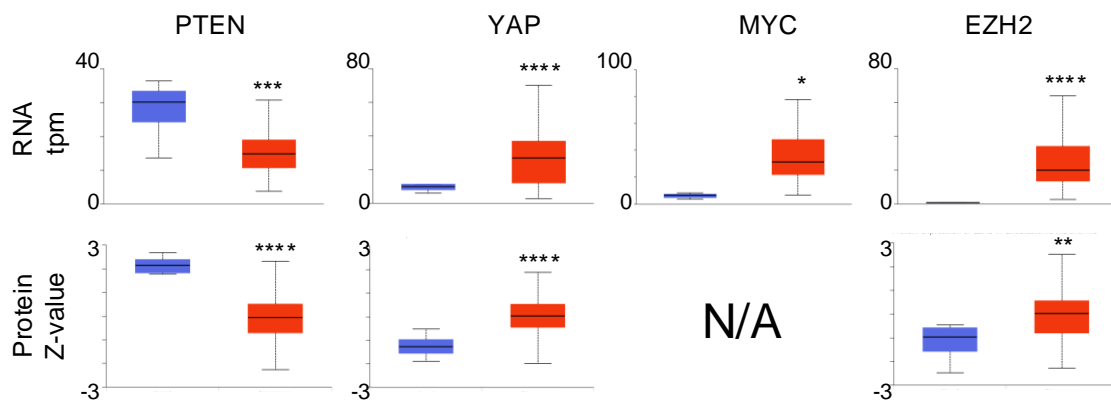

D

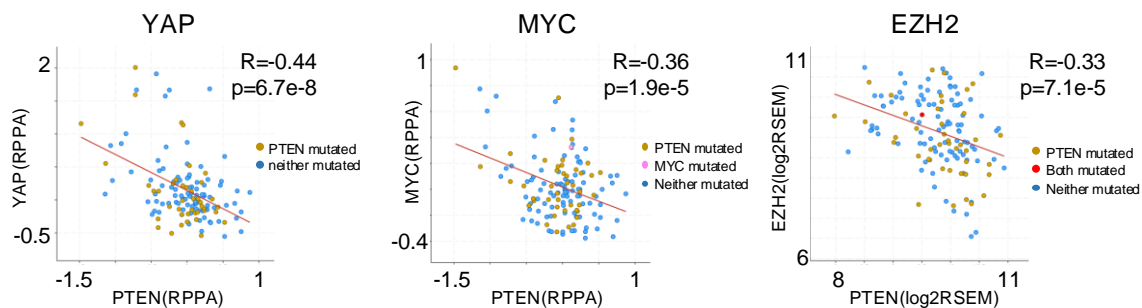

E

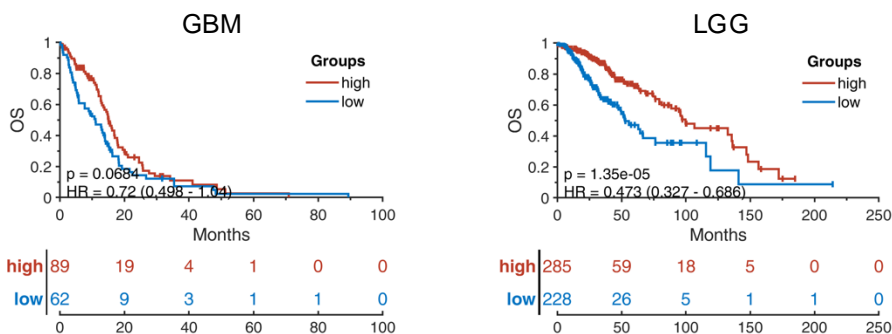

**Fig. S9 (PANEL 1C)**

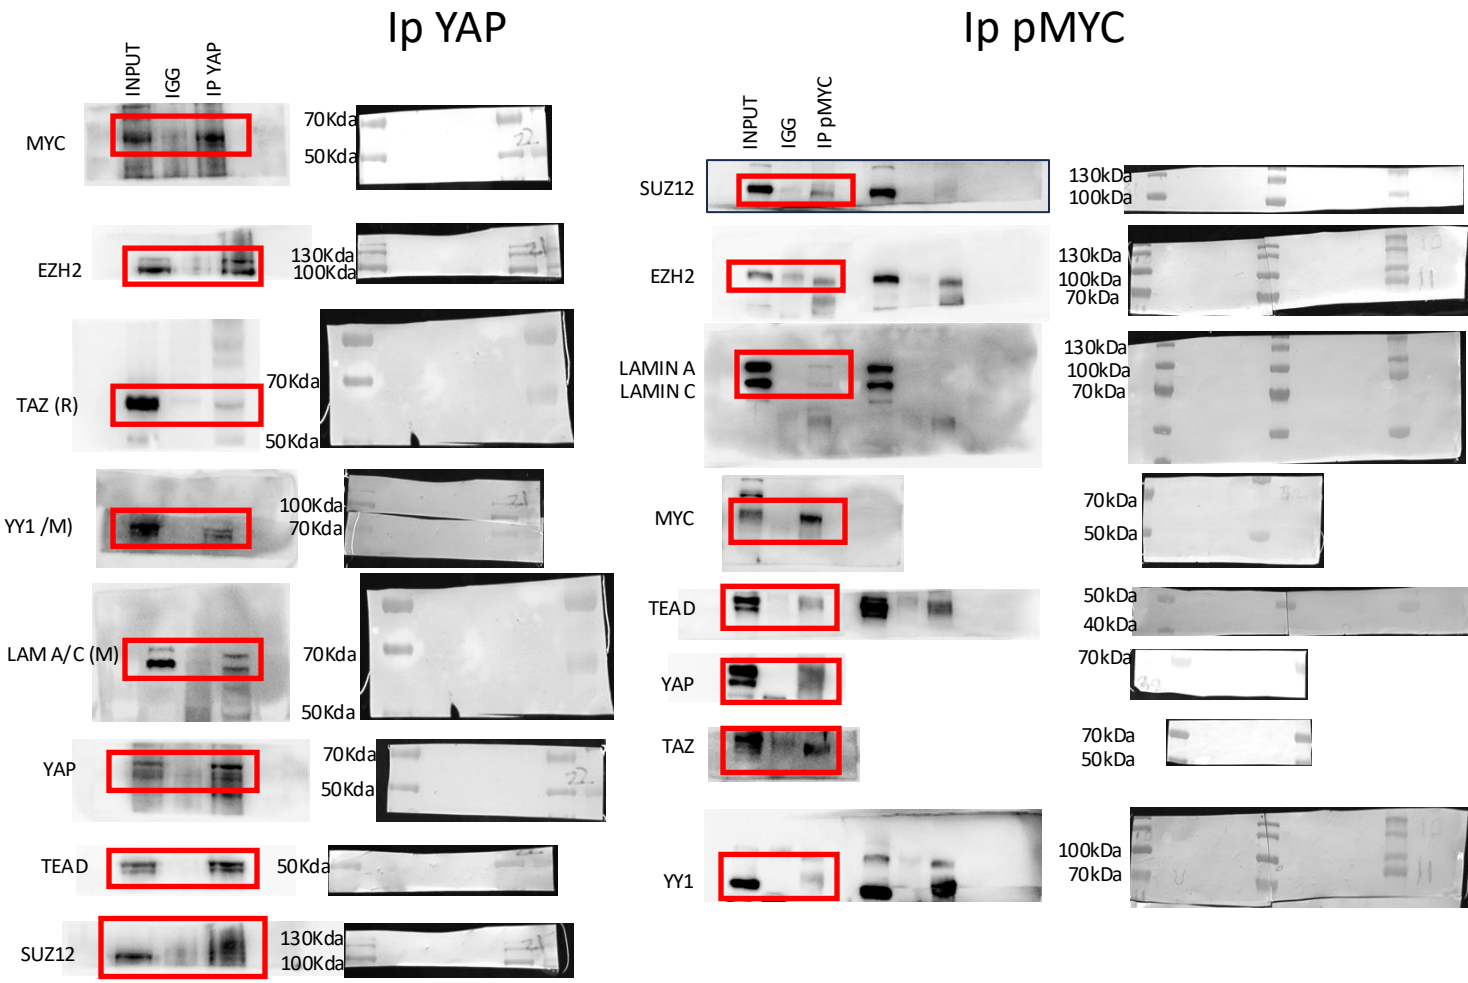

### Ip YY1

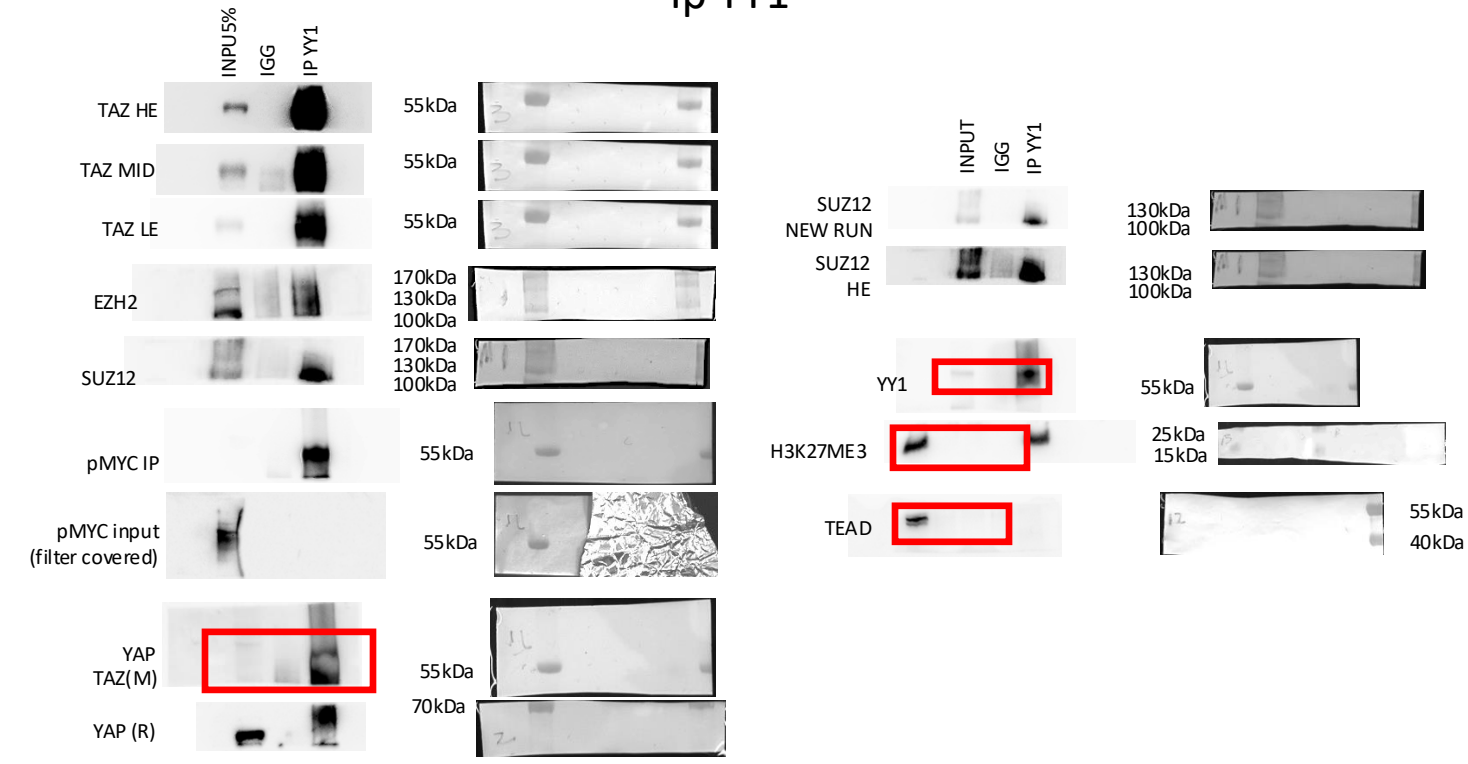

**Fig. S10**

**A**

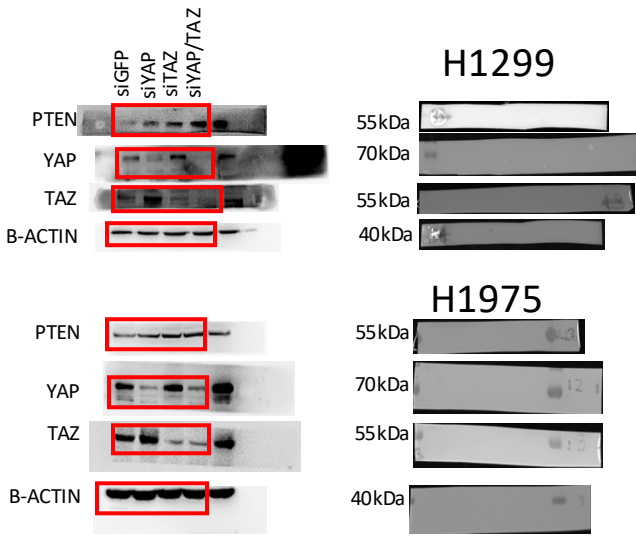

**B**

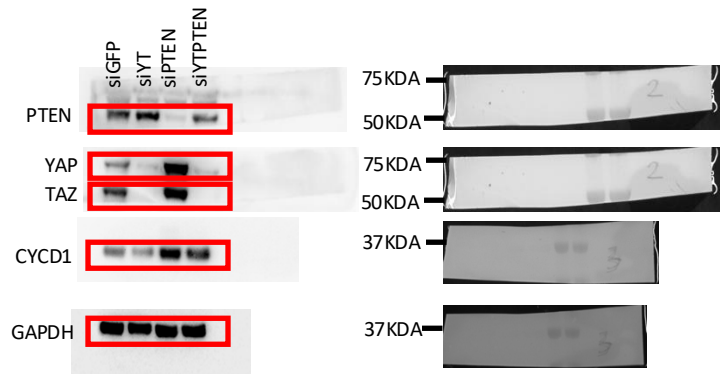

**C**

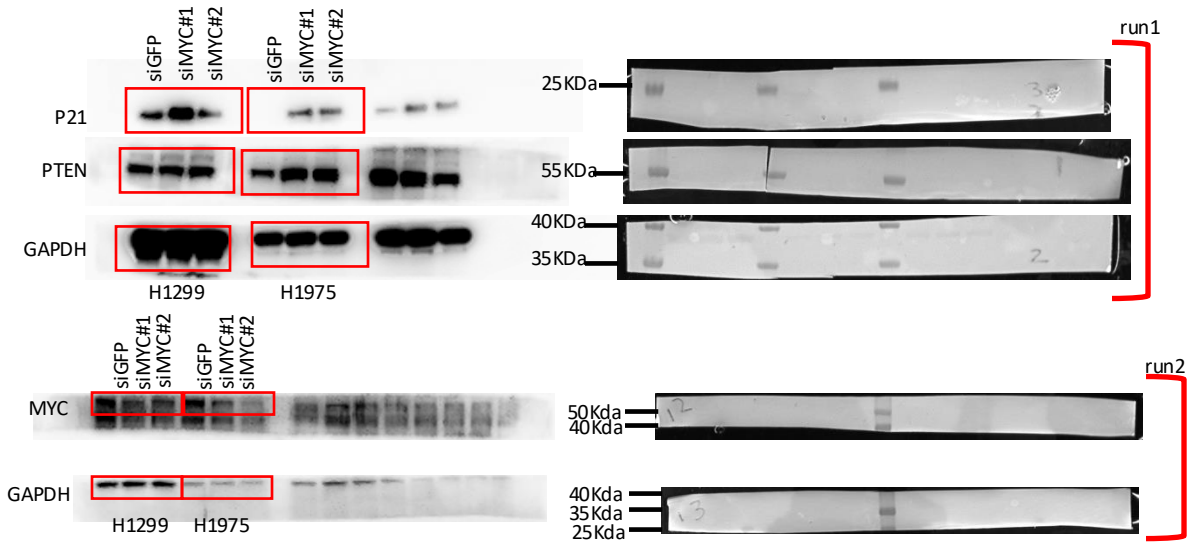

**D**

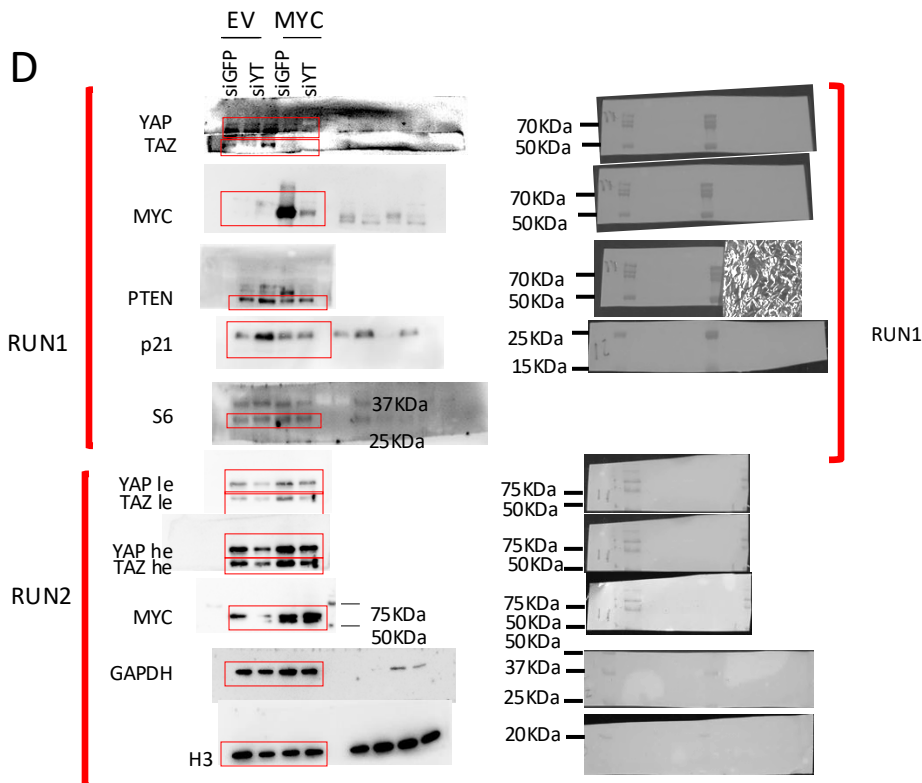

**Fig. S11**

**A**

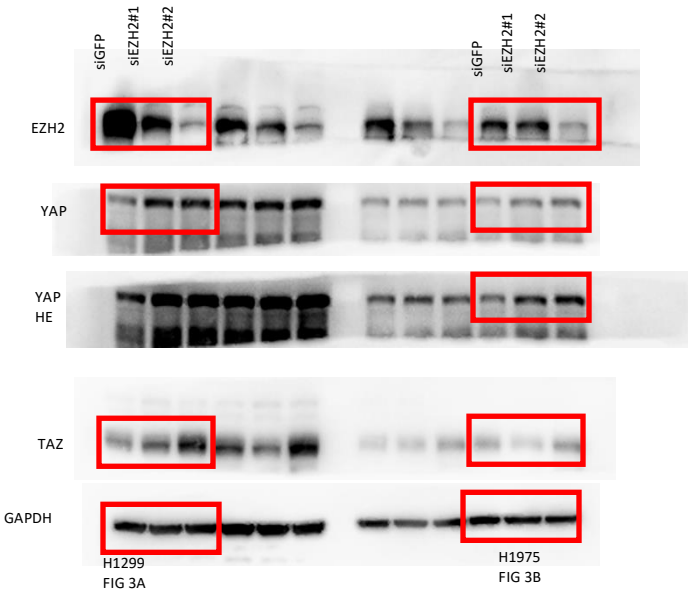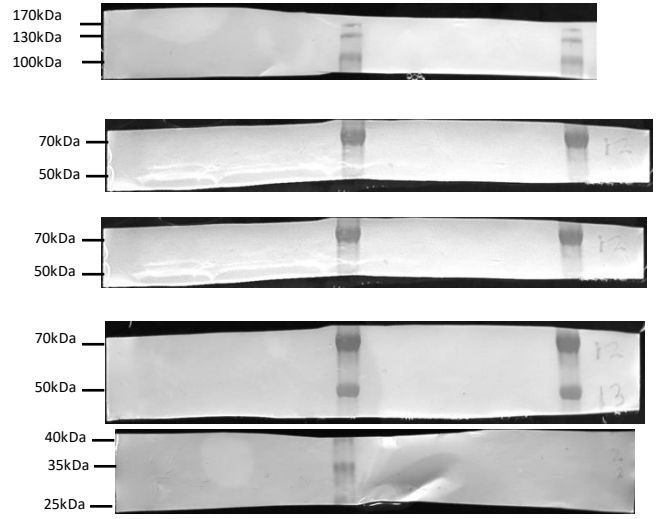

**B**

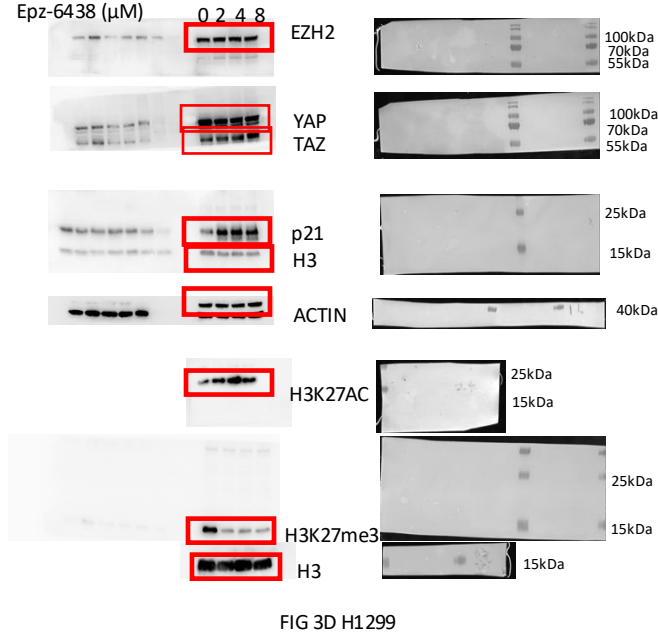

FIG 3D H1299

**C**

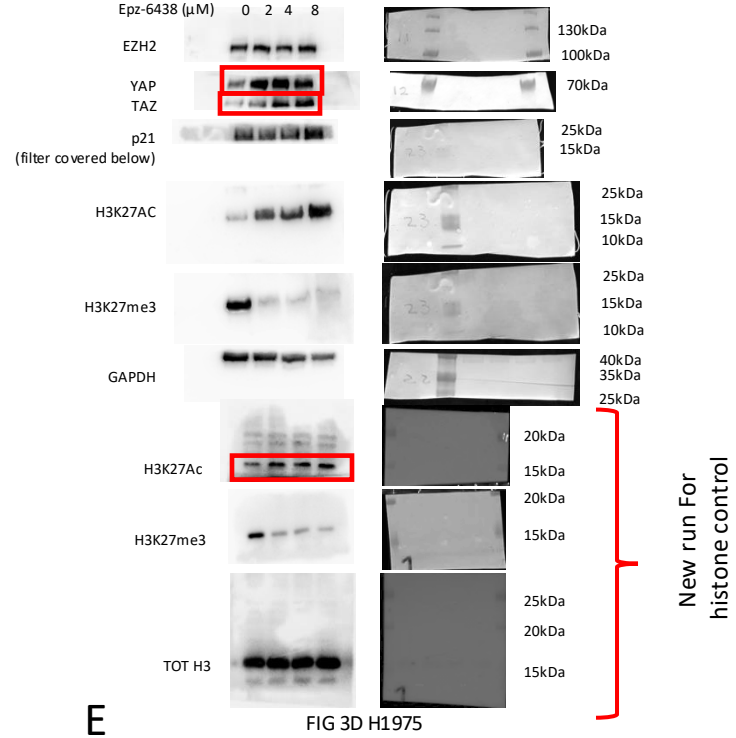

FIG 3D H1975

**D**

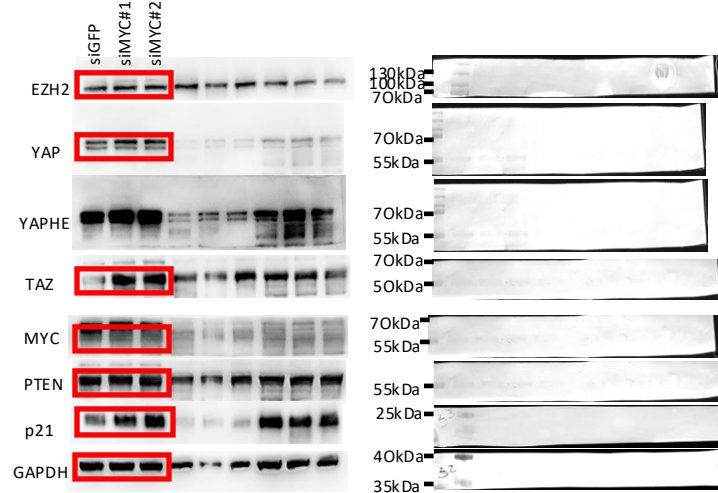

H1299

**E**

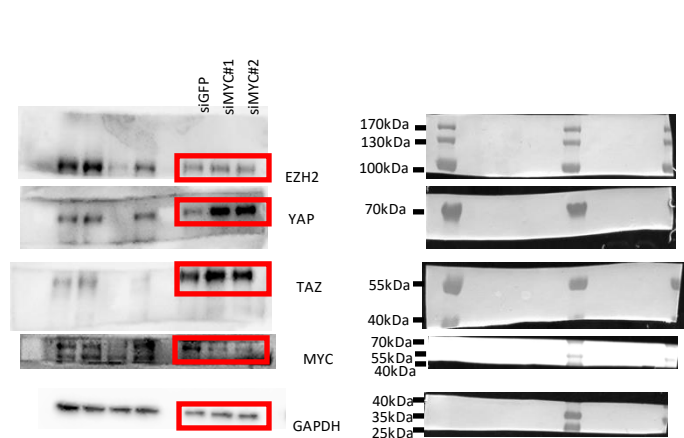

H1975

**Fig. S12**

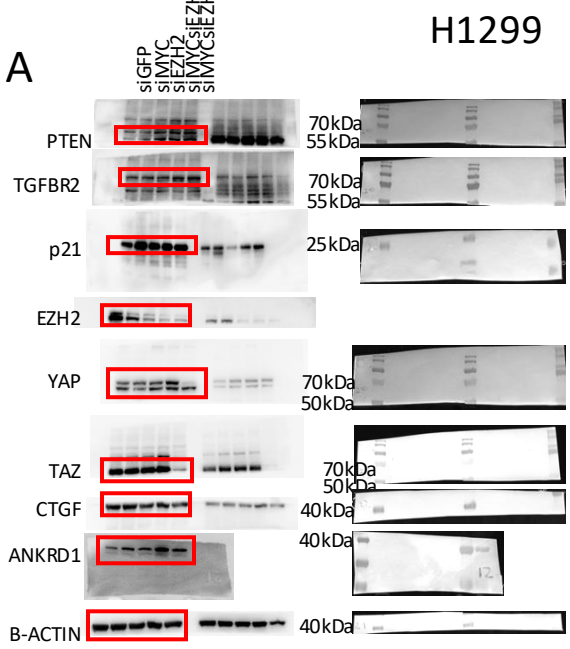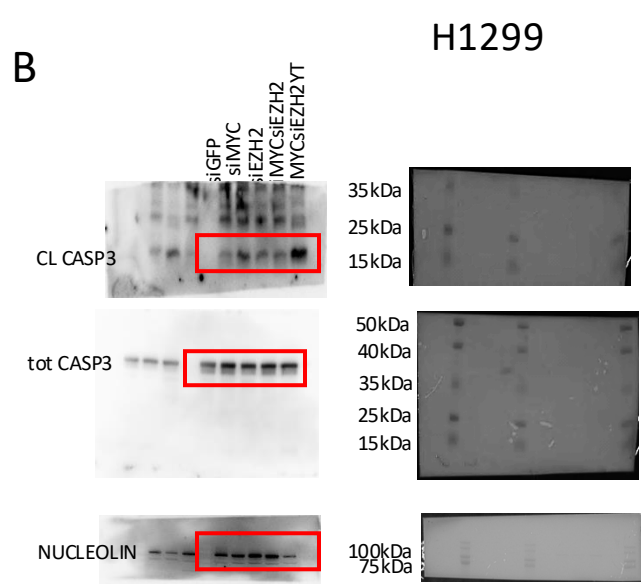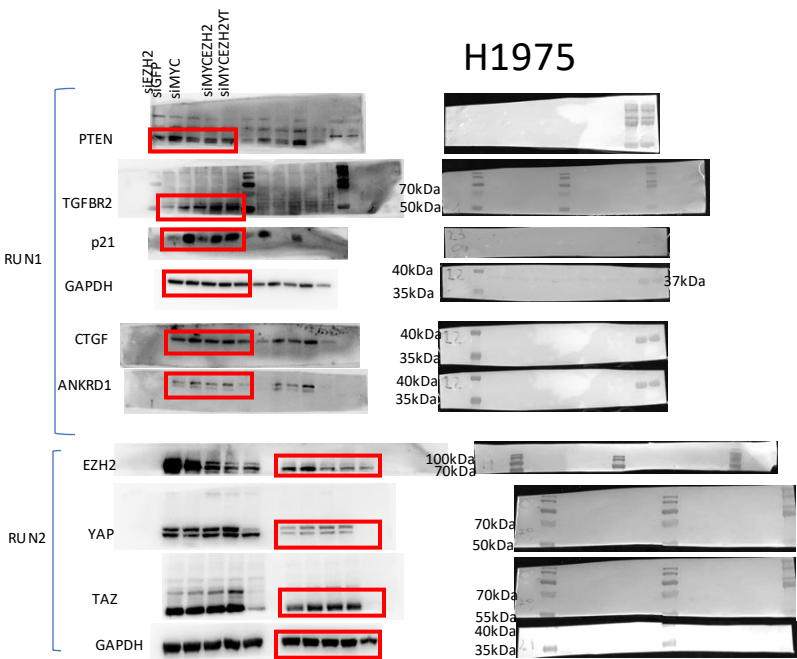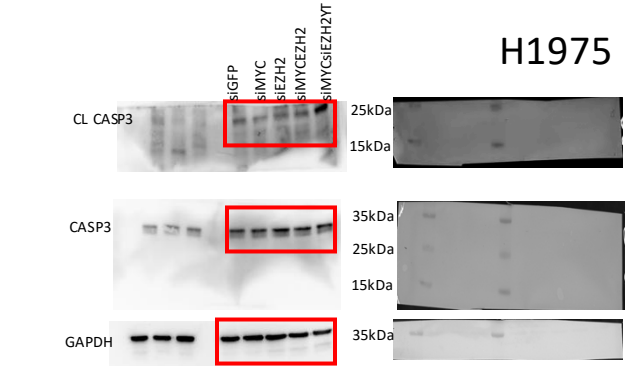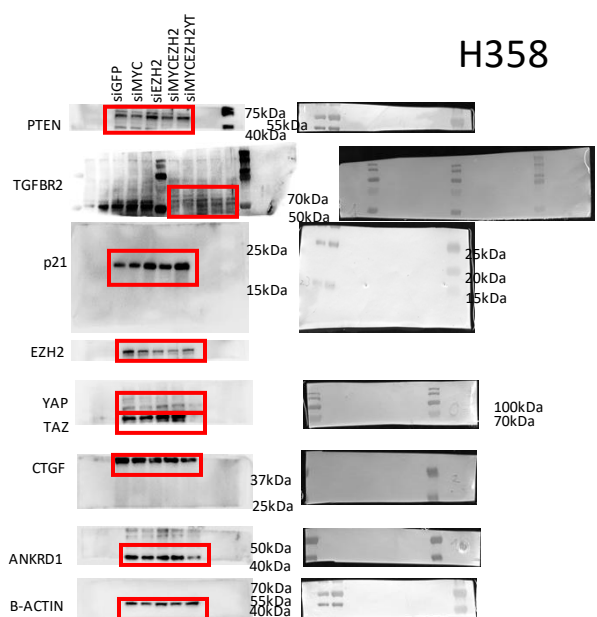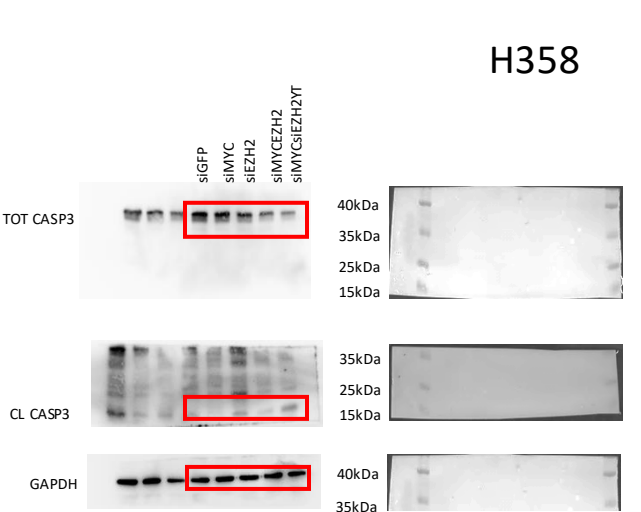

**Fig. S13**

**A**

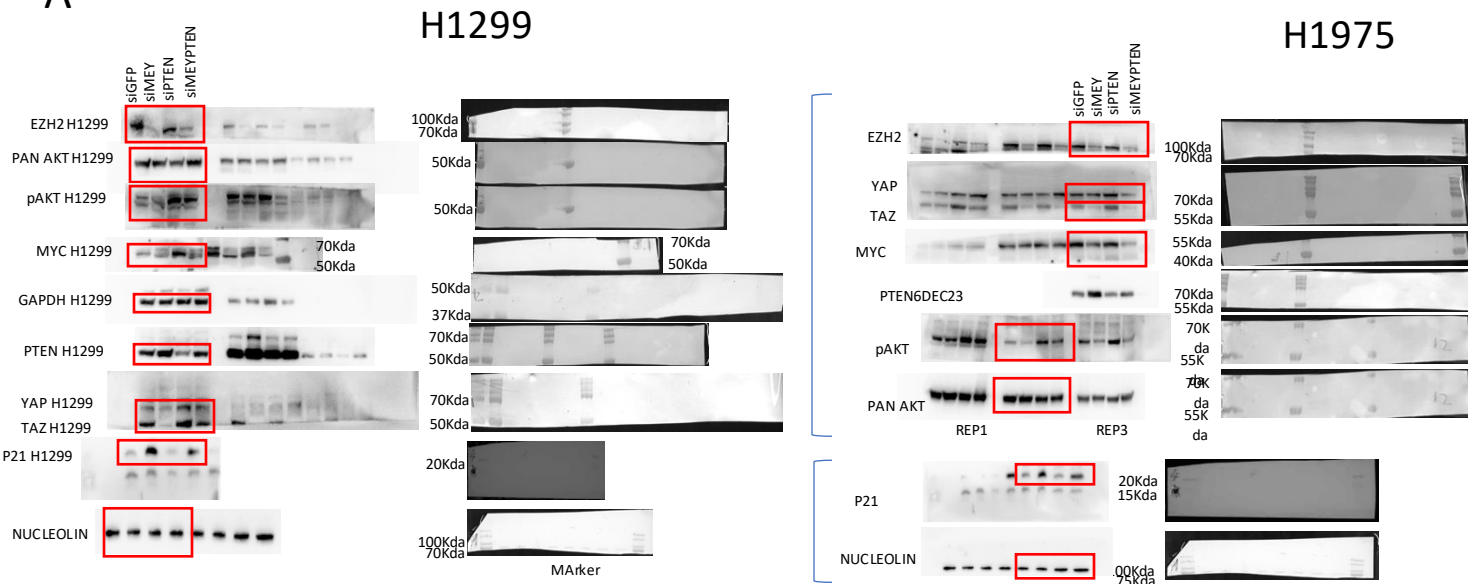

**B**

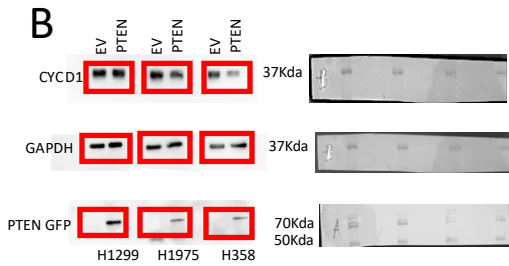

**C**

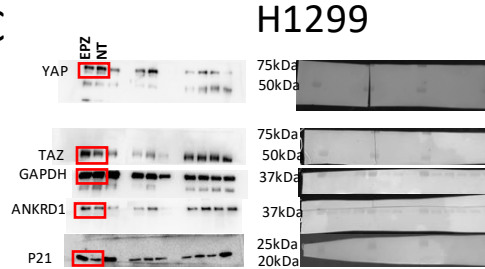

**D**

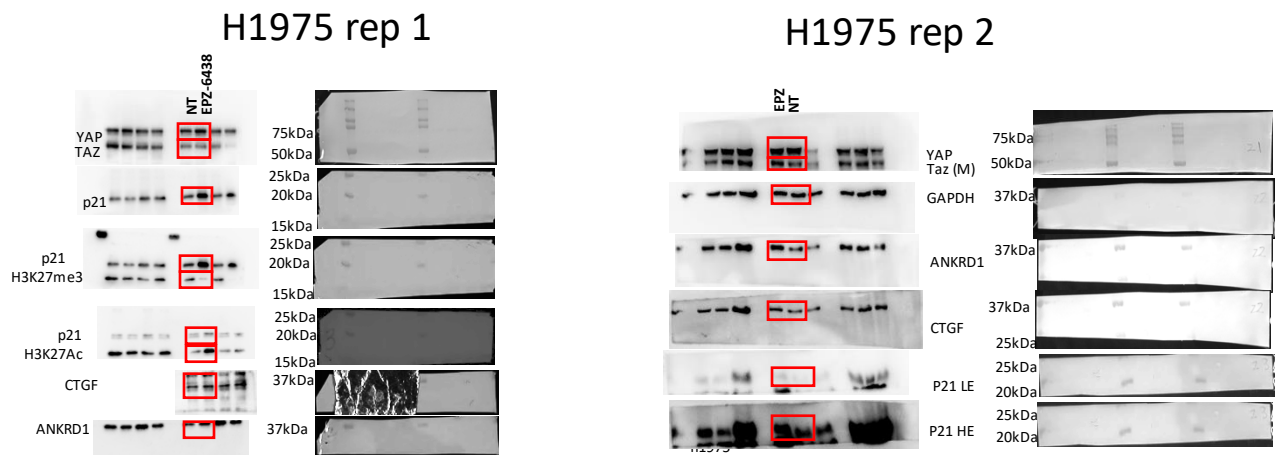

**E**

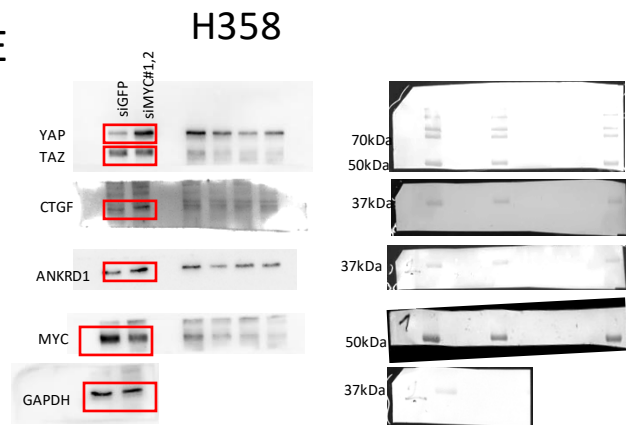

**Fig. S14**

**A**

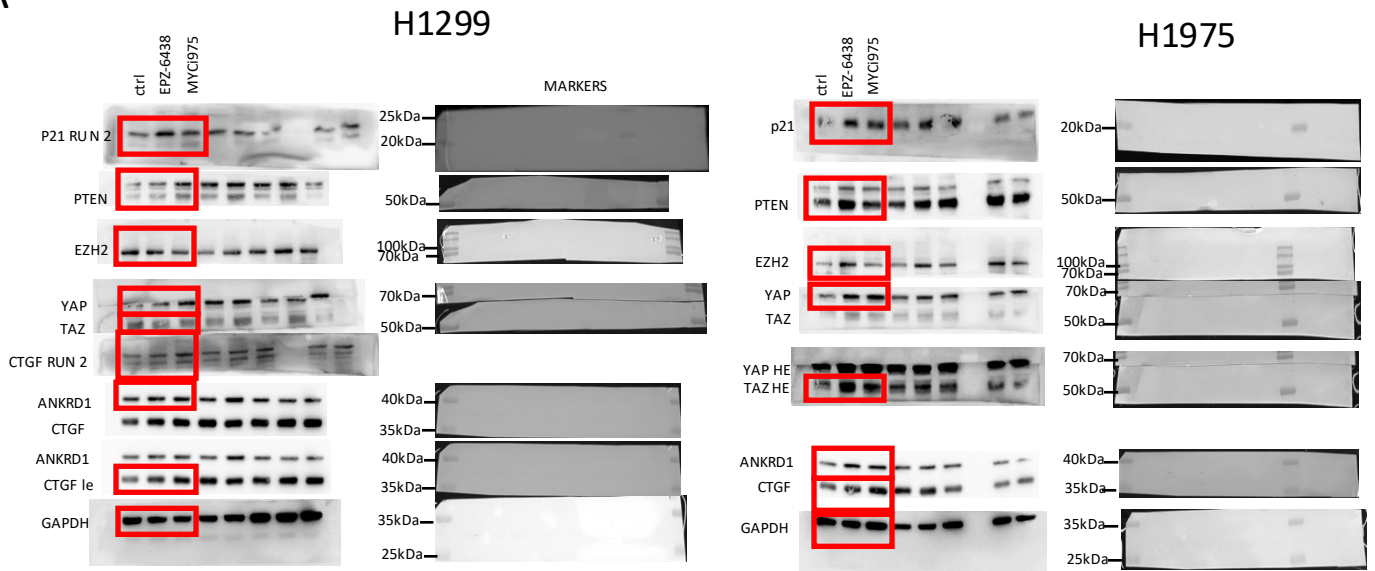

**B**

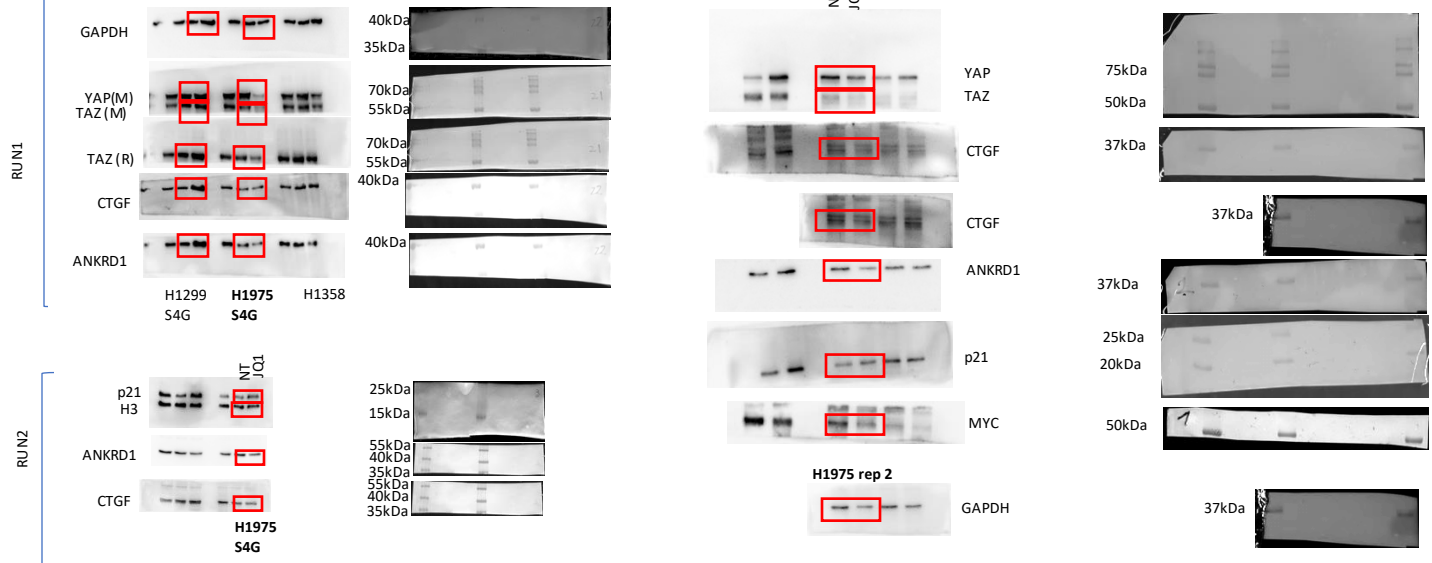

Fig. S15

H1299

H1975

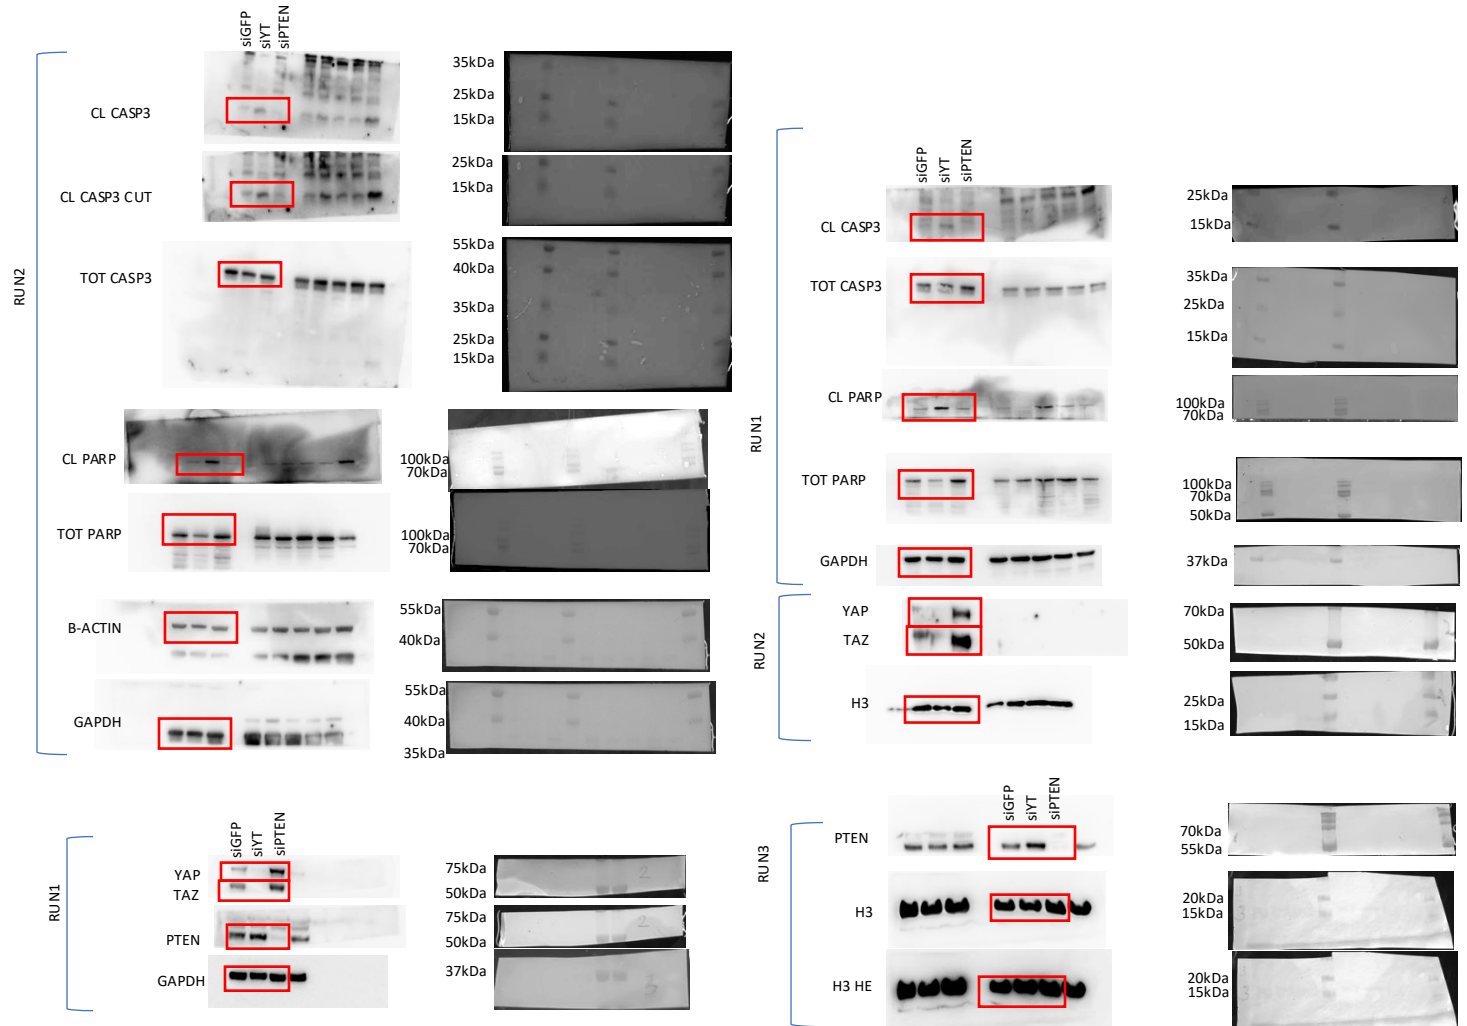

Fig. S16

### H1299

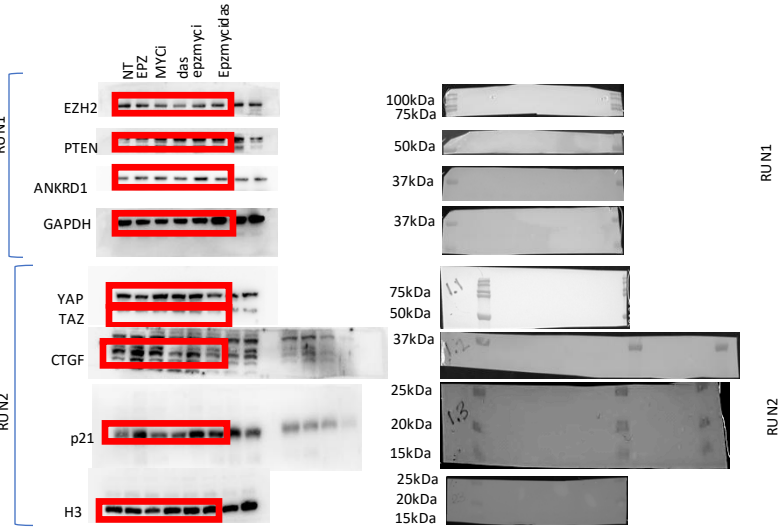

### H1975

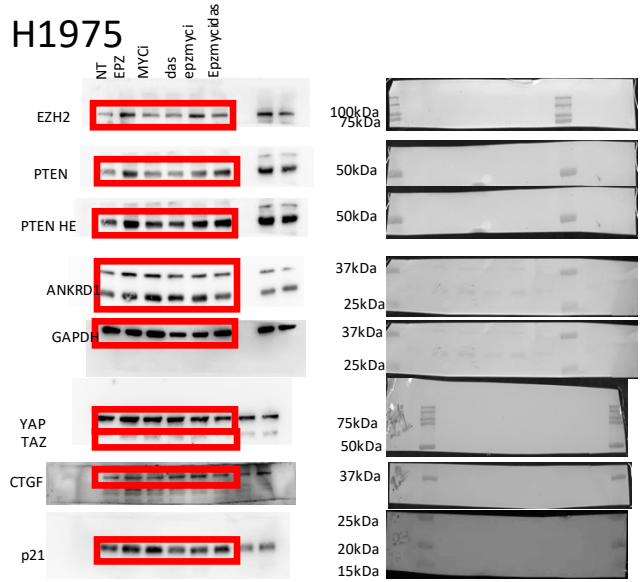

### H358

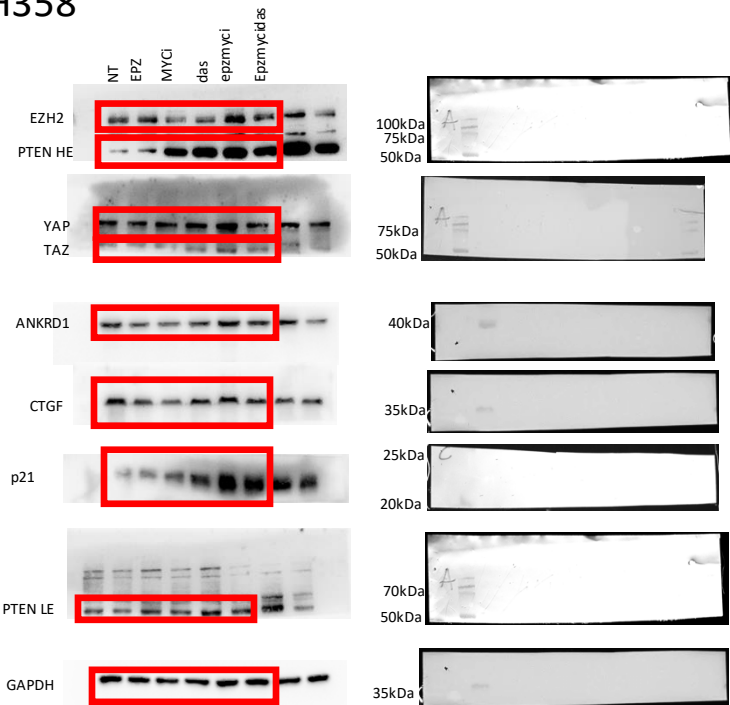

Supplement: MOESM1 [file 41420_2024_2216_MOESM1_ESM-1.pdf]
