# Supplementary material for: The oncogenic axis YAP/MYC/EZH2 impairs PTEN tumor suppression activity enhancing lung tumorigenicity
Source: Cell Death Discov. 2024 Oct 25;10:452. doi: 10.1038/s41420-024-02216-8 (PMC11511861; doi:10.1038/s41420-024-02216-8)
Supplement: Supplementary file 2 — TABLE S1 [file 41420_2024_2216_MOESM2_ESM.xlsx]

## Sheet: siYAP myc bound
MYC targets from chipseq atlas (at least 2 chip-seqs over 4) in A459
deregulated in RNASEq GSE151200 upon siYAP. In column H and I the presence of either EZH2 or H3k27me3 is highlighted
pval<0.05 & padj<0.3
gene	log2fold	Pvalue	padj	Direction siYAP\siCNTRL	R Pearson	pval	EZH2 targets(a549)	H3K27me3 targets(a549)
SELENBP1	0.351734468265601	0.00172582677951042	0.0930893569266429	up	-0.261261	1.9519e-05	\	\
TMEM59L	0.480406805966928	0.000492558654558303	0.0386909162003832	up	-0.259517	2.5183e-05	\	H3K27me3 targets
NEK8	0.213891673036386	0.0213575474226077	0.399822202620105	up	-0.251292	8.1684e-05	\	\
MCF2L	0.399359273975056	0.000462676015473085	0.0380372863051049	up	-0.249229	0.00010902	EZH2 target	H3K27me3 targets
APOD	0.490029828614983	0.0289929118432122	0.471279666132469	up	-0.245867	0.00017355	\	\
RAP1GAP	0.237966203149057	0.000000377757634755924	0.000150621598093367	up	-0.241718	0.00030523	\	\
ABCC6	0.477452997989718	0.0281268186081823	0.465385562569071	up	-0.240474	0.00036075	\	\
AGR2	0.381306265250783	0.000000000000000390999894644621	0.00000000000198774571439959	up	-0.20562	0.027119	\	\
ABAT	0.426942270391888	0.0143598615816915	0.325901546053233	up	-0.200789	0.046734	\	H3K27me3 targets
SH3BGRL2	0.360517320600398	0.00180847956278688	0.0958234940783396	up	-0.200642	0.047505	\	H3K27me3 targets
DYNC2LI1	0.21421056630437	0.0203577905577529	0.388709550227141	up	-0.188715	0.17205	\	\
IL11RA	0.278126966773532	0.036106996014178	0.523332689913264	up	-0.187111	0.20335	\	\
LFNG	0.305211796271439	0.00233532464460283	0.111205328392519	up	-0.186441	0.21796	\	\
TNS1	0.251695440416674	0.0272733314423295	0.45683953449734	up	-0.173951	0.76008	\	\
FAM149A	0.258181162835004	0.0280836578304457	0.46508917900619	up	-0.173892	0.76441	\	H3K27me3 targets
FMO5	0.335914248117783	0.0332806043601919	0.504264507895187	up	-0.165017	0.00017646	\	\
CLIP3	0.358152246083901	0.0136150950226616	0.31896654065187	up	-0.164013	0.00019347	\	\
GAL3ST1	0.259395659628968	0.000473971202475594	0.038399220726459	up	-0.15394	0.00047298	\	\
RAB26	0.281211251941509	0.00000989407000920722	0.00189807465695499	up	-0.152461	0.00053695	\	\
CDR2	-0.201334089483999	0.0101393892467751	0.273687279850679	down	-0.150708	0.0006231	\	\
CDKN1C	0.932861796724623	0.00210651960429858	0.105768089267683	up	-0.146865	0.00085871	\	H3K27me3 targets
NFIA	0.308864356426197	0.0101792724387813	0.273687279850679	up	-0.143593	0.0011216	\	\
LDHD	0.329884096716667	0.0218277194828532	0.403515159712563	up	-0.14307	0.0011699	\	\
PPP1R3E	0.203964872383209	0.0297759925521075	0.478273940400558	up	-0.138525	0.0016782	\	\
CCDC57	0.223312688651562	0.00970201390261232	0.265890097991404	up	-0.135276	0.0021581	\	\
GJB1	1.13440872057065	0.000143151573613387	0.0160828024830289	up	-0.133596	0.0024525	\	\
SEMA3E	0.283536605584407	0.00533877483601725	0.188479142865297	up	-0.132245	0.0027156	EZH2 target	H3K27me3 targets
ADRA2A	0.90377490225889	0.0197703977055502	0.383125968082108	up	-0.130776	0.0030304	\	H3K27me3 targets
TF	0.627065169679437	0.0385297234586309	0.541466431604187	up	-0.129052	0.0034421	\	\
AQP7	0.375950806374381	0.0452076014088436	0.585166502004351	up	-0.128099	0.0036908	\	\
FRY	0.441352335901017	0.012625492674133	0.30383360180887	up	-0.127466	0.003865	\	\
MLXIPL	0.316491962906305	0.0354947049505391	0.520805062575859	up	-0.120884	0.006169	\	\
NEB	0.909048589523031	0.000000000145025294341277	0.000000196605957361991	up	-0.1197	0.0066953	\	\
SCIN	-0.506035015021735	0.000350888728999104	0.0317446457471872	down	-0.113462	0.010188	\	H3K27me3 targets
FUS	-0.222519972884653	0.00000151735804585677	0.000447180809601411	down	-0.112769	0.010662	\	\
MYCBPAP	0.546902844983289	0.0220194239522263	0.404485082266054	up	-0.112165	0.011091	\	\
GSTA4	0.312828824257705	0.0033188654601358	0.142985443075978	up	-0.109735	0.012975	\	\
HSD17B8	-0.34353206057613	0.0274359255599089	0.457754548189852	down	-0.105471	0.016969	\	\
MAD1L1	-0.251368195691049	0.0174867363445369	0.358460467304594	down	-0.103521	0.01913	\	\
CDH1	0.203020694404173	0.00129713398523395	0.0782706812751703	up	-0.100177	0.023396	\	\
ABCB6	0.407550667862983	0.00845392499753454	0.246984265316871	up	0.101935	0.021061	\	\
PHAX	-0.238928103838687	0.00150939281121769	0.0857360413857872	down	0.102218	0.020704	\	\
HTRA2	-0.215676949433158	0.0350834354185427	0.519400862594325	down	0.102888	0.019881	\	\
TGM2	-0.341867808750082	0.00000000104055183182731	0.00000105798107501042	down	0.107217	0.015219	\	\
HMOX1	-0.2144158302764	0.000000926971621442989	0.000314166132034053	down	0.107404	0.015042	\	\
COMMD8	-0.63300441567684	0.000000480958770049043	0.000184533897904666	down	0.108036	0.014454	\	\
TROAP	-0.232434290390658	0.0435742963318549	0.575034562292481	down	0.111791	0.011364	\	\
CCNE1	-0.226656116147578	0.0105961134348342	0.279170961367986	down	0.11192	0.011269	\	H3K27me3 targets
CYP51A1	-0.227431505872349	0.0139078576220245	0.322849640118572	down	0.112341	0.010964	\	\
POLD1	-0.211981747713335	0.017571943276168	0.358947117306889	down	0.113762	0.0099888	\	\
GINS1	-0.232676371599926	0.0424357982817993	0.567699256421757	down	0.11463	0.0094313	\	\
GABRA5	-0.210831937958342	0.0278469395658071	0.461882150139223	down	0.115599	0.0088422	\	\
TNS4	-0.33709506026278	0.0149833119690616	0.332989780208599	down	0.115986	0.0086164	\	\
FAM111B	-0.497049868461566	0.00219638092202023	0.108202257156211	down	0.11629	0.0084421	\	\
DCUN1D1	-0.26637226055415	0.00231981427032998	0.110735735181127	down	0.119633	0.0067261	\	\
ZWINT	-0.299158072436243	0.00061701780119687	0.0464705814345865	down	0.120395	0.0063815	\	\
TRIM29	-0.575069737291995	0.0161124262250874	0.344321296686483	down	0.120438	0.0063628	\	\
NAV3	-0.344658034729049	0.00000136132283205069	0.000419431814996223	down	0.12244	0.0055341	\	\
SASS6	-0.366210764346725	0.0314199740877126	0.4895978337729	down	0.122644	0.0054555	\	\
GREM1	-0.472097660477604	0.000000000429107121952827	0.00000048477185138393	down	0.123196	0.0052475	EZH2 target	H3K27me3 targets
PM20D2	-0.242021141186457	0.00114061751198544	0.0713675603268428	down	0.126295	0.0042068	\	\
ROBO1	0.247065917688083	0.00202108452755836	0.102490658024686	up	0.126855	0.0040401	\	H3K27me3 targets
YWHAQ	-0.212131537076343	0.0000000019304981763024	0.00000157026721660437	down	0.133371	0.0024947	\	\
CHAF1A	-0.312954917578398	0.0107398271804584	0.281037197026005	down	0.135248	0.0021626	\	\
CENPM	-0.408548818352645	0.00726106890956209	0.226989122300965	down	0.138257	0.0017138	\	\
TGFB2	-0.31870817623645	0.0000464383725401403	0.00665855002594139	down	0.138312	0.0017064	\	\
PKP2	-0.274535319504726	0.0311572108914702	0.488121635961516	down	0.144415	0.0010494	EZH2 target	H3K27me3 targets
NEDD4	-0.218781121078258	0.00000545638599190959	0.00116795378047875	down	0.145027	0.00099839	\	\
FRMD6	-0.312164701604164	0.00204481506836109	0.103179440236037	down	0.146092	0.00091511	\	\
FANCI	-0.389415805519004	0.00000000328982102231803	0.00000247062338730749	down	0.146398	0.00089235	\	\
G2E3	-0.212707975759335	0.036896712142884	0.526522555386348	down	0.146613	0.00087671	\	\
UBE2S	-0.34984916400964	0.0010425531795864	0.0673659159203733	down	0.146777	0.00086499	\	\
CENPF	-0.279565797195584	0.00000460000084528608	0.00103709675432288	down	0.148373	0.00075786	\	\
TUBA1B	-0.227478674777361	0.000444287171230653	0.0374049234573964	down	0.149028	0.00071757	\	\
SHQ1	-0.21924953508298	0.0307280379460429	0.485027384421923	down	0.150162	0.00065243	\	H3K27me3 targets
PRIM1	-0.366607518775283	0.0378909131825457	0.536941964855098	down	0.154586	0.00044732	\	\
CDCA3	-0.301900010048306	0.00531991445488258	0.188479142865297	down	0.155612	0.00040926	\	\
CDCA8	-0.207751339671362	0.0487130979849395	0.606230628839501	down	0.15567	0.00040721	\	\
FKBP5	0.228891213990568	0.0189682750317055	0.375944617002259	up	0.159004	0.00030377	\	\
EIF4EBP1	-0.340244669028771	0.00000372860825382276	0.000913509022186576	down	0.159765	0.00028389	\	\
WDHD1	-0.285231171402485	0.00776277316565275	0.235368707347193	down	0.162045	0.00023136	\	\
SUV39H2	-0.306738483437453	0.0434923544563655	0.575034562292481	down	0.162637	0.00021928	\	\
CLDN12	-0.367790534466914	0.000000000166254366317104	0.000000211298908691145	down	0.164842	0.00017932	\	\
UHRF1	-0.460124628398079	0.0101158499208252	0.273544957632951	down	0.165411	0.00017018	\	\
KIF18B	-0.321766673401631	0.00608975813723025	0.208476821078413	down	0.166337	0.00015623	\	\
BUB1	-0.287610963764626	0.000142131239481212	0.0160568819713914	down	0.168975	0.00012214	\	\
NUF2	-0.348166982021349	0.0020077456867298	0.102068771349126	down	0.169423	0.0001171	\	\
SERPINE1	-0.302999154593919	0.000303362167994033	0.0281683547313181	down	0.173697	0.77894	\	\
SEH1L	-0.207439938509359	0.0177072316678277	0.360076555965276	down	0.176454	0.59579	\	\
PRR7	0.223440950023481	0.0407202076139431	0.556482138326299	up	0.176777	0.57717	\	\
AKR1B1	-0.24282312123315	0.00000000128479258390017	0.00000115210198475143	down	0.179049	0.46115	\	\
CDCA2	-0.238380142618748	0.0322911933533586	0.497954870193762	down	0.179273	0.45099	\	\
PLOD2	-0.640781362074472	0.00000000000000000000000000000000000000000378590342602225	0.0000000000000000000000000000000000000384931730840812	down	0.17963	0.43527	\	\
TTK	-0.379788124095474	0.000659671436331174	0.0484275041797633	down	0.180947	0.38151	\	\
GPR176	-0.374510383616826	0.0232017635032931	0.416630211674946	down	0.180948	0.38149	\	H3K27me3 targets
AURKA	-0.294004005217587	0.00000587565642967411	0.00120688357068104	down	0.181016	0.37889	\	\
TK1	-0.313417186306751	0.0000195455244127881	0.00337895262511747	down	0.182243	0.33479	\	\
PRC1	-0.317351417889946	0.0000000128410304134474	0.000008423301724434	down	0.182529	0.32526	\	\
DTL	-0.435283981452123	0.000264230573525079	0.0258323495799639	down	0.182837	0.31526	\	\
LDHA	-0.260784896016704	0.0000000000467804004716807	0.0000000864799494174206	down	0.183426	0.29696	\	\
FABP5	-0.219964936461075	0.0304132570482021	0.482860257551984	down	0.185274	0.24581	\	\
CKS1B	-0.347276807948783	0.000104868068120468	0.0124707144165481	down	0.185632	0.23694	\	\
KIF23	-0.31649985962292	0.0000199173138726367	0.00340351745882409	down	0.186772	0.21062	\	\
TUBA1C	-0.293611272768212	0.0000095644707233329	0.00185231916341881	down	0.187169	0.20213	\	\
RRM2	-0.432565600631499	0.0000000146329830905091	0.00000929880347329697	down	0.188123	0.18302	\	\
NUP54	-0.21152239472789	0.0324696992111497	0.499071302689893	down	0.191293	0.13114	\	\
BIRC3	-0.256974765766772	0.0104247994069934	0.277235990981012	down	0.192933	0.11012	\	\
HSP90AA1	-0.207012401915636	0.00000513562298081979	0.00111098822675501	down	0.194556	0.092514	\	\
GEMIN4	-0.207464229984679	0.00765840469596757	0.233834323562313	down	0.196709	0.073249	\	\
BIRC5	-0.307193126648816	0.000108454416996481	0.0128222126140898	down	0.199936	0.051374	\	\
RACGAP1	-0.313209294546335	0.00000475504951517455	0.00105102099881603	down	0.202034	0.040671	\	\
HJURP	-0.325473172080757	0.0000000366555350735574	0.0000209211608397986	down	0.202219	0.039836	\	\
EXO1	-0.371609408970317	0.0152994675363482	0.335614533281165	down	0.207049	0.002303	\	\
EIF4H	-0.244041022701031	0.000000219162326239285	0.0000990370200905747	down	0.211849	0.001319	\	\
GPN1	-0.231333978776741	0.00498107926513137	0.182504949290895	down	0.213289	0.011129	\	\
DLGAP5	-0.205134647222948	0.0101981062211023	0.273687279850679	down	0.216227	0.0078427	\	\
ANLN	-0.288032350049257	0.00000164690813679577	0.000471688407911858	down	0.217146	0.0070223	\	\
CKS2	-0.220693682510609	0.00166901556304261	0.0913327667910129	down	0.217757	0.0065228	\	\
CENPE	-0.232178385367205	0.0110163472669089	0.284647295644972	down	0.220898	0.0044498	\	\
DBF4	-0.284738547895903	0.0115654747342737	0.290892969578999	down	0.222102	0.0038374	\	\
SHCBP1	-0.375046544148986	0.00010021791647961	0.0121945336924876	down	0.223947	0.0030533	\	\
FANCD2	-0.299089372478578	0.00743472639089899	0.229764682612357	down	0.22979	0.0014614	\	\
STAMBPL1	-0.245594396926117	0.00380174460867544	0.157772401260031	down	0.230871	0.0012724	\	\
PLK1	-0.265145323565304	0.00014814891229033	0.0165527919309003	down	0.231662	0.0011492	\	\
E2F5	-0.368906734777781	0.00516382692453884	0.185852071699995	down	0.232212	0.0010705	\	\
KIF11	-0.263727743645028	0.000632526874842895	0.0469431897807674	down	0.232502	0.0010312	\	\
TFAM	-0.227535986221979	0.00186996652662314	0.0977526203570222	down	0.235115	7.339e-05	\	H3K27me3 targets
NDRG1	-0.241048794989977	0.00000569892992929698	0.00118558159983711	down	0.235829	0.00066823	\	\
CCNB1	-0.314897112203343	0.0000000840272669976783	0.0000427173618599447	down	0.239642	0.00040329	\	\
PRPF4	-0.260277638908404	0.000503668365646026	0.0393926777515844	down	0.25014	9.6001e-05	\	\
MCM4	-0.277412138131851	0.00000409623333590756	0.000979963586890356	down	0.251632	7.7869e-05	\	\
CCNA2	-0.289534545355686	0.00166774462578971	0.0913327667910129	down	0.255588	4.4407e-05	\	\
NUP205	-0.202040094008957	0.00131360409958275	0.0788147161788868	down	0.259377	2.57e-09	\	\
UMPS	-0.207189989209734	0.00497363567274716	0.182504949290895	down	0.260167	2.2906e-05	\	\
GPATCH4	-0.225839243697794	0.00400488298363191	0.161366937381508	down	0.262162	1.7098e-05	\	\
ATAD2	-0.386218897234727	0.000000646104409911038	0.000234616663848946	down	0.263705	1.3616e-05	\	\
PRR11	-0.298105973551688	0.00113496206915208	0.0713675603268428	down	0.265017	1.1203e-05	\	\
TRIP13	-0.29706347694709	0.00227331182823274	0.108771284769677	down	0.266656	8.769e-07	\	\
RAD18	-0.289779557554158	0.0113383427973687	0.288206500980615	down	0.27549	2.2753e-06	\	\
ARHGAP11A	-0.315558321968833	0.0000327880175380306	0.00520894012996759	down	0.279593	1.1958e-06	\	\
MCM7	-0.274614082365384	0.00000151366763108593	0.000447180809601411	down	0.289627	2.3695e-07	\	\
NAA15	-0.200390879898371	0.0014572823043403	0.0839682849618083	down	0.301984	2.9513e-08	\	\
TEAD4	-0.311943003412364	0.00532053406468633	0.188479142865297	down	0.320872	1.0038e-09	\	\
LYAR	-0.251426883362532	0.0267139156426562	0.452689562161179	down	0.373369	2.2107e-14	\	\
EPHA2	-0.266725448452256	0.00000117246730739591	0.000378446391998345	down			\	\
E2F2	-0.75116765090632	0.0115727766112323	0.290892969578999	down			\	\
SMAP2	-0.320487635173841	0.00778569702997153	0.235598436167368	down			\	H3K27me3 targets
EIF2B3	-0.301457798402593	0.0175675591285663	0.358947117306889	down			\	\
NASP	-0.210284119431284	0.000830497075631241	0.0578361576471277	down			\	\
ORC1	-0.341088827077168	0.0198461365020842	0.383258486011284	down			\	\
LRRC8C	-0.245536702412445	0.0496419461882917	0.611670225946542	down			\	\
AKNAD1	1.52907070740656	0.023893267045349	0.421614040981431	up			\	\
EPS8L3	0.276740115756774	0.0251418121546097	0.434005730190142	up			\	\
HIPK1	-0.242097974979882	0.000819714606849587	0.0576778426653507	down			\	\
ECM1	0.285064924474543	0.0272180618685292	0.456289602717677	up			\	\
ANXA9	0.311470646238546	0.0217543783602733	0.403515159712563	up			\	\
PIGM	-0.213082419542964	0.00984896757900802	0.268110784095218	down			\	H3K27me3 targets
PEA15	-0.286879680123338	0.0000000361904357420658	0.0000209211608397986	down			\	\
MPZ	0.435525483160966	0.036486674685765	0.524350904406382	up			\	H3K27me3 targets
MR1	0.256355230568795	0.00689963706132597	0.222352012111036	up			\	\
GOLT1A	0.302387878473883	0.0285657655384811	0.466218365452426	up			\	\
TAF5L	-0.309174463854212	0.000380519586368069	0.0340875144880823	down			\	\
TRIB2	0.912666004494674	0.0161076011393719	0.344321296686483	up			EZH2 target	H3K27me3 targets
ADGRF3	0.622398121050571	0.0133506223664919	0.315680123049549	up			\	\
TRIM54	-0.825102896155346	0.0147434316144255	0.330102130916165	down			\	\
EPAS1	-0.214177085355264	0.0000112015471878119	0.00210910613022366	down			\	\
EFEMP1	-0.520450642394158	0.0077665307415769	0.235368707347193	down			\	H3K27me3 targets
DQX1	0.818457028684907	0.0384390846459681	0.541466431604187	up			\	\
RPIA	-0.30355816601591	0.0361903078412878	0.523699541369137	down			\	\
FAM168B	-0.285033126355195	0.000000456476084730073	0.000178508484288193	down			\	\
GPR39	-0.255130091594104	0.0470309653371131	0.598857032016403	down			\	\
CXCR4	-0.499844066596147	0.0374267796865401	0.53147595316047	down			EZH2 target	H3K27me3 targets
C2orf72	0.25505599598813	0.00546189603240362	0.191495958308496	up			\	H3K27me3 targets
PTMA	-0.223150653644964	0.000000134768995908742	0.0000652506555191495	down			\	\
HDAC4	-0.217703069916787	0.0177486387219679	0.360558010400816	down			\	\
LSM3	-0.335161581026203	0.0000298618253200443	0.00481936680859604	down			\	\
RARB	0.205903905027678	0.0134559815985853	0.316491881717807	up			\	H3K27me3 targets
TRANK1	0.312462342006801	0.000476722750927273	0.0384688775401036	up			\	H3K27me3 targets
DNAH1	0.236465772492548	0.0465651331157544	0.595581107409654	up			\	\
CMSS1	-0.244983219500995	0.00942368982746991	0.261790618362842	down			\	\
AMOTL2	-0.523269098172578	0.00000000178218238822598	0.00000151002828602397	down			\	\
P3H2	0.201492297181337	0.0297342300809189	0.478273940400558	up			\	\
ADH1C	0.707740760812648	0.0266609825582368	0.452169374747077	up			\	\
EGF	0.612418858014283	0.0332405597033123	0.504264507895187	up			\	\
FGB	0.498493327629335	0.00152442066162826	0.0860618353386618	up			\	\
TMEM144	0.202200011665667	0.000446961262469179	0.0374049234573964	up			\	\
ZSWIM6	0.218058194925403	0.0245764056992562	0.429186613738155	up			\	\
MAST4	0.225785478665306	0.00221764591889523	0.108202257156211	up			EZH2 target	H3K27me3 targets
ANKDD1B	1.17626689804784	0.033112413311049	0.504264507895187	up			EZH2 target	\
WWC1	-0.253859900142493	0.000110680740985693	0.0129523736512716	down			\	\
FGFR4	0.223138497992162	0.000981684982175827	0.0650246388030797	up			\	\
SYNGAP1	0.240816438623389	0.0333757756746671	0.504264507895187	up			\	\
STK38	-0.299885425094825	0.000000245532630196901	0.000108541435544652	down			\	\
OGFRL1	-0.267330395976004	0.016893131798333	0.351608838402356	down			\	\
COL12A1	-0.418967577335269	0.00213836662379199	0.106577660036299	down			\	H3K27me3 targets
GOPC	-0.297501419928259	0.0000596504968496395	0.00819589765836094	down			\	\
PKIB	0.235014415310662	0.0492766980884933	0.609885365568783	up			EZH2 target	H3K27me3 targets
EPB41L2	-0.206893614848644	0.00225456580694791	0.108503658964805	down			\	\
WDR27	0.248835527097575	0.017148814253231	0.354391400243347	up			\	\
FIGNL1	-0.331420082081685	0.00563458017752546	0.19687145689	down			\	\
ZNF789	0.377563584762424	0.0032257966452129	0.139864764990201	up			\	\
AGFG2	-0.296908471855891	0.0000386163161059948	0.00586017005981644	down			\	\
ZNF467	0.302392251486301	0.0386457669656072	0.542347599203328	up			\	\
FGL1	0.398188777824213	0.00000397198024698144	0.000961550218123423	up			EZH2 target	\
CDH17	0.257827893926534	0.000000129333932834168	0.0000641464761995804	up			\	\
ANXA13	0.2089697661665	0.000111466210424024	0.0129523736512716	up			EZH2 target	\
PTP4A3	0.362116247282955	0.000309237577588843	0.0285833915466778	up			\	H3K27me3 targets
ADGRB1	0.494596382634295	0.00741535616890092	0.229514867115069	up			EZH2 target	H3K27me3 targets
CBWD1	-0.401433313442796	0.0233223462661629	0.416698457386765	down			\	\
C5	0.212995515494098	0.000936719770006021	0.0633120517792877	up			\	\
MVB12B	-0.213000186097402	0.0397462275992902	0.551323741481065	down			\	\
NTNG2	0.398950501173426	0.03494478584541	0.518309423899644	up			EZH2 target	H3K27me3 targets
TTF1	-0.222505320899084	0.0428944594112294	0.570476672418148	down			\	\
TUBB4B	-0.248684452894401	0.00000232156670665511	0.000629454119731088	down			\	\
HACD1	-0.232233909685945	0.00340015622938265	0.145562477735782	down			\	\
A1CF	0.416474712768959	0.00220818308279504	0.108202257156211	up			\	H3K27me3 targets
PCDH15	1.65009938433888	0.02915606912978	0.47242124761281	up			\	H3K27me3 targets
HECTD2	0.345491225202386	0.00243748456928758	0.113684056689135	up			\	\
AVPI1	-0.230517095319465	0.00166103271453845	0.0913327667910129	down			\	\
PDCD4	-0.33047395550337	0.00000369830081995652	0.000913509022186576	down			\	\
CALY	1.2876142470582	0.0150264194883379	0.333196823179443	up			\	H3K27me3 targets
CEND1	0.612170280788282	0.0154671530174468	0.33711099315089	up			\	\
PIDD1	0.230793232035734	0.0197365950892598	0.382961508721468	up			\	\
PGAP2	0.22657091443928	0.00450736470782577	0.170326348395783	up			\	\
LBHD1	0.250685274007653	0.0343512680471202	0.513249842570307	up			\	\
CCND1	-0.215281169247594	0.0000000744584543417027	0.0000388234017702186	down			\	\
CLMP	-0.398756959589582	0.0124393418152129	0.301512336788132	down			\	\
SIAE	0.204401096668407	0.00440376980094831	0.170014869187359	up			\	\
SCNN1A	0.332773005261525	0.0154306140458455	0.336903123511672	up			\	\
C1RL	0.225814860817147	0.0010051046763802	0.0662852836258179	up			\	\
KRT7	-0.257747668788673	0.0153705681870082	0.33681088802027	down			\	H3K27me3 targets
KRT83	-0.403930624237552	0.0462374094366644	0.593959394121649	down			\	\
ATF7	0.223493480111879	0.0155661715878905	0.338543421646795	up			\	\
TMTC2	-0.226323488427202	0.00801829033315944	0.239512186844054	down			\	H3K27me3 targets
SOCS2	-0.273153372833362	0.0473092859729824	0.600895896477575	down			\	H3K27me3 targets
CRYL1	0.296752543576346	0.011867083623867	0.294631310981213	up			\	\
KBTBD6	-0.376355849391005	0.00631262543645069	0.213521606143183	down			\	\
MBNL2	-0.374357210005937	0.00002647586160021	0.00434787594042513	down			\	\
TEX30	-0.438340096857789	0.0357520955818518	0.521206660151948	down			\	\
MAP4K5	-0.282812265801581	0.0000212875361245966	0.00357753757928655	down			\	\
JDP2	-0.286352329201437	0.00167080350362709	0.0913327667910129	down			\	\
GSTZ1	0.205048199104221	0.00836979340854173	0.246625873704088	up			\	\
ADCK1	0.313775143046077	0.0174670228275896	0.358460467304594	up			\	\
BDKRB2	0.304011761555834	0.0002136351912238	0.0215062951165147	up			\	\
GOLGA8O	2.37061022928283	0.0210285356642203	0.39667465002961	up			\	\
MINDY2	-0.330375321956817	0.000240588000735206	0.0238651560729289	down			\	\
TNFRSF12A	-0.313817962940361	0.00838054972852348	0.246625873704088	down			\	\
ARL6IP1	-0.233901460591367	0.000000146753529818928	0.0000694007681132069	down			\	\
NDUFAB1	-0.216989539504797	0.00065298232528498	0.048110128929964	down			\	\
KIF22	-0.225525850243797	0.00431429905966307	0.168237303186382	down			\	\
ADGRG1	0.286452148036884	0.00000241392574756321	0.000645883948377605	up			\	\
CFAP20	-0.204626998406208	0.0146810523421138	0.330102130916165	down			\	\
PDP2	-0.356369450713818	0.000000608628753806947	0.000225026649248441	down			\	\
ABR	-0.224125963240933	0.00000293737338997785	0.000746643598564996	down			\	H3K27me3 targets
PIMREG	-0.353937256479161	0.000389422561230268	0.0344300338374674	down			\	\
FGF11	1.43970413514176	0.0483876197849619	0.605783690745936	up			\	H3K27me3 targets
KRT222	1.55818237170829	0.0209086175544984	0.395881506490432	up			\	\
KRT20	-0.2229840256582	0.0498812249825711	0.611670225946542	down			\	\
IFI35	0.214560962679394	0.00265468789751405	0.121310288530221	up			\	\
MAP3K14	-0.302850524967743	0.000645048653013067	0.0476984158509845	down			\	\
SKA2	-0.232309544719096	0.00202911704152033	0.102642027460985	down			\	\
CACNG4	-0.271240693683288	0.0402488854199844	0.553521982010577	down			EZH2 target	H3K27me3 targets
ABCA8	1.51341313755273	0.0411017300676927	0.559440214810262	up			\	\
TTYH2	0.360989139534446	0.0496978393386918	0.611670225946542	up			\	H3K27me3 targets
RAB37	0.285102032016195	0.000117354552268136	0.0135591182975713	up			\	H3K27me3 targets
CCDC137	-0.20996965715656	0.00313796091298262	0.136639047463601	down			\	\
CENPX	-0.205948695241139	0.0110327761291963	0.284710028663967	down			\	\
CABYR	0.204221931694373	0.0147104853574401	0.330102130916165	up			\	\
FSTL3	-0.322450518185	0.000000969227890982742	0.00032310244529728	down			\	\
B3GNT3	0.248843277105215	0.00221298033209186	0.108202257156211	up			\	\
PRODH2	0.879462687211958	0.000068658854321513	0.00918538028044715	up			\	\
CEACAM1	0.211257941270036	0.00799266668036439	0.239438095296596	up			\	\
CEACAM19	0.326090836927589	0.00300459794546541	0.131962201341337	up			\	\
BBC3	0.200063768227029	0.0208607165850956	0.395342657742702	up			\	H3K27me3 targets
CA11	0.337897940947162	0.011235299347285	0.287745355449674	up			\	\
ATF5	-0.249279305653117	0.00248294714762808	0.115275639833372	down			\	\
BRSK1	0.373933119296812	0.0233810149927858	0.416698457386765	up			\	H3K27me3 targets
SLC4A11	-0.207768862661733	0.0319716195879917	0.495518882869436	down			\	H3K27me3 targets
PCNA	-0.203929644198794	0.0000135858699936396	0.00244485545416514	down			\	\
MCM8	-0.314425065566217	0.0000948935097434974	0.0117263447917793	down			\	\
HAO1	0.867612177934718	0.0133708855089052	0.315792052059917	up			\	\
DSN1	-0.319537271679463	0.00444472580300624	0.170014869187359	down			\	\
MIS18A	-0.443840753899714	0.0205773033950194	0.391797251439812	down			\	\
KDELR3	0.298311498012784	0.00278753481401727	0.12568629809987	up			\	\
SCML2	-0.310960165670724	0.0150606931535958	0.333196823179443	down			\	\
SRPX2	0.202550050470736	0.0142105298131134	0.324686655898496	up			\	\
STK26	-0.217588593439425	0.0102287844940504	0.273687279850679	down			\	\

## Sheet: siTAZ myc bound
MYC targets from chipseq atlas (at least 2 chip-seqs over 4) in A459
deregulated in RNASEq GSE151200 upon siTAZ. In column H and I the presence of either EZH2 or H3k27me3 is highlighted
pval<0.05 & padj<0.3
gene	log2fold	Pvalue	padj	Direction siTAZ\siCNTRL	R Pearson	pval	EZH2 targets(a549)	H3K27me3 targets(a549)
SORL1	0.254907241380738	0.000669407329205993	0.019558043160063	up	-0.273874	2.9228e-06	EZH2 target	H3K27me3 targets
SLC22A23	0.31277824923832	0.000021230304250017	0.00121610770964534	up	-0.272588	3.5632e-06	\	\
CEACAM6	0.296871512878841	0.000361292574383975	0.0120047132354545	up	-0.261412	1.9092e-05	\	\
SELENBP1	0.285436814802238	0.0103367165713633	0.145918273610953	up	-0.261261	1.9519e-05	\	\
TMEM59L	0.542524745454169	0.0000655383881664574	0.00307788250199749	up	-0.259517	2.5183e-05	\	H3K27me3 targets
PIK3R3	0.390583344267063	0.017352478454917	0.204439541935537	up	-0.254375	5.2805e-05	\	H3K27me3 targets
MCF2L	0.50033455020169	0.00000814975022856523	0.000556124734556624	up	-0.249229	0.00010902	EZH2 target	H3K27me3 targets
PLEKHH2	0.438705586475211	0.000000000101059785960644	0.0000000263468044552524	up	-0.244109	0.00022074	\	H3K27me3 targets
RAP1GAP	0.38209764774227	0.000000000000000141346374342935	0.000000000000119761605094316	up	-0.241718	0.00030523	\	\
MAGED2	0.209022713750611	0.000000306901019935114	0.0000352582208656396	up	-0.233819	0.00086911	\	H3K27me3 targets
SOX2	0.465475186302898	0.024620259824035	0.258068548207089	up	-0.229697	0.0014788	EZH2 target	\
CREB3L1	0.627531849015975	0.0473504132625023	0.384379502472249	up	-0.225398	0.0025475	\	H3K27me3 targets
TMEM130	1.07065608394254	0.00000122619263116654	0.000112826367216161	up	-0.209444	0.017467	\	H3K27me3 targets
CST3	0.222774935539687	0.0000100966077784433	0.000658059356328989	up	-0.208565	0.019339	\	\
HPCAL4	1.72775135428343	0.0335070367973932	0.312231558265401	up	-0.208237	0.020087	\	H3K27me3 targets
SDK1	0.612880601276594	0.00135708932940159	0.0336541603821725	up	-0.207097	0.022905	EZH2 target	H3K27me3 targets
AGR2	0.424089640564352	0.0000000000000000000691485137674634	0.0000000000000000937423351640913	up	-0.20562	0.027119	\	\
SRCIN1	0.257106372304363	0.020933255579992	0.231850627570336	up	-0.204941	0.029299	\	H3K27me3 targets
DISP1	0.317784264820141	0.0167490843341525	0.199643980032234	up	-0.203848	0.033164	\	\
SH3BGRL2	0.37439453361599	0.00103594376410774	0.0275371456772953	up	-0.200642	0.047505	\	H3K27me3 targets
ACSS1	0.239587628468247	0.00223688673812007	0.0478811492838648	up	-0.199235	0.055516	\	\
FGFR2	0.471820151338575	0.0301742203026372	0.295707358965845	up	-0.193786	0.01005	EZH2 target	H3K27me3 targets
SMARCD3	0.228917928850745	0.00430054631178116	0.0771858863636981	up	-0.189245	0.16276	\	\
LFNG	0.379803816307315	0.000122059232228552	0.00492475096699922	up	-0.186441	0.21796	\	\
CCDC107	0.309724203945692	0.0321290664744443	0.304042825787299	up	-0.186114	0.22545	\	\
SERINC2	0.279304589646043	0.000000395208240356407	0.000042297681934987	up	-0.181909	0.03463	\	H3K27me3 targets
ZNF219	0.202620437294582	0.0027902726183486	0.05606738507324	up	-0.180294	0.40732	\	\
TNS1	0.226936364144933	0.044756105004378	0.369514979806751	up	-0.173951	0.76008	\	\
FAM149A	0.32983615055747	0.00439480889009824	0.0782753424813004	up	-0.173892	0.76441	\	H3K27me3 targets
PCSK1N	0.449045164088441	0.0000000000000434284784656934	0.0000000000245310585999965	up	-0.171101	0.99897	\	\
CCDC126	0.353269754468758	0.0158027912994027	0.192304967915841	up	-0.16993	0.00011163	\	H3K27me3 targets
ZCCHC3	0.215528550735725	0.0023996694822682	0.0504104121094254	up	-0.167527	0.00013988	\	\
FMO5	0.502257129708074	0.00115505593831129	0.0298450603628464	up	-0.165017	0.00017646	\	\
STS	0.212293361566231	0.000422399454993283	0.0135694990794446	up	-0.162874	0.00021463	\	\
VANGL2	0.309344904659362	0.00966976050814102	0.139630728272973	up	-0.16136	0.00024609	\	H3K27me3 targets
CACNA1G	0.398040247244959	0.00115334893435867	0.0298388684226253	up	-0.155302	0.00042045	\	H3K27me3 targets
SLC26A11	0.242628496881709	0.000613917711280509	0.0183588480277782	up	-0.154775	0.00044007	\	\
GAL3ST1	0.462433164484235	0.000000000195485454790852	0.0000000456919163582985	up	-0.15394	0.00047298	\	\
APLP1	0.33978012212604	0.00000000000988968923434483	0.00000000359119340322147	up	-0.15324	0.00050231	\	H3K27me3 targets
TTC28	0.202320351523172	0.0136034908574415	0.175665154958317	up	-0.152345	0.00054227	\	\
CDKN1C	0.861755700309754	0.00435364383569238	0.0778639818810946	up	-0.146865	0.00085871	\	H3K27me3 targets
LHPP	0.273889626953486	0.0151395109261419	0.188147383225847	up	-0.146753	0.00086665	\	\
AMPH	1.03031489566221	0.029021674710532	0.287880856213985	up	-0.145896	0.00092992	EZH2 target	H3K27me3 targets
BMF	0.516717653571086	0.0000164944642950365	0.000992274793157781	up	-0.144691	0.0010261	\	\
CHST7	0.24923323086207	0.00751678287355404	0.116238615767089	up	-0.144344	0.0010555	\	\
NFIA	0.257750625655151	0.0305866477739491	0.297194554858915	up	-0.143593	0.0011216	\	\
TMX4	0.214237321520165	0.000100021208834229	0.00429099426507182	up	-0.140432	0.0014443	\	H3K27me3 targets
GJB1	1.01451690224197	0.000651256917420308	0.0191932020518	up	-0.133596	0.0024525	\	\
TP53INP2	0.359372161465319	0.000000342207216428941	0.0000380261406889755	up	-0.133462	0.0024776	\	H3K27me3 targets
ANKRA2	0.234175092618732	0.0224769039940558	0.243121192935705	up	-0.133426	0.0024844	\	\
PRSS12	0.366495864240425	0.0352347256918018	0.320735091096478	up	-0.132696	0.0026251	EZH2 target	H3K27me3 targets
SEMA3E	0.437731113077079	0.0000126774324616941	0.000798128758849995	up	-0.132245	0.0027156	EZH2 target	H3K27me3 targets
KSR1	0.200364874876821	0.0153312896421978	0.188756602980063	up	-0.132084	0.0027485	\	H3K27me3 targets
IGFBP2	0.223160268338078	0.000134389247395788	0.00527568599574004	up	-0.131585	0.0028531	EZH2 target	H3K27me3 targets
CRTAC1	0.748980418359151	0.0380803442371365	0.334534908118181	up	-0.131267	0.0029216	EZH2 target	H3K27me3 targets
ADRA2A	1.77869921514615	0.00000150890467376587	0.000133989417209733	up	-0.130776	0.0030304	\	H3K27me3 targets
NAGLU	0.233085334374006	0.0000631099232938566	0.00299146920788012	up	-0.130151	0.0031741	\	\
FRY	0.618876058660881	0.000364040265061625	0.0120431827922597	up	-0.127466	0.003865	\	\
NEB	1.25181112316704	0.000000000000000000170027413692966	0.000000000000000203382791614498	up	-0.1197	0.0066953	\	\
ZNF703	0.239561633572336	0.000104677769190433	0.0044070857898291	up	-0.117791	0.0076283	\	H3K27me3 targets
PCBP3	0.733118644555213	0.0351356408534166	0.320539819091174	up	-0.116869	0.0081196	\	H3K27me3 targets
PLA2G4A	0.251782078157368	0.000000402202408422024	0.0000425978436211555	up	-0.116844	0.0081335	\	\
SLC12A2	0.277076080578624	0.00000000913727083802651	0.00000148645121993015	up	-0.115531	0.0088825	\	\
NDRG2	0.370067951575563	0.00510305516362419	0.0870558949264243	up	-0.114174	0.0097208	\	H3K27me3 targets
MYCBPAP	0.502915386372752	0.0338204430794013	0.313606342918206	up	-0.112165	0.011091	\	\
GSTA4	0.377458568044777	0.000321431163378461	0.0108505390615394	up	-0.109735	0.012975	\	\
SLC27A1	0.223587676834202	0.0318987518754249	0.303389904134999	up	-0.108127	0.014371	\	\
SCPEP1	0.22216030780816	0.0000794352425814281	0.00358129252726191	up	-0.108107	0.01439	\	H3K27me3 targets
CTTNBP2	0.442299662198985	0.0240763354361621	0.254063597083814	up	-0.107172	0.015262	EZH2 target	H3K27me3 targets
GXYLT1	0.269900086162709	0.000704470616438943	0.0203485937290993	up	-0.102537	0.020309	\	\
HCN2	0.441157842831194	0.00000000000428003415786411	0.00000000161174990000309	up	0.100942	0.022354	\	\
GPR137B	0.2812133342947	0.000045731358180861	0.00231719360543209	up	0.101925	0.021073	\	H3K27me3 targets
DHRS9	0.447849346997339	0.000107927790050317	0.00449735985793688	up	0.102394	0.020485	EZH2 target	H3K27me3 targets
RASA3	0.2620678434721	0.00543186778623956	0.0911361645488296	up	0.103837	0.018764	\	\
ZFP36	0.272629522857435	0.00064778742032198	0.0191730989168494	up	0.105135	0.017326	\	\
ATG9B	0.487859357879966	0.032982550634718	0.308367892945743	up	0.106325	0.016093	\	\
ST3GAL1	0.392284751429311	0.000000000152790639577539	0.0000000378902153147471	up	0.114559	0.0094759	\	H3K27me3 targets
NFATC2	0.573665100960625	0.000239723270372849	0.00844847955464796	up	0.122232	0.0056154	\	\
NR4A2	0.428935483223149	0.0000409400555502206	0.00211836139850823	up	0.122723	0.0054253	\	H3K27me3 targets
ROBO1	0.305221433264978	0.00010968711498542	0.00455201527189492	up	0.126855	0.0040401	\	H3K27me3 targets
STC1	0.496426888232919	0.00000166461023467005	0.000143952332697247	up	0.13121	0.002934	\	H3K27me3 targets
ONECUT2	0.373215264196519	0.000364275445390114	0.0120431827922597	up	0.135537	0.0021153	\	H3K27me3 targets
CPLX2	0.203837967967531	0.000000107382433559344	0.000014087882493092	up	0.137026	0.0018859	EZH2 target	H3K27me3 targets
TAPBPL	0.306940274404414	0.0467226345686153	0.380650951102881	up	0.139317	0.0015771	\	\
NET1	0.217223909209355	0.0000865370319623208	0.00381720291747027	up	0.141611	0.0013151	\	\
ZFP36L2	0.362724126058189	0.0000000000292597144871801	0.00000000901509536510315	up	0.14335	0.0011438	\	\
HHIPL2	0.378322880393224	0.000000569837089381725	0.0000579381860628869	up	0.145147	0.00098868	\	\
TNFRSF11A	0.259847740617378	0.0143718988419261	0.182413317656524	up	0.145503	0.00096031	EZH2 target	H3K27me3 targets
ITGA5	0.271477242149253	0.0219966966814482	0.239188019720495	up	0.154088	0.00046699	\	\
CNTNAP3	0.264329162670127	0.000639415152646727	0.0189817622322207	up	0.154339	0.00045698	\	\
STEAP1	0.214435596436176	0.00350524621018457	0.0666160576486947	up	0.156072	0.00039318	\	\
FKBP5	0.276838441140037	0.00395969022689265	0.0727292669799895	up	0.159004	0.00030377	\	\
SLC16A6	0.32925543323358	0.01569633172204	0.1915629179859	up	0.160567	0.00026426	\	H3K27me3 targets
LAMA3	0.201508606768091	0.00364775866621603	0.0685556122712596	up	0.160866	0.00025726	\	\
ITGA2	0.3187936569579	0.000000000237967327534268	0.0000000537673956156594	up	0.163058	0.00021106	\	\
SLC6A15	0.387197116943926	0.0000796038466841594	0.00358129252726191	up	0.173681	0.78015	\	H3K27me3 targets
PRR7	0.263534723438727	0.0144667761641462	0.182990486321473	up	0.176777	0.57717	\	\
VEGFC	0.255144858610597	0.0437455700868034	0.363951805565616	up	0.179194	0.45457	\	\
NFIL3	0.259663472897716	0.00981118334879348	0.140581377401409	up	0.180863	0.38472	\	H3K27me3 targets
L1CAM	0.249635908736034	0.0163932294123334	0.196786493565407	up	0.195231	0.086004	\	\
BATF3	0.307682038921445	0.0376617607406673	0.332834378383951	up	0.216943	0.0071961	\	H3K27me3 targets
OSBPL10	0.208090298890115	0.013558664181684	0.175503142033446	up	0.230096	0.0014053	\	\
TRIB1	0.298346542011883	0.00000977309701885338	0.00064315834264849	up	0.24202	0.00029304	\	\
ABLIM3	0.352556601697623	0.000263193673713997	0.00916445779961323	up	0.251736	7.6733e-05	\	\
LHX1	0.383110437751488	0.042181989717905	0.355415108759127	up	0.25686	3.6997e-05	\	\
MXD1	0.202401596771167	0.0453444954486798	0.372708292218635	up	0.262137	1.7162e-05	\	\
DSE	0.22498347066442	0.0124106920488906	0.165410629188726	up	0.286368	4.0368e-07	\	\
FBXO32	0.322607768882006	0.000212109094948631	0.00763405034651401	up	0.302093	2.896e-09	\	\
SPSB1	0.201450951615902	0.00416884380448628	0.075421208864972	up			\	\
CAMK2N1	0.289390533577706	0.000026739890107878	0.00149794949130495	up			\	\
NCMAP	0.91799822320883	0.000319536543974773	0.0108505390615394	up			\	\
ST6GALNAC3	1.06231631726207	0.0133530788403365	0.173964147528234	up			\	H3K27me3 targets
AKNAD1	1.4896497854837	0.0270222564903952	0.273381883448849	up			\	\
BCL9	0.293251476354427	0.0018313244467478	0.041655461548788	up			EZH2 target	\
ANXA9	0.318908678313041	0.0175353868769074	0.205522819678336	up			\	\
IL6R	0.338964675619074	0.00000053245223751958	0.0000544091268842245	up			\	\
PYHIN1	2.29766873925783	0.0194863152794247	0.220352748055891	up			EZH2 target	\
MPZ	0.706051633873254	0.000519655453335084	0.0162322483004131	up			\	H3K27me3 targets
NPL	0.324697204547842	0.0302248342083417	0.296060695388549	up			\	H3K27me3 targets
NMNAT2	0.356105817903519	0.00381533048458729	0.0708562632319097	up			\	H3K27me3 targets
NAV1	0.310650307783048	0.00574549947928588	0.0952198304085399	up			\	H3K27me3 targets
LGR6	0.289550222560758	0.0188816924980487	0.216436988132932	up			\	H3K27me3 targets
BTG2	0.259558319676175	0.00104426680569155	0.0276499550699709	up			\	\
GOLT1A	0.268994993728041	0.0495076588982428	0.394957434139855	up			\	\
CDK18	0.38202083983835	0.023331748417004	0.248925028362947	up			\	\
LPGAT1	0.205251129742872	0.00000420163988663971	0.000318807265279173	up			\	\
CHRM3	0.54408067764297	0.00849274008140159	0.126242594704168	up			EZH2 target	H3K27me3 targets
PLD5	0.272437428131626	0.00995677987152371	0.141942665905367	up			\	H3K27me3 targets
TRIB2	1.13067198387779	0.00241606002276357	0.050655558351993	up			EZH2 target	H3K27me3 targets
ADGRF3	0.847057426847849	0.000582835641104726	0.0176631337732706	up			\	\
SLC30A3	0.441231204230107	0.00851314755184586	0.126259469673801	up			\	H3K27me3 targets
QPCT	0.316027067733324	0.000000000237516249365021	0.0000000537673956156594	up			\	\
SFXN5	0.217656489980066	0.00466068923220858	0.0814919308142403	up			\	\
CTNNA2	1.43481962293923	0.0226932982465731	0.244680922504806	up			\	H3K27me3 targets
ATOH8	0.371308114459066	0.00592385534161774	0.0974608401066318	up			EZH2 target	H3K27me3 targets
IL1R1	0.463726449043569	0.0000000000000465005927196615	0.0000000000255564744041707	up			\	\
KIF5C	0.842077569420409	0.0000261201937204627	0.00147134110610972	up			\	H3K27me3 targets
GALNT5	0.247037352789627	0.00163049714136201	0.0384360939673414	up			\	\
PLA2R1	0.233020644819714	0.0266577833923767	0.270749758890267	up			\	\
SCN9A	0.21703553376995	0.0133484915198261	0.173964147528234	up			EZH2 target	H3K27me3 targets
FAM171B	0.268971554779126	0.00266708810342723	0.054181055527665	up			\	\
TMEFF2	0.954923492453183	0.000050030352910697	0.00248745043139126	up			\	H3K27me3 targets
ADAM23	0.302574998627133	0.0000316171222204097	0.00172368412963011	up			\	H3K27me3 targets
MAP2	0.457243953380948	0.0000289137513160891	0.00159339060437038	up			\	\
CPS1	0.28033870780135	0.000177360198277638	0.00661765070087298	up			\	\
PLCD4	0.320246657398924	0.0156693735998072	0.191399302538806	up			\	\
TM4SF20	0.215138358579537	0.0000174365237479028	0.00103373676505424	up			\	\
DNER	0.285988981035284	0.00561483198953936	0.0935115548790196	up			EZH2 target	H3K27me3 targets
C2orf72	0.348496666011024	0.000112584090264268	0.00465324690147131	up			\	H3K27me3 targets
ITPR1	0.291548662801713	0.000718943536863265	0.0206201929790049	up			\	\
VGLL4	0.21863667019141	0.00387818408088153	0.0716284044366267	up			\	\
GLB1	0.208834037791724	0.00000101559930400736	0.0000951714831658509	up			\	\
TRANK1	0.294864277420939	0.000882147529860864	0.0241783698617658	up			\	H3K27me3 targets
MANF	0.246397935825342	0.000198293578150737	0.00723931761525179	up			\	\
DNAH1	0.330253939191062	0.00474412217336814	0.0826664305016634	up			\	\
ARHGEF3	0.334499137250433	0.00119011230939557	0.0304458481005232	up			\	\
LSAMP	0.822145757025582	0.0158431156438166	0.192455051742539	up			EZH2 target	H3K27me3 targets
PDIA5	0.333170478324654	0.0000065895679554095	0.00046689499781621	up			\	\
CPNE4	0.437951763513496	0.00709621189886862	0.111688443470196	up			\	H3K27me3 targets
PCOLCE2	0.228890784228319	0.00296857550233334	0.0588589023655349	up			\	\
PAQR9	0.412820557707725	0.0424450229584736	0.356808409202382	up			\	\
KLHL24	0.226719160409116	0.00120316364424705	0.0306595647941901	up			\	\
ST6GAL1	0.355937139607056	0.00257798620099834	0.0527928996951674	up			\	\
BCL6	0.353086941474549	0.00000613186178041183	0.000435983948617743	up			\	\
XXYLT1	0.285300901902583	0.0034098342612076	0.0654141317940156	up			\	\
C4orf48	0.220858416142902	0.0382929834581958	0.33545935478005	up			\	\
CRMP1	0.370500560140264	0.000990102474676932	0.0266671971159674	up			EZH2 target	H3K27me3 targets
ANTXR2	0.333961784870412	0.00488290349949616	0.0845773787583088	up			\	H3K27me3 targets
ADH1C	1.46784224908361	0.00000154154571821292	0.000135702736709349	up			\	\
NPNT	0.412142707283044	0.0214768266039817	0.235358956936941	up			EZH2 target	H3K27me3 targets
HHIP	0.898126885120711	0.00276106697331429	0.0556454875147136	up			EZH2 target	H3K27me3 targets
DCHS2	0.945766183244358	0.0155670657477224	0.190581747128197	up			\	H3K27me3 targets
FGB	0.326948966724077	0.0374799671872219	0.332238505994838	up			\	\
FGA	0.232482680210243	0.00248870008356175	0.051751114537599	up			\	\
TMEM144	0.288626534072767	0.0000003658383621427	0.0000396590196429826	up			\	\
FNIP2	0.381224194063095	0.00168882945564419	0.0394286417686849	up			\	\
SPOCK3	0.947339209202553	0.0364001730446904	0.326365749058104	up			EZH2 target	H3K27me3 targets
GALNT7	0.215823188614725	0.0000847872179363748	0.00376451545138904	up			\	\
FBXL7	0.451838959748471	0.0364575876884737	0.326736467891191	up			EZH2 target	H3K27me3 targets
CDH6	0.469367321217532	0.0000114289711818286	0.000728552128471741	up			EZH2 target	H3K27me3 targets
ITGA1	0.39476315105912	0.00226017708975206	0.0482780473950716	up			\	\
ZSWIM6	0.201315799071735	0.0360798970707818	0.325074138439884	up			\	\
MAST4	0.272678803725464	0.000180659407558731	0.00672840485843735	up			EZH2 target	H3K27me3 targets
PIK3R1	0.203736899509046	0.0145848249371574	0.183441447686126	up			\	\
SSBP2	0.352370506281073	0.0246859084320634	0.258418900001655	up			\	H3K27me3 targets
VCAN	0.285383283051849	0.00000000134191411285774	0.000000248729873062586	up			\	H3K27me3 targets
GRAMD2B	0.546156810636056	0.00223616067481616	0.0478811492838648	up			\	H3K27me3 targets
NRG2	0.385251164612908	0.00678875897105135	0.108019885505735	up			\	H3K27me3 targets
PCDHA4	0.264430559688794	0.0241922913699644	0.254896500004263	up			\	\
FGFR4	0.266147194542626	0.0000711279704822833	0.00326498257281542	up			\	\
ATXN1	0.308123714904378	0.00291873166795273	0.0581886357527635	up			\	\
SOX4	0.290926972788279	0.000000310362504792205	0.0000352582208656396	up			\	\
KIAA0319	0.258617985412141	0.0000392683655381294	0.00204225629978992	up			\	\
MDGA1	0.218821727849904	0.0271425515112234	0.274189659702299	up			\	H3K27me3 targets
TTBK1	1.52639543529372	0.00764377163456261	0.117487601049759	up			\	H3K27me3 targets
BACH2	0.831134022020708	0.0177396069776751	0.206962081406209	up			EZH2 target	\
GRIK2	0.76654380583954	0.00649680000273992	0.104758724813329	up			\	\
MICAL1	0.265520395592497	0.000353303329804456	0.0118164855453513	up			\	\
FYN	0.275893276013656	0.0489285951315075	0.392982820405267	up			\	H3K27me3 targets
SLC2A12	0.338749136908681	0.000556375214699431	0.0171139118897349	up			\	\
UTRN	0.205993317974857	0.00158513911102983	0.0376707320624085	up			\	\
CREB5	0.679761262589662	0.0176220513890272	0.206182056959647	up			\	H3K27me3 targets
FKBP9	0.221612230403822	0.000000272110893771124	0.0000323589182738936	up			\	\
HERPUD2	0.248348471316665	0.000528420021166093	0.0164554688061447	up			\	\
ELMO1	0.342085801050233	0.00148728840354872	0.0360047734359087	up			\	H3K27me3 targets
PON3	0.30842794104907	0.000208666248365087	0.00754181100696562	up			\	\
LMTK2	0.226145479217167	0.0000136470819958924	0.000848664869683403	up			\	\
DNAJB9	0.266614757460556	0.0000324210904641566	0.00176278843472894	up			\	\
ZNF467	0.347796090611274	0.0159646330347344	0.193355343400068	up			\	\
FGL1	0.305836237147461	0.000364819306615784	0.0120431827922597	up			EZH2 target	\
PSD3	0.367150864116294	0.0000598519649702474	0.0028770743013743	up			\	\
STMN4	2.74646220566904	0.0241397875221213	0.254475157730604	up			\	\
SCARA5	0.338892797172341	0.0169320288738024	0.201234837608867	up			\	\
ZNF395	0.224097681308733	0.0210114840653723	0.2319923861936	up			\	H3K27me3 targets
SGK3	0.504885978578044	0.00663166313773245	0.106304260583778	up			\	H3K27me3 targets
CA13	0.42796919558994	0.0454496579334805	0.373270918448032	up			\	H3K27me3 targets
MMP16	0.73235331182976	0.0393932825687388	0.341313336614957	up			EZH2 target	H3K27me3 targets
CDH17	0.501862217198573	0.000000000000000000000000197008923230056	0.000000000000000000000572310921983313	up			\	\
ANGPT1	0.690747022470685	0.0259235428104803	0.266374554346193	up			\	\
PTP4A3	0.323228809778365	0.00117297899088236	0.0301708848130015	up			\	H3K27me3 targets
INSL4	0.316991247371228	0.0118451606687232	0.160996265597491	up			\	H3K27me3 targets
TTC39B	0.302519522022353	0.0183330094955379	0.212180846950348	up			\	H3K27me3 targets
AQP3	0.53475533414894	0.00000000000000024950056503329	0.000000000000195138230382767	up			\	H3K27me3 targets
FAM219A	0.244450603211965	0.00157583920318732	0.0376111387286552	up			\	\
RNF38	0.348923209144247	0.000055128904136119	0.00268836034917981	up			\	\
PGM5	0.370922243939145	0.0365340169448832	0.327133084356759	up			\	H3K27me3 targets
PCSK5	0.473881663320037	0.0000185398393575487	0.00108647732949785	up			\	H3K27me3 targets
RASEF	0.368015342582517	0.00000000906738431745856	0.00000148645121993015	up			\	H3K27me3 targets
CARD19	0.211515771254962	0.00812696441892849	0.122235075043573	up			\	\
SUSD1	0.213492329661716	0.00268464634286859	0.0544833167487353	up			\	\
MEGF9	0.204660435158485	0.00000936586208679922	0.00062444198536086	up			\	\
GSN	0.26254514930257	0.000000676596171908622	0.0000664665852935354	up			\	H3K27me3 targets
IER5L	0.214343441398676	0.000174938536690004	0.00653929254336625	up			\	\
NTNG2	0.760253273784869	0.0000340769594213343	0.00181877944838014	up			EZH2 target	H3K27me3 targets
CAMK1D	0.280802008642547	0.0020435963303239	0.0451885773509321	up			\	H3K27me3 targets
KIAA1217	0.209112324679643	0.00208898480434226	0.0457938426292131	up			\	H3K27me3 targets
A1CF	0.534151232756036	0.000065461437828679	0.00307788250199749	up			\	H3K27me3 targets
ANK3	0.248681692027326	0.0116957036743996	0.15994091070539	up			\	H3K27me3 targets
ARID5B	0.476489164008019	0.000569963885209441	0.0174506001366202	up			\	H3K27me3 targets
DNAJC12	0.243540543871977	0.00497231212961881	0.0857607863916867	up			\	\
ZCCHC24	0.324063440234629	0.011182458944164	0.154585521841995	up			\	\
HECTD2	0.252773582509257	0.0258592317743492	0.266132754000391	up			\	\
FRAT2	0.336679593980242	0.00491537346284157	0.0849949994616356	up			\	\
GOLGA7B	0.350815009684113	0.00390618758097696	0.0718844565241325	up			\	H3K27me3 targets
ENTPD7	0.39077773453862	0.00163686537377515	0.0384360939673414	up			\	H3K27me3 targets
CALY	1.89339208963516	0.00023052478738151	0.00819531739755771	up			\	H3K27me3 targets
CEND1	1.28318086840745	0.000000125938115209435	0.0000161066136653073	up			\	\
RASSF10	0.461907390524541	0.000105360588863231	0.00442232152315092	up			\	\
PDE3B	0.216464694832706	0.0285947329251237	0.284534443859676	up			\	H3K27me3 targets
NCR3LG1	0.362911285127609	0.000014545465635105	0.000893778973703006	up			\	H3K27me3 targets
TCN1	0.958904700996122	0.0000000000409482224994043	0.0000000117279169651463	up			EZH2 target	\
TMEM132A	0.252690592528681	0.000003783832666979	0.000294805506831487	up			\	\
PGM2L1	0.297687815473806	0.00000785716994152309	0.000545309046965433	up			\	\
FXYD2	0.371086511078623	0.00053180323788031	0.0165355028169665	up			\	\
FEZ1	0.756914076011637	0.0376195182780704	0.332699571355623	up			\	\
ADAMTS15	0.359866704069662	0.0131976276363943	0.173032725974261	up			\	H3K27me3 targets
PDE3A	0.2668723148185	0.0313234128874703	0.301877536050573	up			EZH2 target	H3K27me3 targets
CNTN1	0.378803406708089	0.000000000000000000000192869697407801	0.000000000000000000356545936071603	up			EZH2 target	\
CCDC184	0.381085184656986	0.000158529513628251	0.00604821324508534	up			\	\
LMBR1L	0.266020879073163	0.0024775372668348	0.0516230441585583	up			\	\
TUBA1A	0.236125236086013	0.000000163515431029479	0.0000205252240122497	up			\	\
ACVRL1	1.01780078670583	0.0160290492255243	0.194018283333951	up			\	\
ZNF385A	0.227025401914993	0.00516843431122828	0.0876564734936006	up			\	\
NR1H4	0.489294200298441	0.033247805246596	0.31027724630084	up			\	\
TBX3	0.381853423151239	0.00000165874191354091	0.000143952332697247	up			\	\
NOS1	0.717980567495131	0.00889456014711856	0.130927750353323	up			\	H3K27me3 targets
MLEC	0.277029234507963	0.00000000707125303029427	0.00000118837958984326	up			\	\
OASL	1.10882298877723	0.0104860777717488	0.147638165223647	up			\	H3K27me3 targets
CRYL1	0.259584733476811	0.0265598999531944	0.270473000041839	up			\	\
SPATA13	0.219948833240738	0.0422093674774178	0.355415108759127	up			\	H3K27me3 targets
DCLK1	0.722675180051013	0.0163856135434633	0.196786493565407	up			EZH2 target	H3K27me3 targets
ARHGEF40	0.210186336568954	0.0010441449792455	0.0276499550699709	up			\	H3K27me3 targets
NYNRIN	0.40502214144343	0.00476262406955868	0.0829177743617087	up			\	\
ATL1	0.207737267399822	0.0404868244567431	0.347237273440688	up			EZH2 target	H3K27me3 targets
TRIM9	0.254266459649062	0.0196773724260848	0.222176217814789	up			\	\
GALNT16	0.706078102882793	0.0255133177378863	0.263939131677769	up			\	H3K27me3 targets
SMOC1	0.203190351901175	0.00528848427117024	0.0892459150657649	up			\	H3K27me3 targets
TTC9	0.270767304829047	0.00212725893193684	0.0462156093813416	up			EZH2 target	H3K27me3 targets
TMEM63C	0.370418167081305	0.0479105925317837	0.386510545040243	up			\	\
BDKRB2	0.628557970031695	0.00000000000000406168949998905	0.00000000000258107674944616	up			\	\
CA12	0.242857819834591	0.0000000000494386251923221	0.0000000137717047025462	up			\	\
TLE3	0.372535281190879	0.000133721683670793	0.00527568599574004	up			\	H3K27me3 targets
LRRC49	0.455116391394232	0.000107601749394685	0.00449298064464256	up			\	\
STRA6	0.223675809573246	0.0000469125311521143	0.00236716208679465	up			\	\
CEMIP	0.519831035525177	0.0000000407782360959881	0.00000592303879294228	up			\	H3K27me3 targets
NTRK3	0.313177191835806	0.0000495737194297263	0.00247149828407155	up			EZH2 target	H3K27me3 targets
RHCG	0.262584895760088	0.00990909842719323	0.141503873958549	up			\	H3K27me3 targets
ZNF710	0.26054845580885	0.0226837889265011	0.244680922504806	up			\	\
SLCO3A1	0.242139332384952	0.000204047441946065	0.00740947273566649	up			EZH2 target	\
MMP2	0.856955724362741	0.000000000531552006661639	0.000000105971667210436	up			\	H3K27me3 targets
LPCAT2	0.362209800164751	0.0000122105415690632	0.000771122244741926	up			\	\
CES1	0.460453963688816	0.000000000341469408850846	0.000000071430510969497	up			\	\
ADGRG1	0.346618234148628	0.00000000757145749906066	0.00000126201301838851	up			\	\
TMEM170A	0.319651819167097	0.00175210880780416	0.0404562845629285	up			\	\
MAF	0.854022238669168	0.0000000643721293635696	0.00000909032812922353	up			\	H3K27me3 targets
RTN4RL1	0.546304112937454	0.0000861947617370834	0.00381037060852955	up			\	H3K27me3 targets
RAP1GAP2	0.357474469062808	0.000173874569870632	0.0065114905678072	up			\	H3K27me3 targets
FAM222B	0.201099615408312	0.00651874340208724	0.10487234737456	up			\	\
NR1D1	0.265081520546513	0.0199748361544764	0.224413421658165	up			\	\
IGFBP4	0.228157823931926	0.0108806151094386	0.151338788132992	up			\	\
HAP1	0.375325867990382	0.00682214923275371	0.108466305432406	up			\	H3K27me3 targets
CNTNAP1	0.288753118367472	0.00721915645292783	0.11318546373962	up			\	\
LRRC37A3	0.517003862196348	0.0110714414613888	0.153572825455213	up			\	H3K27me3 targets
ABCA8	1.57879193452503	0.032829009606984	0.30737773439624	up			\	\
RAB37	0.457403340732034	0.000000000288287617111189	0.0000000630357924081294	up			\	H3K27me3 targets
C1QTNF1	0.242524902049847	0.000039032555665395	0.00203519748578412	up			\	\
MIER2	0.25428219018502	0.0171970247561372	0.203264609254266	up			\	\
IZUMO4	0.658029337680839	0.0309390858153207	0.299166100834306	up			\	\
B3GNT3	0.318761206483865	0.0000682567948332818	0.00316839372352003	up			\	\
PRODH2	0.587222795978444	0.00836122338823187	0.124652109677196	up			\	\
FCGBP	0.255631956796387	0.00235801943384408	0.0496894561525588	up			\	\
CD79A	0.58394750253993	0.0328185430668923	0.30737773439624	up			\	H3K27me3 targets
BCL3	0.262551519463357	0.000510322995756841	0.0160184881224029	up			\	\
NECTIN2	0.287839217313279	0.0000000529210031182211	0.00000752551467418899	up			\	\
BBC3	0.283146608285517	0.000892319987512706	0.0243234945657787	up			\	H3K27me3 targets
CA11	0.355109902485227	0.00686778043027242	0.109021323223723	up			\	\
LRRC4B	0.399369213456572	0.0360965264401841	0.325074138439884	up			\	H3K27me3 targets
CD33	1.92539276107791	0.0400246524566318	0.344727364551295	up			\	\
SLC23A2	0.346982299472322	0.00000000000000177549507984734	0.00000000000116466749834502	up			\	\
SYNDIG1	0.85900732817547	0.0337085824078313	0.313283374434758	up			EZH2 target	H3K27me3 targets
CTSA	0.23915424492456	0.000000042203029946505	0.00000608651499263957	up			\	\
ETS2	0.352344511913103	0.00000000575332858529188	0.000000983142325898407	up			\	\
TPST2	0.234763966132367	0.0362216874904179	0.325339229292247	up			\	\
LARGE1	0.29033773458644	0.00223069037176462	0.0478811492838648	up			\	H3K27me3 targets
KCTD17	0.273047604786986	0.00528117370653267	0.0891965675434733	up			\	\
ELFN2	0.265272765121377	0.0158190580678114	0.192304967915841	up			\	\
BAIAP2L2	0.246056739619006	0.0314562682260077	0.302139580432264	up			\	\
TMEM184B	0.209459986640118	0.000680977158673126	0.0198675330295811	up			\	\
NAP1L2	0.244627751954796	0.0329582291529039	0.308367892945743	up			\	H3K27me3 targets
SRPX2	0.277395751599979	0.000656689147657352	0.0192973610081102	up			\	\
CCDC121	-0.413839746931486	0.0402655256808778	0.346107142776614	down	-0.220478	0.0046847	\	\		MCF2L
MYH14	-0.224846655791362	0.0104424871860496	0.14715729516862	down	-0.189943	0.15124	\	\		CCDC126
GFRA1	-0.455601176396067	0.000926357515433813	0.0251501736666844	down	-0.174563	0.71634	EZH2 target	H3K27me3 targets		TMX4
NUAK2	-0.484814376363253	0.0000000209758152268412	0.00000323638906524797	down	-0.171914	0.09245	\	\		SEMA3E
HCFC1R1	-0.249587116575209	0.00292229802667238	0.0582026742138911	down	-0.171037	0.0001005	\	\		IGFBP2
PPP1R3C	-0.280520683794344	0.00442319275563444	0.078561433354073	down	-0.153594	0.00048729	\	\		CTTNBP2
TIGD2	-0.300139712165539	0.00965904863221312	0.139630728272973	down	-0.1485	0.00074989	\	\		ST3GAL1
PDE8B	-0.502973546278769	0.0000447201545240403	0.00227915875249714	down	-0.146321	0.00089806	\	H3K27me3 targets		STC1
TUB	-0.437878790827134	0.000000693910989733843	0.0000678398075780659	down	-0.143497	0.0011303	\	\		SLC6A15
NXN	-0.280147208034914	0.00253598876659513	0.0523015533151237	down	-0.129777	0.0032633	\	H3K27me3 targets
MMP24	-0.375890049189748	0.000000850399733304649	0.0000819567705059243	down	-0.129513	0.0033273	\	\
VPS37C	-0.377599996961544	0.000355541929089155	0.0118545430490019	down	-0.128328	0.0036296	\	\
MGAM	-0.666904107974248	0.000133250044725805	0.00527568599574004	down	-0.110156	0.01263	\	\
LIMCH1	-0.311900319144219	0.000000000324108260128187	0.0000000686535569761113	down	-0.107672	0.01479	\	\
HSD17B8	-0.412785897474209	0.00747380750882691	0.115926678636152	down	-0.105471	0.016969	\	\
DCDC2	-0.441268792048558	0.00000168804513953941	0.000144837121993814	down	-0.104472	0.018048	\	\
POLR2L	-0.318206537064711	0.00000000000120029496730777	0.000000000498122411432726	down	-0.102196	0.020731	\	\
NXT2	-0.266759428256248	0.018991762442732	0.21695896204907	down	-0.102161	0.020775	\	\
ZNF469	-0.247447625793251	0.00256657927495667	0.0526122878591168	down	0.10109	0.022156	\	\
PSAT1	-0.244436074707163	0.000000339924845941966	0.0000380261406889755	down	0.102084	0.020872	\	\
TNS3	-0.430405403840957	0.000000000000000000861408999359481	0.000000000000000973152888998614	down	0.102533	0.020314	\	\
RINT1	-0.239686304372251	0.0145778341577678	0.183441447686126	down	0.103416	0.019253	\	\
ATAD5	-0.34026206678872	0.0247731152517774	0.25873718471746	down	0.104701	0.017796	\	\
CCL2	-0.423099816757194	0.000302181490175483	0.0103623281664729	down	0.105523	0.016915	\	\
PPIL1	-0.220156224815752	0.00921411578966801	0.134894920506047	down	0.106169	0.01625	\	\
TROAP	-0.243595007357524	0.0315424884037751	0.302139580432264	down	0.111791	0.011364	\	\
TFAP2A	-0.277221889097311	0.00130208094255961	0.0326081477425489	down	0.112439	0.010894	\	\
ZNHIT6	-0.260553124370337	0.00326738757552449	0.0633387286447002	down	0.112789	0.010648	\	\
POLD1	-0.312525023415196	0.000412153581800028	0.0133445228318001	down	0.113762	0.0099888	\	\
DAZAP1	-0.339910634068582	0.000000183336861604846	0.0000227326529313082	down	0.114588	0.0094577	\	\
FAM111B	-0.514494005212943	0.00130088067155415	0.0326081477425489	down	0.11629	0.0084421	\	\
AXL	-0.244460589293669	0.0000145483570344576	0.000893778973703006	down	0.117362	0.0078537	\	\
CCBE1	-1.13709671119298	0.00367212434849224	0.0689498140596397	down	0.118099	0.0074706	\	H3K27me3 targets
EFNB1	-0.317651449176362	0.00405800135636543	0.0739421662918378	down	0.118949	0.0070495	\	H3K27me3 targets
CXCL2	-0.54608359211138	0.0219454936309144	0.238898079756234	down	0.119367	0.0068503	\	\
ZWINT	-0.383121729511603	0.00000901565549181578	0.000607064087503556	down	0.120395	0.0063815	\	\
PIF1	-0.369295359955938	0.0358479795401703	0.324274316703453	down	0.121688	0.0058335	\	\
RBL1	-0.2342992811451	0.0145027035823455	0.183276579503769	down	0.122365	0.0055633	\	\
NAV3	-0.341191110773861	0.00000131135851453106	0.000118517668413285	down	0.12244	0.0055341	\	\
SASS6	-0.408260642330694	0.0152918233424426	0.188671757005466	down	0.122644	0.0054555	\	\
GREM1	-0.37189734890312	0.00000060168256906019	0.0000602719952799949	down	0.123196	0.0052475	EZH2 target	H3K27me3 targets
SAAL1	-0.2000896804182	0.0214732448897637	0.235358956936941	down	0.124624	0.0047423	\	\
PFKFB3	-0.203714592169496	0.00000983470395516055	0.000645124854607064	down	0.127034	0.0039882	\	\
SERPINB7	-0.874956395606833	0.00709050297609498	0.111685033322147	down	0.127699	0.0038001	\	\
PDGFB	-0.570335041697259	0.0414428724785475	0.353050520797751	down	0.130412	0.0031134	\	\
CCDC85B	-0.244963950656127	0.00732909380220185	0.114379986544723	down	0.13154	0.0028628	\	\
PNPT1	-0.274195489538876	0.0000253348602832095	0.00143106773294185	down	0.134709	0.0022536	\	\
ENO1	-0.226541987782063	0.000000000284836687355573	0.0000000629581960584301	down	0.134824	0.002234	\	\
CHAF1A	-0.268409711501633	0.0259621492869351	0.266636518055467	down	0.135248	0.0021626	\	\
PHF19	-0.22194862698255	0.00802228099625511	0.121198427978341	down	0.136205	0.0020094	\	\
RFC4	-0.33889071784316	0.00454690466972318	0.0803312827617906	down	0.137644	0.0017976	\	\
CENPM	-0.387152349169824	0.0095939528475933	0.139252698897794	down	0.138257	0.0017138	\	\
TGFB2	-0.619055703509847	0.00000000000000445712801899566	0.0000000000027465363110993	down	0.138312	0.0017064	\	\
PKP2	-0.396058955110595	0.00176963779891627	0.0407169316191933	down	0.144415	0.0010494	EZH2 target	H3K27me3 targets
POLR3D	-0.226790314506015	0.00158284546908013	0.0376707320624085	down	0.145384	0.00096971	\	\
FRMD6	-0.265111978176493	0.00786085650056817	0.119469743601684	down	0.146092	0.00091511	\	\
FANCI	-0.296919913574272	0.00000408958487656041	0.000312897780711622	down	0.146398	0.00089235	\	\
G2E3	-0.402643784299137	0.0000754738885418175	0.00342397066978678	down	0.146613	0.00087671	\	\
UBE2S	-0.269122658483433	0.0112521989356221	0.155338401463594	down	0.146777	0.00086499	\	\
DDX31	-0.216176702595094	0.0154456358345571	0.189437276656043	down	0.147288	0.0008292	\	\
CENPF	-0.210140171789503	0.000461087926826314	0.0146732754178609	down	0.148373	0.00075786	\	\
TUBA1B	-0.29047279682561	0.00000572318410465639	0.00041416707746686	down	0.149028	0.00071757	\	\
CSE1L	-0.243949316054059	0.00000443948581070769	0.000333125254467679	down	0.151296	0.00059286	\	\
ATP10A	-0.372667180160155	0.0203464862205229	0.22770819884113	down	0.154028	0.00046941	\	\
CDCA3	-0.336653191980652	0.00162749754458587	0.0384360939673414	down	0.155612	0.00040926	\	\
CDCA8	-0.218232708008965	0.0354793967248104	0.321942673984391	down	0.15567	0.00040721	\	\
FGFBP1	-0.421164602444155	0.0171967273915379	0.203264609254266	down	0.158694	0.00031223	\	\
SLC4A7	-0.251959321260671	0.000277254022669698	0.00958836828399372	down	0.161639	0.00023999	\	\
WDHD1	-0.335715255208481	0.00152220444154877	0.0365454867991668	down	0.162045	0.00023136	\	\
WWTR1	-1.63014102874767	0.0000000000000000000000000000000000036315318921376	0.000000000000000000000000000000036923600513309	down	0.162467	0.0002227	\	\
AP1S3	-0.30893027152496	0.00277209942594713	0.0558125166600346	down	0.162678	0.00021847	\	\
BNIP2	-0.23159435260004	0.000162902822496124	0.00619182971113773	down	0.162742	0.0002172	\	\
IQGAP3	-0.219744977096926	0.00336468639083077	0.0647925168158558	down	0.163288	0.0002067	\	\
RANBP1	-0.31405829826894	0.00000167065407015246	0.000143952332697247	down	0.163495	0.00020283	\	\
UHRF1	-0.629615240319002	0.000412771323393277	0.0133445228318001	down	0.165411	0.00017018	\	\
BUB1	-0.295255571271922	0.0000710915920547597	0.00326498257281542	down	0.168975	0.00012214	\	\
NUF2	-0.227716188275059	0.0384064010239165	0.336056008959269	down	0.169423	0.0001171	\	\
GPN3	-0.23248270272356	0.0156714944050707	0.191399302538806	down	0.172018	0.91533	\	\
SERPINE1	-0.410857824495448	0.000000936376003083607	0.000088153731586598	down	0.173697	0.77894	\	\
SFXN4	-0.208216510998373	0.00708527178200733	0.111685033322147	down	0.174098	0.74935	\	\
RECQL4	-0.224728084288262	0.0173006436088042	0.20406530613981	down	0.174602	0.71363	\	\
SEH1L	-0.262414638713489	0.00243564330618936	0.050850930833019	down	0.176454	0.59579	\	\
AKR1B1	-0.209949166557235	0.000000142865168228678	0.0000180444919001874	down	0.179049	0.46115	\	\
PLOD2	-0.234132313746364	0.000000366653341179283	0.0000396590196429826	down	0.17963	0.43527	\	\
TTK	-0.289012242648711	0.00796553997617941	0.12052027932709	down	0.180947	0.38151	\	\
PRC1	-0.340818902855912	0.0000000005680176675347	0.000000112142128828331	down	0.182529	0.32526	\	\
DTL	-0.536156695582414	0.00000590602553827371	0.000423398137478401	down	0.182837	0.31526	\	\
LDHA	-0.220265357693148	0.0000000243644924298092	0.00000369740263850874	down	0.183426	0.29696	\	\
KIF23	-0.34157390488727	0.00000298759432173259	0.000243010922129729	down	0.186772	0.21062	\	\
RRM2	-0.500302997199109	0.0000000000320111454330865	0.00000000957274474090904	down	0.188123	0.18302	\	\
LOXL2	-0.206623803804432	0.000321711767087396	0.0108505390615394	down	0.188309	0.17951	\	\
EXOSC5	-0.300426704551389	0.00016876245289731	0.00637878156071896	down	0.189292	0.16196	\	\
EBNA1BP2	-0.274981983308246	0.0000217077797342454	0.00123996545195472	down	0.191009	0.13515	\	\
UNG	-0.348693612891469	0.00000141897667084564	0.000127114055513859	down	0.192298	0.11785	\	\
HSP90AA1	-0.203405404960615	0.00000728221453155211	0.000508879149481485	down	0.194556	0.092514	\	\
DNAJC9	-0.243015446478277	0.0395329645463544	0.341795422640356	down	0.19539	0.084537	\	\
MRPL12	-0.326198722687141	0.0107239616351607	0.149835728037711	down	0.196054	0.078659	\	\
BIRC5	-0.205024561873839	0.00814164746377884	0.122363645462945	down	0.199936	0.051374	\	\
THOP1	-0.262250000626801	0.000587824857697055	0.0177087681203994	down	0.200677	0.047321	\	\
RACGAP1	-0.259045247180336	0.000114177903826103	0.0046844065005421	down	0.202034	0.040671	\	\
PFKP	-0.220367210510328	0.00000210298500895284	0.000176089560390637	down	0.202666	0.037886	\	\
PTPN11	-0.273669578038965	0.000000124908481277358	0.0000160760377643992	down	0.202755	0.037509	\	\
EXO1	-0.680839496602505	0.0000102716869302559	0.000665206222059727	down	0.207049	0.002303	\	\
CAV1	-0.404409612010919	0.000000000000000151793025495862	0.000000000000123468446938334	down	0.207466	0.021955	\	\
MTHFD1L	-0.273533680030708	0.000231080218920512	0.00820072644284225	down	0.210318	0.015777	\	\
DLGAP5	-0.271003430521672	0.000584044351268762	0.0176734254212058	down	0.216227	0.0078427	\	\
ANLN	-0.424639246093601	0.0000000000010227813596277	0.00000000044251614783041	down	0.217146	0.0070223	\	\
CKS2	-0.269007199340088	0.000103494090941824	0.00439387956710266	down	0.217757	0.0065228	\	\
STAT1	-0.368097480568209	0.000000000000021757633578462	0.0000000000130129846711184	down	0.22069	0.0045648	\	\
CENPE	-0.203049556981487	0.0236264916300532	0.250935102905903	down	0.220898	0.0044498	\	\
SHCBP1	-0.356233534866528	0.000164993363884117	0.00625958965407372	down	0.223947	0.0030533	\	\
PRMT3	-0.26775613321503	0.00290009202333365	0.0579875823937952	down	0.227513	0.0001952	\	\
FANCD2	-0.234822963111921	0.0319627472787849	0.303389904134999	down	0.22979	0.0014614	\	\
HMMR	-0.2719581493988	0.00165027588477297	0.0387062977126393	down	0.230488	0.0013364	\	\
GSTCD	-0.386285964009036	0.0124756467971122	0.165894628758446	down	0.231185	0.0001222	\	\
ZNF488	-0.486582014745327	0.0349335944523893	0.319726249567	down	0.232348	0.0010518	\	\
CCNB1	-0.287600193395454	0.0000006683926062871	0.0000659794351885834	down	0.239642	0.00040329	\	\
NIP7	-0.388282037151949	0.000000128252170069325	0.0000163000492397483	down	0.241788	0.00030232	\	\
MCM4	-0.286597381848094	0.0000014370372298417	0.000128167333635224	down	0.251632	7.7869e-05	\	\
CCNA2	-0.255842479037739	0.00463395087419778	0.08116398882585	down	0.255588	4.4407e-05	\	\
UMPS	-0.23156425217387	0.00149094916062665	0.0360504770289453	down	0.260167	2.2906e-05	\	\
GNL3	-0.204963995939527	0.00318888954320717	0.0622713738409911	down	0.262241	1.6901e-05	\	\
ATAD2	-0.33518174011207	0.0000106855402324004	0.000689810986113847	down	0.263705	1.3616e-05	\	\
PRR11	-0.313839233103291	0.000497241782035008	0.0156766071902045	down	0.265017	1.1203e-05	\	\
RPL22L1	-0.349874530674986	0.000256909936283262	0.00900735095572436	down	0.265784	9.9923e-06	\	\
TRIP13	-0.312208381874659	0.00112486615434721	0.0293685792550924	down	0.266656	8.769e-07	\	\
ARHGAP11A	-0.223092481321848	0.00270664890426368	0.0548204237731095	down	0.279593	1.1958e-06	\	\
HSPD1	-0.224642018153445	0.000000511852378749282	0.0000528351173698814	down	0.281246	9.1985e-07	\	\
MCM7	-0.231114748273804	0.0000401133877880807	0.00208088199150669	down	0.289627	2.3695e-07	\	\
TXNRD1	-0.296530865907492	0.0000000000000000926895181386025	0.0000000000000819496239716732	down	0.293097	1.3335e-07	\	\
NOC3L	-0.289542367414347	0.000443910139861446	0.0141709775417308	down	0.331463	1.3546e-10	\	\
SLC25A32	-0.224785691702818	0.00841444105164411	0.125353596179621	down	0.335263	6.4762e-11	\	\
RUVBL1	-0.222687605109646	0.000311340038849634	0.0106584169865443	down	0.349798	3.5002e-12	\	\
NOLC1	-0.229544438104761	0.00000822077245490172	0.000559095009600089	down	0.362981	2.1696e-13	\	\
LYAR	-0.358658178386901	0.00147186044246006	0.0357163270852331	down	0.373369	2.2107e-14	\	\
ATAD3A	-0.236366740006374	0.0214671950964628	0.235358956936941	down			\	\
CTPS1	-0.320574825603454	0.0000479327075708342	0.00241265249617058	down			\	\
PDZK1IP1	-0.972342788507482	0.000000360484117780778	0.0000396240245139033	down			\	\
ORC1	-0.347988974156495	0.0158794477940996	0.192686512284049	down			\	\
CDC7	-0.280394619694074	0.0427474331231218	0.358461464972652	down			\	\
ARHGAP29	-0.246136908855284	0.000167472657794196	0.00634181842876161	down			EZH2 target	\
PRPF3	-0.236743545226013	0.000212087968542085	0.00763405034651401	down			\	\
TAGLN2	-0.233989035810962	0.000000725586578651967	0.0000705971439085538	down			\	\
PEA15	-0.33496331564735	0.0000000000894465787988596	0.0000000236220283100625	down			\	\
NUCKS1	-0.205691674797869	0.00000172964920242463	0.000147164922725125	down			\	\
SLC35F3	-0.37629025401366	0.000668968485454167	0.019558043160063	down			\	\
CRIM1	-0.434469925055203	0.000000000000000000000449531647805491	0.000000000000000000703171235240358	down			\	\
EPAS1	-0.310129548745693	0.000000000161014270394317	0.000000038978871291291	down			\	\
CALM2	-0.219171663844861	0.00000153230959873718	0.000135476155175307	down			\	\
EFEMP1	-0.690245982726276	0.000431823780184768	0.0138503731388916	down			\	H3K27me3 targets
PTPN4	-0.202083068707166	0.0324269410476854	0.305031402165724	down			\	\
INHBB	-0.204079824143561	0.000271292939659294	0.00939819749228576	down			EZH2 target	H3K27me3 targets
CXCR4	-1.2011702400391	0.00000198149970556747	0.000167194176401305	down			EZH2 target	H3K27me3 targets
NDUFB3	-0.20072877102899	0.00668174165088656	0.106734655515144	down			\	\
SH3BP4	-0.248215285850669	0.0000486515202786378	0.00244278682682988	down			\	\
D2HGDH	-0.247438465609733	0.0215993411098323	0.236268209504271	down			\	\
PPARG	-0.244425964697237	0.00143329913954918	0.0349055544942904	down			EZH2 target	\
LSM3	-0.239764232423073	0.00231865597217144	0.049114447077194	down			\	\
RFTN1	-0.675015771435495	0.000130784175061836	0.00522131684814133	down			\	H3K27me3 targets
CCK	-0.591802753396481	0.0457084727843003	0.374818012234491	down			\	H3K27me3 targets
FLNB	-0.31670601191035	0.0000000000000248032893024655	0.0000000000144107110847324	down			\	\
FHIT	-0.511816499164904	0.0361350055527075	0.325074138439884	down			\	\
AMOTL2	-0.888221992264464	0.00000000000000000000000275712599310251	0.00000000000000000000700826963371744	down			\	\
CLDN1	-0.292052456824509	0.0000579169587790468	0.00280414608755218	down			\	\
SH3TC1	-0.245520303793053	0.0391989325715529	0.340936823713656	down			\	\
C4orf36	-0.53137766261136	0.00139236033219752	0.0342755812837955	down			\	\
AFF1	-0.224351081590151	0.0000136434170760136	0.000848664869683403	down			\	\
BANK1	-0.413815616501972	0.0230420174474711	0.247000223929533	down			\	\
SYNPO2	-0.212281298202495	0.0262980518416443	0.268991636322275	down			EZH2 target	H3K27me3 targets
FGF2	-0.386944892637912	0.000000100364584839608	0.0000132526872254119	down			\	\
INPP4B	-0.334387972083148	0.0000336813708272649	0.00180715217881908	down			EZH2 target	H3K27me3 targets
CBR4	-0.234101633283927	0.0153029463029429	0.188671757005466	down			\	\
SYNPO	-0.287925996373505	0.0000000326844051671596	0.0000048870395520161	down			\	\
WWC1	-0.372340837808921	0.000000011312077833342	0.00000181126852551976	down			\	\
SNRNP48	-0.20095561655894	0.0381305596910538	0.334534908118181	down			\	\
MICB	-0.550397466468094	0.00000103829529698821	0.0000968519947901619	down			\	\
CCND3	-0.287250213324122	0.000000859225484803109	0.0000824167463842982	down			\	\
ADGRG6	-0.452998914448974	0.0000000000000000121985247937771	0.0000000000000112753182582481	down			\	\
CNKSR3	-0.30622104003768	0.006420576980704	0.104033811077782	down			\	\
MAFK	-0.256403258209817	0.000140243878402576	0.00546114025670474	down			\	\
TMEM184A	-0.262625388065079	0.00446680900478803	0.0791224399933489	down			\	\
CYTH3	-0.255809131120892	0.0000174157637267161	0.00103373676505424	down			\	\
FIGNL1	-0.366543064209938	0.0019427762826464	0.0435092023211614	down			\	\
TMEM139	-1.2406244006595	0.0361761876218076	0.325074138439884	down			\	\
TCAF1	-0.26014832699804	0.00490769335629724	0.0849344207662165	down			\	\
ERI1	-0.260272473468734	0.00514158135383219	0.0874929345859227	down			\	\
SLC7A2	-0.249214676863776	0.0357463096872657	0.32383553620944	down			EZH2 target	\
CHMP7	-0.393047131515699	0.00000000400008917144349	0.000000695229173515413	down			\	\
LACTB2	-0.39204491058377	0.000000000941168524069118	0.000000182272970828052	down			\	\
CBWD1	-0.35468018095746	0.0412635913509475	0.352264958069487	down			\	\
PUM3	-0.206105222354314	0.00362972485782916	0.0684649068281415	down			\	\
NFIB	-0.273900966090881	0.00236468870025789	0.0497784106829651	down			\	\
RMI1	-0.292552310086396	0.0367776269462662	0.328446659618939	down			\	\
MSANTD3	-0.206297808072896	0.00780978553874931	0.119049466964368	down			\	\
TUBB4B	-0.292218865501206	0.0000000210082791547938	0.00000323638906524797	down			\	\
GATA3	-0.34945756792876	0.030154840165588	0.295659920331355	down			\	\
NPY4R2	-0.658464649816527	0.042420596111579	0.356750546703457	down			\	\
VSIR	-0.341748975838612	0.00451594435696246	0.0798536769555058	down			\	\
AVPI1	-0.321665853217543	0.00000977117372079052	0.00064315834264849	down			\	\
NT5C2	-0.251126959209948	0.00000346305728412708	0.000276161842638134	down			\	\
EEF1AKMT2	-0.444605738745563	0.0447440492307267	0.369514979806751	down			\	\
MRPL23	-0.220635641796294	0.0145107102533105	0.183276579503769	down			\	\
TEAD1	-0.311328153031943	0.00000000265724345926847	0.000000473991629335302	down			\	\
BCL9L	-0.208012747061037	0.0000677977008221493	0.00315536605829287	down			\	\
RASSF8	-0.289765241445987	0.00764325076183604	0.117487601049759	down			EZH2 target	\
KRT7	-0.566705725215072	0.0000000984196872002233	0.0000130951558191659	down			\	H3K27me3 targets
KRT83	-0.808497426220435	0.0000824379089135655	0.0036843403906755	down			\	\
KRT8	-0.350416294304027	0.000000000000000681526378579674	0.000000000000513290329941396	down			\	\
TIMELESS	-0.239789786909732	0.0000973128605854326	0.00420139494693158	down			\	\
SRGAP1	-0.348663904782664	0.0000068571183858285	0.000484164938804939	down			\	\
NUP107	-0.227710466806882	0.000648689060968397	0.0191730989168494	down			\	\
EEA1	-0.237064413109652	0.000654239674195822	0.0192532037261535	down			\	\
SOCS2	-0.393472974045047	0.00409905185518916	0.0745565469367366	down			\	H3K27me3 targets
SUDS3	-0.317103304716338	0.00000319142070410451	0.000255502126054981	down			\	\
RPL21	-0.206877739446029	0.000442098136532304	0.0141353232804786	down			\	\
GTF3A	-0.204214217225589	0.00253514071538501	0.0523015533151237	down			\	\
MBNL2	-0.316272409247615	0.000313439940359675	0.0106942972939832	down			\	\
SAMD4A	-0.346303282454107	0.00596623626272949	0.0980425300113824	down			\	\
NAA30	-0.206831274618116	0.00425903679004025	0.0767117033883688	down			\	\
SPTB	-0.357054318119418	0.0419374395271563	0.355036566521534	down			\	H3K27me3 targets
MOK	-0.228063272961485	0.0421315081300338	0.355391726317215	down			\	\
SNAPC5	-0.259623159030559	0.00249351559477646	0.051751114537599	down			\	\
TICRR	-0.233749163315288	0.035743718103456	0.32383553620944	down			\	\
CCDC78	-0.227792261442022	0.0405996049374042	0.348057743002578	down			\	\
TNFRSF12A	-0.441914396597242	0.000199642978478077	0.00726250441386709	down			\	\
EEF2KMT	-0.404414711821893	0.00525422962992014	0.0889631636339933	down			\	\
GPRC5B	-0.393475139559474	0.000000896557707415428	0.000085193929814452	down			\	\
KIFC3	-0.300550554769978	0.0000000128655379299342	0.00000202806754887761	down			\	\
CFAP20	-0.209365876421367	0.0114652892375286	0.157744693264645	down			\	\
DBNDD1	-0.255225138554527	0.000734750910375331	0.020955343285389	down			\	\
PIMREG	-0.230555160351054	0.0177522757739957	0.206991128362502	down			\	\
GID4	-0.382933934138296	0.00000510263369597575	0.00037731656802788	down			\	\
MRM1	-0.316351067251133	0.00106399495868059	0.0280626945327754	down			\	\
MAP3K14	-0.424467925129805	0.0000015777391395036	0.000138290195697438	down			\	\
SKA2	-0.237327876907127	0.00137846709148565	0.0341011293252563	down			\	\
MRPL58	-0.242930964674075	0.00211023739785953	0.0460425724093064	down			\	\
CEP131	-0.397520361771406	0.000648153289739495	0.0191730989168494	down			\	\
NDUFAF8	-0.217735093230125	0.0157754312789139	0.192304967915841	down			\	\
CCDC137	-0.208038776833862	0.00304211816833922	0.0600596824788135	down			\	\
PYCR1	-0.331429872630724	0.000103012980063597	0.00439154916057283	down			\	\
CENPX	-0.348329779035093	0.0000153151358529047	0.000932434992721008	down			\	\
SMAD7	-0.252528613895374	0.0432560503280377	0.360940411744213	down			\	\
FSTL3	-0.326019340019952	0.000000598214160560483	0.0000602212126485021	down			\	\
CEACAM21	-3.94681369276699	0.0494550361212679	0.394881138952895	down			\	H3K27me3 targets
PSG1	-3.59779998310811	0.0166247185139271	0.198510658238819	down			\	\
PPP1R13L	-0.249398745556776	0.0420595690266858	0.355391726317215	down			\	\
ATF5	-0.232501452621443	0.00425259318878379	0.0766635483102113	down			\	\
MCM8	-0.381336856460465	0.0000016679696763259	0.000143952332697247	down			\	\
SNX5	-0.299231165158924	0.000000000185252144861317	0.0000000438035158808708	down			\	\
DSN1	-0.253841772041524	0.021210621578722	0.233523546184792	down			\	\
JPH2	-0.76868683250735	0.0324381845365737	0.305031402165724	down			\	\
CHAF1B	-0.271365414498664	0.0446897592720294	0.369408470857019	down			\	\
PDXK	-0.298246512050773	0.000000000321362499935162	0.0000000686535569761113	down			\	\
ATXN10	-0.310802246279577	0.00000000024622078920735	0.0000000550208763574887	down			\	\
SLC25A6	-0.236974241545099	0.0000036649466429239	0.000287747837775512	down			\	\
POLA1	-0.275065702350904	0.00724222397147525	0.113459649044645	down			\	\
VMA21	-0.28380727717234	0.000233656574916	0.00827771158696318	down			\	\

## Sheet: GSEA siYAPsiTAZ
GSEA of genes modulated either by YAP or TAZ IN RNASEq GSE151200										si YAPUP_ MYC EZH2 H3K27M3BOUND	SITAZ UP_ MYC EZH2 H3K27M3BOUND
and BOUND BY MYC, EZH2, H3K27me3 (column K+columnL)
Enrichment FDR	nGenes	Pathway Genes	Fold Enrichment	Pathway	URL	Genes				TMEM59L	SORL1
0.0111999341107991	7	200	5.39094594594595	HALLMARK APICAL JUNCTION	http://www.gsea-msigdb.org/gsea/msigdb/cards/HALLMARK_APICAL_JUNCTION	CNTN1 VCAN MMP2 CDH6 ADAM23 SLC30A3 PIK3R3				MCF2L	SLC22A23
0.0218734735255803	6	199	4.64403096563901	HALLMARK IL2 STAT5 SIGNALING	http://www.gsea-msigdb.org/gsea/msigdb/cards/HALLMARK_IL2_STAT5_SIGNALING	APLP1 BATF3 TTC39B NFIL3 SCN9A SH3BGRL2				ABAT	CEACAM6
0.0218734735255803	6	200	4.62081081081081	HALLMARK KRAS SIGNALING DN	http://www.gsea-msigdb.org/gsea/msigdb/cards/HALLMARK_KRAS_SIGNALING_DN	NOS1 SLC30A3 IGFBP2 NR4A2 CAMK1D ENTPD7				SH3BGRL2	SELENBP1
0.0241113272761834	3	44	10.5018427518428	HALLMARK APICAL SURFACE	http://www.gsea-msigdb.org/gsea/msigdb/cards/HALLMARK_APICAL_SURFACE	MDGA1 RHCG RTN4RL1				FAM149A	TMEM59L
0.0657096721995335	5	200	3.85067567567568	HALLMARK EPITHELIAL MESENCHYMAL TRANSITION	http://www.gsea-msigdb.org/gsea/msigdb/cards/HALLMARK_EPITHELIAL_MESENCHYMAL_TRANSITION	VCAN MMP2 APLP1 CDH6 IGFBP2				CDKN1C	PIK3R3
0.0658596588812207	3	73	6.32987782302851	HALLMARK CHOLESTEROL HOMEOSTASIS	http://www.gsea-msigdb.org/gsea/msigdb/cards/HALLMARK_CHOLESTEROL_HOMEOSTASIS	ANXA13 ANTXR2 NFIL3				SEMA3E	MCF2L
0.067024681954938	4	143	4.30844830844831	HALLMARK UV RESPONSE DN	http://www.gsea-msigdb.org/gsea/msigdb/cards/HALLMARK_UV_RESPONSE_DN	FYN AMPH PIK3R3 MMP16				ADRA2A	PLEKHH2
0.0837214456953773	2	36	8.55705705705706	HALLMARK HEDGEHOG SIGNALING	http://www.gsea-msigdb.org/gsea/msigdb/cards/HALLMARK_HEDGEHOG_SIGNALING	CRMP1 TLE3				ROBO1	RAP1GAP
0.0837214456953773	2	36	8.55705705705706	HALLMARK ANGIOGENESIS	http://www.gsea-msigdb.org/gsea/msigdb/cards/HALLMARK_ANGIOGENESIS	VCAN STC1				MPZ	MAGED2
										TRIB2	SOX2
										C2orf72	CREB3L1
										RARB	TMEM130
										TRANK1	CST3
										MAST4	HPCAL4
										ANKDD1B	SDK1
										PKIB	AGR2
										FGL1	SRCIN1
										ANXA13	DISP1
										PTP4A3	SH3BGRL2
										ADGRB1	ACSS1
										NTNG2	FGFR2
										A1CF	SMARCD3
										PCDH15	LFNG
										CALY	CCDC107
										FGF11	SERINC2
										TTYH2	ZNF219
										RAB37	TNS1
										BBC3	FAM149A
										BRSK1	PCSK1N
											CCDC126
											ZCCHC3
											FMO5
											STS
											VANGL2
											CACNA1G
											SLC26A11
											GAL3ST1
											APLP1
											TTC28
											CDKN1C
											LHPP
											AMPH
											BMF
											CHST7
											NFIA
											TMX4
											GJB1
											TP53INP2
											ANKRA2
											PRSS12
											SEMA3E
											KSR1
											IGFBP2
											CRTAC1
											ADRA2A
											NAGLU
											FRY
											NEB
											ZNF703
											PCBP3
											PLA2G4A
											SLC12A2
											NDRG2
											MYCBPAP
											GSTA4
											SLC27A1
											SCPEP1
											CTTNBP2
											GXYLT1
											HCN2
											GPR137B
											DHRS9
											RASA3
											ZFP36
											ATG9B
											ST3GAL1
											NFATC2
											NR4A2
											ROBO1
											STC1
											ONECUT2
											CPLX2
											TAPBPL
											NET1
											ZFP36L2
											HHIPL2
											TNFRSF11A
											ITGA5
											CNTNAP3
											STEAP1
											FKBP5
											SLC16A6
											LAMA3
											ITGA2
											SLC6A15
											PRR7
											VEGFC
											NFIL3
											L1CAM
											BATF3
											OSBPL10
											TRIB1
											ABLIM3
											LHX1
											MXD1
											DSE
											FBXO32
											SPSB1
											CAMK2N1
											NCMAP
											ST6GALNAC3
											AKNAD1
											BCL9
											ANXA9
											IL6R
											PYHIN1
											MPZ
											NPL
											NMNAT2
											NAV1
											LGR6
											BTG2
											GOLT1A
											CDK18
											LPGAT1
											CHRM3
											PLD5
											TRIB2
											ADGRF3
											SLC30A3
											QPCT
											SFXN5
											CTNNA2
											ATOH8
											IL1R1
											KIF5C
											GALNT5
											PLA2R1
											SCN9A
											FAM171B
											TMEFF2
											ADAM23
											MAP2
											CPS1
											PLCD4
											TM4SF20
											DNER
											C2orf72
											ITPR1
											VGLL4
											GLB1
											TRANK1
											MANF
											DNAH1
											ARHGEF3
											LSAMP
											PDIA5
											CPNE4
											PCOLCE2
											PAQR9
											KLHL24
											ST6GAL1
											BCL6
											XXYLT1
											C4orf48
											CRMP1
											ANTXR2
											ADH1C
											NPNT
											HHIP
											DCHS2
											FGB
											FGA
											TMEM144
											FNIP2
											SPOCK3
											GALNT7
											FBXL7
											CDH6
											ITGA1
											ZSWIM6
											MAST4
											PIK3R1
											SSBP2
											VCAN
											GRAMD2B
											NRG2
											PCDHA4
											FGFR4
											ATXN1
											SOX4
											KIAA0319
											MDGA1
											TTBK1
											BACH2
											GRIK2
											MICAL1
											FYN
											SLC2A12
											UTRN
											CREB5
											FKBP9
											HERPUD2
											ELMO1
											PON3
											LMTK2
											DNAJB9
											ZNF467
											FGL1
											PSD3
											STMN4
											SCARA5
											ZNF395
											SGK3
											CA13
											MMP16
											CDH17
											ANGPT1
											PTP4A3
											INSL4
											TTC39B
											AQP3
											FAM219A
											RNF38
											PGM5
											PCSK5
											RASEF
											CARD19
											SUSD1
											MEGF9
											GSN
											IER5L
											NTNG2
											CAMK1D
											KIAA1217
											A1CF
											ANK3
											ARID5B
											DNAJC12
											ZCCHC24
											HECTD2
											FRAT2
											GOLGA7B
											ENTPD7
											CALY
											CEND1
											RASSF10
											PDE3B
											NCR3LG1
											TCN1
											TMEM132A
											PGM2L1
											FXYD2
											FEZ1
											ADAMTS15
											PDE3A
											CNTN1
											CCDC184
											LMBR1L
											TUBA1A
											ACVRL1
											ZNF385A
											NR1H4
											TBX3
											NOS1
											MLEC
											OASL
											CRYL1
											SPATA13
											DCLK1
											ARHGEF40
											NYNRIN
											ATL1
											TRIM9
											GALNT16
											SMOC1
											TTC9
											TMEM63C
											BDKRB2
											CA12
											TLE3
											LRRC49
											STRA6
											CEMIP
											NTRK3
											RHCG
											ZNF710
											SLCO3A1
											MMP2
											LPCAT2
											CES1
											ADGRG1
											TMEM170A
											MAF
											RTN4RL1
											RAP1GAP2
											FAM222B
											NR1D1
											IGFBP4
											HAP1
											CNTNAP1
											LRRC37A3
											ABCA8
											RAB37
											C1QTNF1
											MIER2
											IZUMO4
											B3GNT3
											PRODH2
											FCGBP
											CD79A
											BCL3
											NECTIN2
											BBC3
											CA11
											LRRC4B
											CD33
											SLC23A2
											SYNDIG1
											CTSA
											ETS2
											TPST2
											LARGE1
											KCTD17
											ELFN2
											BAIAP2L2
											TMEM184B
											NAP1L2
											SRPX2
											CCDC121
											MYH14
											GFRA1
											NUAK2
											HCFC1R1
											PPP1R3C
											TIGD2
											PDE8B
											TUB
											NXN
											MMP24
											VPS37C
											MGAM
											LIMCH1
											HSD17B8
											DCDC2
											POLR2L
											NXT2
											ZNF469
											PSAT1
											TNS3
											RINT1
											ATAD5
											CCL2
											PPIL1
											TROAP
											TFAP2A
											ZNHIT6
											POLD1
											DAZAP1
											FAM111B
											AXL
											CCBE1
											EFNB1
											CXCL2
											ZWINT
											PIF1
											RBL1
											NAV3
											SASS6
											GREM1
											SAAL1
											PFKFB3
											SERPINB7
											PDGFB
											CCDC85B
											PNPT1
											ENO1
											CHAF1A
											PHF19
											RFC4
											CENPM
											TGFB2
											PKP2
											POLR3D
											FRMD6
											FANCI
											G2E3
											UBE2S
											DDX31
											CENPF
											TUBA1B
											CSE1L
											ATP10A
											CDCA3
											CDCA8
											FGFBP1
											SLC4A7
											WDHD1
											WWTR1
											AP1S3
											BNIP2
											IQGAP3
											RANBP1
											UHRF1
											BUB1
											NUF2
											GPN3
											SERPINE1
											SFXN4
											RECQL4
											SEH1L
											AKR1B1
											PLOD2
											TTK
											PRC1
											DTL
											LDHA
											KIF23
											RRM2
											LOXL2
											EXOSC5
											EBNA1BP2
											UNG
											HSP90AA1
											DNAJC9
											MRPL12
											BIRC5
											THOP1
											RACGAP1
											PFKP
											PTPN11
											EXO1
											CAV1
											MTHFD1L
											DLGAP5
											ANLN
											CKS2
											STAT1
											CENPE
											SHCBP1
											PRMT3
											FANCD2
											HMMR
											GSTCD
											ZNF488
											CCNB1
											NIP7
											MCM4
											CCNA2
											UMPS
											GNL3
											ATAD2
											PRR11
											RPL22L1
											TRIP13
											ARHGAP11A
											HSPD1
											MCM7
											TXNRD1
											NOC3L
											SLC25A32
											RUVBL1
											NOLC1
											LYAR
											ATAD3A
											CTPS1
											PDZK1IP1
											ORC1
											CDC7
											ARHGAP29
											PRPF3
											TAGLN2
											PEA15
											NUCKS1
											SLC35F3
											CRIM1
											EPAS1
											CALM2
											EFEMP1
											PTPN4
											INHBB
											CXCR4
											NDUFB3
											SH3BP4
											D2HGDH
											PPARG
											LSM3
											RFTN1
											CCK
											FLNB
											FHIT
											AMOTL2
											CLDN1
											SH3TC1
											C4orf36
											AFF1
											BANK1
											SYNPO2
											FGF2
											INPP4B
											CBR4
											SYNPO
											WWC1
											SNRNP48
											MICB
											CCND3
											ADGRG6
											CNKSR3
											MAFK
											TMEM184A
											CYTH3
											FIGNL1
											TMEM139
											TCAF1
											ERI1
											SLC7A2
											CHMP7
											LACTB2
											CBWD1
											PUM3
											NFIB
											RMI1
											MSANTD3
											TUBB4B
											GATA3
											NPY4R2
											VSIR
											AVPI1
											NT5C2
											EEF1AKMT2
											MRPL23
											TEAD1
											BCL9L
											RASSF8
											KRT7
											KRT83
											KRT8
											TIMELESS
											SRGAP1
											NUP107
											EEA1
											SOCS2
											SUDS3
											RPL21
											GTF3A
											MBNL2
											SAMD4A
											NAA30
											SPTB
											MOK
											SNAPC5
											TICRR
											CCDC78
											TNFRSF12A
											EEF2KMT
											GPRC5B
											KIFC3
											CFAP20
											DBNDD1
											PIMREG
											GID4
											MRM1
											MAP3K14
											SKA2
											MRPL58
											CEP131
											NDUFAF8
											CCDC137
											PYCR1
											CENPX
											SMAD7
											FSTL3
											CEACAM21
											PSG1
											PPP1R13L
											ATF5
											MCM8
											SNX5
											DSN1
											JPH2
											CHAF1B
											PDXK
											ATXN10
											SLC25A6
											POLA1
											VMA21
