# Supplementary material for: The oncogenic axis YAP/MYC/EZH2 impairs PTEN tumor suppression activity enhancing lung tumorigenicity
Source: Cell Death Discov. 2024 Oct 25;10:452. doi: 10.1038/s41420-024-02216-8 (PMC11511861; doi:10.1038/s41420-024-02216-8)
Supplement: Supplementary file 3 — TABLE S2 [file 41420_2024_2216_MOESM3_ESM.xlsx]

## Sheet: TRANSCRIPTS
transcripts correlated to PTEN in https://www.cbioportal.org/results/coexpression?cancer_study_list=luad_tcga&Z_SCORE_THRESHOLD=2.0&RPPA_SCORE_THRESHOLD=2.0&profileFilter=mutations%2Cgistic%2Crppa_Zscores&case_set_id=luad_tcga_all&gene_list=PTEN&geneset_list=%20&tab_index=tab_visualize&Action=Submit
Correlated Gene	Cytoband	Spearman's Correlation	p-Value	q-Value
CHTF18	16p13.3	-0.466006	3.12605e-29	3.67605e-26
TRAF4	17q11.2	-0.461705	1.1683e-28	1.16778e-25
CAPN10	2q37.3	-0.450033	3.80892e-27	3.04576e-24
ARFGAP1	20q13.33	-0.449187	4.87873e-27	3.75118e-24
DHX34	19q13.32	-0.445219	1.542e-26	1.10094e-23
ADRM1	20q13.33	-0.443496	2.53029e-26	1.6861e-23
TEDC2	16p13.3	-0.440156	6.55335e-26	4.094e-23
ZGPAT	20q13.33	-0.439054	8.95245e-26	5.11338e-23
DDX12P	12p13.31	-0.435503	2.42551e-25	1.27601e-22
ZNF513	2p23.3	-0.430128	1.07216e-24	5.20602e-22
E4F1	16p13.3	-0.425737	3.54092e-24	1.57303e-21
KMT5C	19q13.42	-0.424105	5.49633e-24	2.38863e-21
GMEB2	20q13.33	-0.42394	5.74482e-24	2.4435e-21
ATG4B	2q37.3	-0.419009	2.13543e-23	8.05459e-21
SRRT	7q22.1	-0.418168	2.66591e-23	9.68607e-21
HCN3	1q22	-0.417427	3.23939e-23	1.13612e-20
TSEN54	17q25.1	-0.416866	3.75318e-23	1.27169e-20
SLC26A11	17q25.3	-0.415567	5.27208e-23	1.75657e-20
UCKL1	20q13.33	-0.414298	7.33805e-23	2.40484e-20
CCDC137	17q25.3	-0.409406	2.59038e-22	8.0913e-20
LINC01001	11p15.5	-0.409282	2.67369e-22	8.09845e-20
RAD9A	11q13.2	-0.407582	4.12292e-22	1.19451e-19
NAT9	17q25.2	-0.406924	4.87226e-22	1.3528e-19
PGP	16p13.3	-0.405686	6.66583e-22	1.80076e-19
WRAP73	1p36.32	-0.403668	1.10753e-21	2.87542e-19
C1ORF159	1p36.33	-0.403611	1.12349e-21	2.87945e-19
SMPD4BP	2q21.1	-0.403132	1.26665e-21	3.20527e-19
TEPSIN	17q25.3	-0.403067	1.28739e-21	3.21702e-19
PAFAH1B3	19q13.1	-0.40295	1.32571e-21	3.27189e-19
PRKRIP1	7q22.1	-0.401585	1.86414e-21	4.43642e-19
LINC01002	19p13.3	-0.400925	2.19656e-21	5.04729e-19
SMPD4	2q21.1	-0.400648	2.35279e-21	5.34484e-19
TBC1D3B	17q12	-0.400531	2.42193e-21	5.4401e-19
CDK5RAP3	17q21.32	-0.399734	2.95087e-21	6.48251e-19
CEP131	17q25.3	-0.3986	3.90529e-21	8.39469e-19
ALKBH6	19q13.12	-0.398053	4.46769e-21	9.43988e-19
CCHCR1	6p21.33	-0.398037	4.48596e-21	9.43988e-19
NUP85	17q25.1	-0.397652	4.93046e-21	1.01613e-18
RECQL4	8q24.3	-0.397134	5.59917e-21	1.13064e-18
OXLD1	17q25.3	-0.394413	1.08811e-20	2.09157e-18
KAT2A	17q21.2	-0.393883	1.23763e-20	2.35634e-18
TIGD3	11q13.1	-0.391883	2.00715e-20	3.64773e-18
DDX12B	12p13.31	-0.39164	2.1282e-20	3.79864e-18
TMEM184A	7p22.3	-0.391587	2.15506e-20	3.81255e-18
SAMD10	20q13.33	-0.39143	2.23836e-20	3.8575e-18
RHOT2	16p13.3	-0.390517	2.78712e-20	4.64312e-18
HES6	2q37.3	-0.389962	3.18354e-20	5.21656e-18
ERAL1	17q11.2	-0.389336	3.69719e-20	5.96053e-18
PNKP	19q13.33	-0.388814	4.18776e-20	6.64425e-18
DBF4B	17q21.31	-0.388131	4.92767e-20	7.63636e-18
RTKN	2p13.1	-0.386163	7.85642e-20	1.15484e-17
GPS1	17q25.3	-0.385783	8.59386e-20	1.25401e-17
ZFPL1	11q13.1	-0.385715	8.73338e-20	1.26514e-17
MSH5	6p21.33	-0.385524	9.13545e-20	1.30517e-17
NAA40	11q13.1	-0.385522	9.14031e-20	1.30517e-17
CIAO3	16p13.3	-0.38394	1.32585e-19	1.80307e-17
ARHGAP33	19q13.12	-0.38378	1.37639e-19	1.85915e-17
GPC2	7q22.1	-0.383412	1.50008e-19	2.01263e-17
TP53I13	17q11.2	-0.38305	1.63274e-19	2.17601e-17
WASH3P	15q26.3	-0.382885	1.69692e-19	2.24656e-17
TUBG1	17q21.31	-0.381822	2.17437e-19	2.84104e-17
DUS1L	17q25.3	-0.381719	2.22689e-19	2.88765e-17
CLASRP	19q13.32	-0.381696	2.23893e-19	2.88765e-17
SLC25A10	17q25.3	-0.38113	2.55388e-19	3.21099e-17
ZBTB17	1p36.13	-0.381065	2.59295e-19	3.23973e-17
ENTPD6	20p11.21	-0.380514	2.94622e-19	3.63567e-17
UQCC2	6p21.31	-0.379024	4.1574e-19	5.037e-17
WASH7P	1p36.33	-0.378537	4.65058e-19	5.46881e-17
DPH7	9q34.3	-0.378296	4.91585e-19	5.74695e-17
CDK3	17q25.1	-0.378116	5.12353e-19	5.95491e-17
UNK	17q25.1	-0.377995	5.26743e-19	6.08576e-17
BRICD5	16p13.3	-0.377289	6.19346e-19	6.99284e-17
MED24	17q21.1	-0.377256	6.24089e-19	6.99284e-17
RECQL5	17q25	-0.377242	6.26141e-19	6.99284e-17
SNRNP70	19q13.33	-0.375796	8.7132e-19	9.26519e-17
PTGES2	9q34.11	-0.374845	1.08172e-18	1.12628e-16
TMUB2	17q21.31	-0.374179	1.25826e-18	1.28994e-16
RNFT2	12q24.22	-0.374025	1.30296e-18	1.32895e-16
MTG2	20q13.33	-0.373378	1.50833e-18	1.52962e-16
FAAP100	17q25.3	-0.373359	1.51501e-18	1.52962e-16
TMEM94	17q25.1	-0.373154	1.58687e-18	1.58616e-16
PIDD1	11p15.5	-0.373086	1.61143e-18	1.60068e-16
NOL12	22q13.1	-0.373069	1.61741e-18	1.60068e-16
LEMD2	6p21.31	-0.372553	1.81716e-18	1.7895e-16
RNF25	2q35	-0.372504	1.8373e-18	1.80046e-16
CCDC150	2q33.1	-0.371633	2.23501e-18	2.14808e-16
NEURL4	17p13.1	-0.371391	2.36022e-18	2.23617e-16
MEN1	11q13	-0.370975	2.59116e-18	2.42056e-16
SMG5	1q22	-0.370385	2.95668e-18	2.71133e-16
TEDC1	14q32.33	-0.368446	4.55574e-18	3.97702e-16
SPINDOC	11q13.1	-0.368147	4.86851e-18	4.21326e-16
SLC25A39	17q21.31	-0.367912	5.12927e-18	4.40082e-16
TSSC4	11p15.5	-0.367892	5.15233e-18	4.40172e-16
C1ORF35	1q42.13	-0.367788	5.27195e-18	4.48475e-16
MXD3	5q35.3	-0.367418	5.72299e-18	4.78696e-16
TRMT2A	22q11.21	-0.36738	5.7706e-18	4.80667e-16
SNRPA	19q13.2	-0.367278	5.90275e-18	4.89634e-16
METTL22	16p13.2	-0.367001	6.27633e-18	5.18471e-16
HGS	17q25.3	-0.366502	7.00763e-18	5.67164e-16
PIF1	15q22.31	-0.366311	7.3083e-18	5.89114e-16
LIG1	19q13.33	-0.366286	7.34886e-18	5.90004e-16
C19ORF47	19q13.2	-0.366069	7.70897e-18	6.1644e-16
PTOV1	19q13.33	-0.365457	8.82091e-18	6.94247e-16
SS18L1	20q13.33	-0.364359	1.12233e-17	8.66277e-16
H2AX	11q23.3	-0.364258	1.14754e-17	8.82327e-16
RFNG	17q25.3	-0.363762	1.2791e-17	9.75972e-16
SLC35C2	20q13.12	-0.363699	1.29694e-17	9.85825e-16
TMUB1	7q36.1	-0.363626	1.31763e-17	9.97754e-16
SAPCD1	6p21.33	-0.363031	1.50023e-17	1.11078e-15
NFKBIB	19q13.2	-0.362474	1.69402e-17	1.24504e-15
PPAN	19p13.2	-0.36204	1.86153e-17	1.35323e-15
ZNF692	1q44	-0.361468	2.10739e-17	1.51543e-15
RBM10	Xp11.3	-0.360553	2.56903e-17	1.81475e-15
KLHL17	1p36.33	-0.360452	2.62606e-17	1.8485e-15
SLC66A1	1p36.13	-0.359873	2.97529e-17	2.07244e-15
NSUN5	7q11.23	-0.358814	3.737e-17	2.54887e-15
KIF22	16p11.2	-0.358554	3.95169e-17	2.65987e-15
TOMM40	19q13.32	-0.357561	4.8889e-17	3.24122e-15
ATXN7L2	1p13.3	-0.357026	5.4802e-17	3.58022e-15
HDGFL2	19p13.3	-0.356895	5.63614e-17	3.6701e-15
TAF6L	11q12.3	-0.356834	5.70954e-17	3.69383e-15
ZNF335	20q13.12	-0.356588	6.01652e-17	3.8183e-15
ASPSCR1	17q25.3	-0.356019	6.79195e-17	4.26974e-15
PHKG2	16p11.2	-0.355667	7.31901e-17	4.57232e-15
TROAP	12q13.12	-0.355544	7.5128e-17	4.66423e-15
SNRPB	20p13	-0.355408	7.7327e-17	4.78589e-15
ANKRD23	2q11.2	-0.35517	8.13369e-17	5.0031e-15
TBRG4	7p13	-0.354852	8.70117e-17	5.3032e-15
CYP2D7	22q13.2	-0.354813	8.77361e-17	5.31495e-15
NARF	17q25.3	-0.354792	8.81229e-17	5.32225e-15
NSUN5P1	7q11.23	-0.354262	9.85861e-17	5.88309e-15
SBK1	16p12.1	-0.354183	1.0023e-16	5.96338e-15
EME1	17q21.33	-0.354089	1.02245e-16	6.0525e-15
RGL3	19p13.2	-0.354085	1.02333e-16	6.0525e-15
ATG4D	19p13.2	-0.353621	1.12876e-16	6.61733e-15
SDR39U1	14q12	-0.352978	1.29224e-16	7.48786e-15
TIMM17B	Xp11.23	-0.352891	1.31613e-16	7.60428e-15
GET4	7p22.3	-0.352828	1.33368e-16	7.6615e-15
CDK5RAP1	20q11.21	-0.352828	1.3337e-16	7.6615e-15
E2F1	20q11.22	-0.352774	1.34911e-16	7.72779e-15
SRSF2	17q25.2	-0.352749	1.35624e-16	7.74648e-15
PABPC1L	20q13.12	-0.352578	1.40574e-16	8.0063e-15
CBX8	17q25.3	-0.352307	1.48803e-16	8.40315e-15
FAM136A	2p13.3	-0.352159	1.53514e-16	8.62052e-15
PTCD1	7q22.1	-0.352076	1.56191e-16	8.72914e-15
MTX1	1q22	-0.351884	1.62604e-16	9.01218e-15
WDR45B	17q25.3	-0.351872	1.63019e-16	9.01218e-15
HAUS5	19q13.12	-0.351868	1.63155e-16	9.01218e-15
NSUN5P2	7q11.23	-0.351181	1.88381e-16	1.03176e-14
PRPF40B	12q13.12	-0.35095	1.97694e-16	1.07686e-14
RSKR	17q11.2	-0.350756	2.05881e-16	1.11841e-14
ILKAP	2q37.3	-0.350555	2.14706e-16	1.16005e-14
ROMO1	20q11.22	-0.350481	2.18027e-16	1.17453e-14
ABHD11	7q11.23	-0.350227	2.29913e-16	1.23222e-14
PPP1R35	7q22.1	-0.350062	2.37917e-16	1.27171e-14
CLDN3	7q11.23	-0.349945	2.43826e-16	1.29982e-14
TOP3B	22q11.22	-0.349523	2.66187e-16	1.40405e-14
DDX27	20q13.13	-0.349423	2.71763e-16	1.42969e-14
ACOT8	20q13.12	-0.349065	2.92703e-16	1.53581e-14
FBXO46	19q13.32	-0.349048	2.9376e-16	1.53732e-14
KRTAP5-1	11p15.5	-0.348748	3.12645e-16	1.62597e-14
MYO19	17q12	-0.348585	3.23373e-16	1.67042e-14
DYNC2I2	9q34.11	-0.348235	3.47674e-16	1.77759e-14
TAFAZZIN	Xq28	-0.348015	3.63874e-16	1.85566e-14
CCS	11q13.2	-0.3477	3.88311e-16	1.97023e-14
LUC7L	16p13.3	-0.347641	3.9306e-16	1.98928e-14
SYNE4	19q13.12	-0.3469	4.57902e-16	2.29998e-14
PABPN1	14q11.2	-0.346545	4.92671e-16	2.4561e-14
DXO	6p21.33	-0.346454	5.01958e-16	2.49618e-14
LRWD1	7q22.1	-0.346338	5.14032e-16	2.54988e-14
SREBF1	17p11.2	-0.346104	5.39345e-16	2.66223e-14
DHRS13	17q11.2	-0.346071	5.4304e-16	2.67387e-14
NOC4L	12q24.33	-0.34602	5.48742e-16	2.6953e-14
MOGS	2p13.1	-0.345781	5.76366e-16	2.81715e-14
DTYMK	2q37.3	-0.345685	5.87797e-16	2.8594e-14
SNHG11	20q11.23	-0.345684	5.8787e-16	2.8594e-14
C19ORF73	19q13.33	-0.34529	6.37291e-16	3.08477e-14
STRN4	19q13.32	-0.344563	7.39441e-16	3.57057e-14
ANKRD13D	11q13.2	-0.344486	7.51199e-16	3.61861e-14
RNPS1	16p13.3	-0.344273	7.84471e-16	3.7698e-14
SUZ12P1	17q11.2	-0.343685	8.8434e-16	4.19925e-14
PSMC3IP	17q21.2	-0.343594	9.00845e-16	4.26748e-14
LRRC45	17q25.3	-0.343564	9.06329e-16	4.2785e-14
IGHMBP2	11q13.3	-0.343011	1.01429e-15	4.73756e-14
TELO2	16p13.3	-0.342815	1.05542e-15	4.90671e-14
SLC29A4	7p22.1	-0.342711	1.07785e-15	4.9878e-14
BCL2L12	19q13.33	-0.342343	1.16142e-15	5.33747e-14
PRR19	19q13.2	-0.342257	1.18168e-15	5.41813e-14
ACTR5	20q11.23	-0.34218	1.20033e-15	5.45772e-14
ABHD12	20p11.21	-0.342176	1.20124e-15	5.45772e-14
PAGR1	16p11.2	-0.34163	1.34143e-15	6.01269e-14
FAM50A	Xq28	-0.341573	1.35717e-15	6.06964e-14
CHMP4B	20q11.22	-0.341218	1.45787e-15	6.46756e-14
TJAP1	6p21.1	-0.341073	1.50108e-15	6.62546e-14
RPP21	6p22.1	-0.341021	1.51709e-15	6.68021e-14
FBXL19	16p11.2	-0.340709	1.61523e-15	7.05024e-14
HID1	17q25.1	-0.340365	1.73129e-15	7.51093e-14
ZMYND19	9q34.3	-0.340362	1.73205e-15	7.51093e-14
ATAT1	6p21.33	-0.340217	1.78329e-15	7.7164e-14
SLC29A2	11q13.2	-0.339867	1.91326e-15	8.22537e-14
WRAP53	17p13.1	-0.339836	1.92524e-15	8.2591e-14
ATAD3B	1p36.33	-0.338852	2.34467e-15	9.97282e-14
ATP2A1	16p11.2	-0.338284	2.62671e-15	1.11016e-13
SMUG1	12q13.13	-0.338209	2.66607e-15	1.12442e-13
G6PC3	17q21.31	-0.338125	2.7112e-15	1.13865e-13
CCDC154	16p13.3	-0.337988	2.7864e-15	1.16778e-13
PMM2	16p13.2	-0.337224	3.24442e-15	1.34284e-13
LINC00265	7p14.1	-0.337009	3.38596e-15	1.39564e-13
ZNF668	16p11.2	-0.336922	3.44499e-15	1.41705e-13
ADCK5	8q24.3	-0.336838	3.5031e-15	1.438e-13
CRACR2B	11p15.5	-0.336668	3.62315e-15	1.48423e-13
UNC119	17q11.2	-0.336609	3.6654e-15	1.49541e-13
RTEL1	20q13.33	-0.336284	3.90959e-15	1.58533e-13
RRP1	21q22.3	-0.336242	3.94235e-15	1.59537e-13
AURKAIP1	1p36.33	-0.335985	4.14785e-15	1.67177e-13
TAF6	7q22.1	-0.335099	4.94176e-15	1.96013e-13
GSS	20q11.22	-0.33505	4.99013e-15	1.9754e-13
NELFCD	20q13.32	-0.334854	5.1865e-15	2.04908e-13
PICK1	22q13.1	-0.334808	5.23322e-15	2.0607e-13
MRPL12	17q25.3	-0.334632	5.41808e-15	2.11963e-13
TACC3	4p16.3	-0.334518	5.54139e-15	2.15521e-13
AUP1	2p13.1	-0.334143	5.96514e-15	2.31103e-13
KIFC2	8q24.3	-0.334102	6.01401e-15	2.32546e-13
RALY	20q11.22	-0.334038	6.09056e-15	2.35051e-13
PAQR6	1q22	-0.333862	6.30406e-15	2.42355e-13
NDUFS8	11q13.2	-0.333361	6.95568e-15	2.66893e-13
SLC7A9	19q13.11	-0.333154	7.24431e-15	2.77435e-13
SKIC2	6p21.33	-0.332905	7.60582e-15	2.90168e-13
COMMD4	15q24.2	-0.332861	7.6713e-15	2.91186e-13
BRAT1	7p22.3	-0.332858	7.6762e-15	2.91186e-13
ARHGEF39	9p13.3	-0.33273	7.87072e-15	2.97999e-13
UQCC3	11q12.3	-0.33228	8.59383e-15	3.23539e-13
AXIN1	16p13.3	-0.332056	8.97875e-15	3.36762e-13
ZNF408	11p11.2	-0.33196	9.1482e-15	3.42475e-13
ANO9	11p15.5	-0.331702	9.61901e-15	3.59427e-13
AARSD1	17q21.31	-0.331616	9.78264e-15	3.6418e-13
MARCKSL1	1p35.1	-0.331289	1.04245e-14	3.85206e-13
SEC61A2	10p14	-0.331271	1.04612e-14	3.85849e-13
FOXRED1	11q24.2	-0.331045	1.09315e-14	4.00241e-13
TUBG2	17q21.2	-0.33068	1.17355e-14	4.28111e-13
NKIRAS2	17q21.2	-0.330517	1.21119e-14	4.40236e-13
NELFA	4p16.3	-0.33027	1.27076e-14	4.5938e-13
SARS2	19q13.2	-0.329979	1.34423e-14	4.81586e-13
MRPL55	1q42.13	-0.329667	1.42804e-14	5.0797e-13
PILRB	7q22.1	-0.32955	1.46066e-14	5.18651e-13
NUBP2	16p13.3	-0.32919	1.56604e-14	5.52145e-13
SNAPC4	9q34.3	-0.329145	1.57967e-14	5.55971e-13
LTO1	11q13.2	-0.329001	1.62423e-14	5.70651e-13
PSMB3	17q12	-0.328866	1.6669e-14	5.84265e-13
XRCC3	14q32.33	-0.328705	1.71933e-14	6.00895e-13
DGUOK	2p13.1	-0.328627	1.74569e-14	6.09041e-13
PUS1	12q24.33	-0.328579	1.76162e-14	6.13528e-13
ATAD3A	1p36.33	-0.328565	1.76646e-14	6.14143e-13
TBC1D3C	17q12	-0.328385	1.82869e-14	6.34676e-13
WDR90	16p13.3	-0.328301	1.85847e-14	6.43894e-13
CDH24	14q11.2	-0.328239	1.88084e-14	6.50516e-13
MRPS26	20p13	-0.328137	1.91812e-14	6.62265e-13
MRPL38	17q25.1	-0.327635	2.11226e-14	7.24291e-13
MCRS1	12q13.12	-0.327624	2.11677e-14	7.24595e-13
ZGLP1	19p13.2	-0.327468	2.18137e-14	7.45433e-13
INO80E	16p11.2	-0.327173	2.30801e-14	7.84684e-13
IRF3	19q13.33	-0.327133	2.32606e-14	7.88139e-13
SRRM5	19q13.31	-0.326747	2.50428e-14	8.42726e-13
ZNF341	20q11.22	-0.326739	2.50824e-14	8.42726e-13
ZBTB48	1p36.31	-0.326487	2.63195e-14	8.8133e-13
EIF2B4	2p23.3	-0.326087	2.84088e-14	9.40266e-13
RHPN1	8q24.3	-0.325948	2.91736e-14	9.62391e-13
KPTN	19q13.32	-0.325845	2.97543e-14	9.7832e-13
POLE	12q24.33	-0.325822	2.98847e-14	9.80993e-13
PSMA7	20q13.33	-0.325437	3.21609e-14	1.05314e-12
BRMS1	11q13.2	-0.325432	3.2188e-14	1.05314e-12
LINC01816	2p13.3	-0.325417	3.22811e-14	1.05446e-12
LIN37	19q13.12	-0.325246	3.33498e-14	1.08582e-12
PYY2	17q11.2	-0.324562	3.79789e-14	1.22854e-12
FASTK	7q36.1	-0.324496	3.84608e-14	1.24011e-12
MAP3K10	19q13.2	-0.324123	4.12734e-14	1.32439e-12
AP5Z1	7p22.1	-0.323966	4.25229e-14	1.36079e-12
CSNK1D	17q25.3	-0.323963	4.25439e-14	1.36079e-12
TERT	5p15.33	-0.323851	4.34607e-14	1.38568e-12
METTL17	14q11.2	-0.323751	4.42866e-14	1.40977e-12
WASH8P	12p13.33	-0.32372	4.45486e-14	1.41585e-12
RHBDD3	22q12.2	-0.323706	4.4669e-14	1.41743e-12
MAST2	1p34.1	-0.323591	4.56479e-14	1.44619e-12
EGFL8	6p21.32	-0.323104	5.00492e-14	1.57564e-12
CC2D1A	19p13.12	-0.323054	5.05283e-14	1.58823e-12
THOP1	19p13.3	-0.322872	5.22852e-14	1.63573e-12
TMEM177	2q14.2	-0.32266	5.44193e-14	1.69719e-12
TIMM50	19q13.2	-0.32262	5.48392e-14	1.70762e-12
SF3B4	1q21.2	-0.322459	5.65233e-14	1.75732e-12
MIIP	1p36.22	-0.322379	5.73763e-14	1.78107e-12
DDX39A	19p13.12	-0.321894	6.28611e-14	1.9368e-12
COPS7B	2q37.1	-0.321891	6.29021e-14	1.9368e-12
YJU2B	19p13.13	-0.321885	6.29678e-14	1.9368e-12
FBF1	17q25.1	-0.321884	6.29744e-14	1.9368e-12
ACIN1	14q11.2	-0.321788	6.41323e-14	1.96938e-12
GRIPAP1	Xp11.23	-0.321627	6.60935e-14	2.0265e-12
PLPP2	19p13.3	-0.321615	6.62478e-14	2.02811e-12
PYCR3	8q24.3	-0.321597	6.64695e-14	2.03179e-12
MRGBP	20q13.33	-0.321447	6.83714e-14	2.08038e-12
JMJD6	17q25.1	-0.321399	6.89879e-14	2.09595e-12
MBLAC1	7q22.1	-0.321361	6.94811e-14	2.10773e-12
RCE1	11q13.2	-0.321286	7.04664e-14	2.13439e-12
AURKB	17p13.1	-0.32114	7.24202e-14	2.19024e-12
ANKS3	16p13.3	-0.320982	7.45979e-14	2.2493e-12
SGTA	19p13.3	-0.320882	7.60098e-14	2.28842e-12
U2AF1L4	19q13.12	-0.320782	7.74416e-14	2.32104e-12
MRPL27	17q21.33	-0.320762	7.77328e-14	2.32357e-12
KIF18B	17q21.31	-0.320749	7.79162e-14	2.32357e-12
COASY	17q21.2	-0.320744	7.7991e-14	2.32357e-12
IDH2	15q26.1	-0.320728	7.82321e-14	2.32729e-12
DNMT3B	20q11.21	-0.320674	7.90229e-14	2.34732e-12
ARL 16.00	17q25.3	-0.320228	8.58936e-14	2.53633e-12
PIGU	20q11.22	-0.319908	9.11702e-14	2.68818e-12
SMIM45	22q13.2	-0.319765	9.36341e-14	2.75271e-12
AP4M1	7q22.1	-0.319696	9.48538e-14	2.78447e-12
SIGIRR	11p15.5	-0.319486	9.86449e-14	2.88728e-12
TONSL	8q24.3	-0.319404	1.00158e-13	2.92727e-12
GLI4	8q24.3	-0.319356	1.01052e-13	2.9491e-12
ST14	11q24.3	-0.319342	1.01319e-13	2.95257e-12
SNHG20	17q25.2	-0.319243	1.03203e-13	3.0031e-12
YDJC	22q11.21	-0.319125	1.05489e-13	3.06516e-12
SIRT6	19p13.3	-0.319096	1.06075e-13	3.07771e-12
FLAD1	1q21.3	-0.319027	1.0744e-13	3.11281e-12
RBM14	11q13.2	-0.318933	1.09321e-13	3.15815e-12
CPT1B	22q13.33	-0.318813	1.11794e-13	3.22028e-12
POLR2J	7q22.1	-0.318635	1.15556e-13	3.32385e-12
LAGE3	Xq28	-0.318554	1.17312e-13	3.36953e-12
PELP1	17p13.2	-0.318335	1.22178e-13	3.49924e-12
DDX11	12p11.21	-0.318243	1.24259e-13	3.54865e-12
C20ORF96	20p13	-0.318227	1.24633e-13	3.55427e-12
OGFR	20q13.33	-0.318199	1.25279e-13	3.56533e-12
PPIL2	22q11.21	-0.31769	1.37661e-13	3.88699e-12
PPP4C	16p11.2	-0.317476	1.43218e-13	4.02117e-12
BOLA2	16p11.2	-0.317201	1.50691e-13	4.21324e-12
MZT2B	2q21.1	-0.317069	1.54423e-13	4.31156e-12
ZNF48	16p11.2	-0.316922	1.58673e-13	4.41786e-12
CCDC24	1p34.1	-0.316796	1.62398e-13	4.5153e-12
THOC1	18p11.32	-0.316408	1.74414e-13	4.83593e-12
SLC35A2	Xp11.23	-0.31596	1.89422e-13	5.20872e-12
RCCD1	15q26.1	-0.315879	1.92239e-13	5.27892e-12
LRRC14	8q24.3	-0.315821	1.94324e-13	5.32452e-12
CHTOP	1q21.3	-0.315725	1.97761e-13	5.40825e-12
NDUFV1	11q13.2	-0.314769	2.35635e-13	6.38291e-12
LSMEM1	7q31.1	-0.314705	2.38431e-13	6.44991e-12
LPIN3	20q12	-0.314665	2.40156e-13	6.48777e-12
FOXH1	8q24.3	-0.314264	2.5843e-13	6.9346e-12
GPS2	17p13.1	-0.314056	2.68456e-13	7.19398e-12
MAGEF1	3q27.1	-0.313935	2.74443e-13	7.33475e-12
STK25	2q37.3	-0.313894	2.76489e-13	7.37957e-12
PRSS50	3p21.31	-0.313753	2.83687e-13	7.56159e-12
REM2	14q11.2	-0.313568	2.93438e-13	7.81107e-12
ZNF76	6p21.31	-0.313406	3.02186e-13	8.02257e-12
MST1	3p21.31	-0.313294	3.08449e-13	8.178e-12
NINL	20p11.21	-0.313068	3.21407e-13	8.47658e-12
PAK4	19q13.2	-0.312599	3.49937e-13	9.19264e-12
PKMYT1	16p13.3	-0.312435	3.60515e-13	9.44569e-12
RAE1	20q13.31	-0.312247	3.73029e-13	9.73529e-12
TAF1C	16q24.1	-0.312192	3.76794e-13	9.82071e-12
PCNX3	11q13.1	-0.312008	3.89517e-13	1.00997e-11
TMEM201	1p36.22	-0.31194	3.9438e-13	1.02125e-11
MCM7	7q22.1	-0.311871	3.99321e-13	1.03271e-11
LSM 7.00	19p13.3	-0.311814	4.03504e-13	1.04218e-11
JMJD4	1q42.13	-0.311689	4.12685e-13	1.06451e-11
B3GAT3	11q12.3	-0.311501	4.26976e-13	1.09713e-11
LYG1	2q11.2	-0.310877	4.77885e-13	1.22565e-11
GTPBP2	6p21.1	-0.31087	4.78515e-13	1.22565e-11
PEX14	1p36.22	-0.310825	4.82344e-13	1.23306e-11
MIGA2	9q34.11	-0.310715	4.92029e-13	1.25621e-11
TRPV1	17p13.2	-0.310671	4.95947e-13	1.2646e-11
SCAND1	20q11.23	-0.310566	5.05449e-13	1.28555e-11
SNRNP25	16p13.3	-0.310534	5.08311e-13	1.29119e-11
VPS16	20p13	-0.310447	5.16338e-13	1.30991e-11
ZSWIM1	20q13.12	-0.310407	5.20072e-13	1.31605e-11
DNASE1	16p13.3	-0.310217	5.38248e-13	1.35689e-11
OTUB1	11q13.1	-0.310094	5.50245e-13	1.3819e-11
POLR2H	3q27.1	-0.310074	5.52242e-13	1.38518e-11
ZNF789	7q22.1	-0.309615	5.99677e-13	1.501e-11
TMEM120B	12q24.31	-0.309613	5.9992e-13	1.501e-11
HRAS	11p15.5	-0.309457	6.16895e-13	1.53962e-11
HSD17B10	Xp11.22	-0.309325	6.31691e-13	1.56871e-11
DDX39B	6p21.33	-0.30912	6.55311e-13	1.62133e-11
AAAS	12q13.13	-0.309009	6.6847e-13	1.65184e-11
U2AF2	19q13.42	-0.308998	6.69766e-13	1.653e-11
TRAIP	3p21.31	-0.308961	6.74248e-13	1.65996e-11
NPLOC4	17q25.3	-0.308892	6.82664e-13	1.67655e-11
TARBP2	12q13.13	-0.308875	6.84714e-13	1.67952e-11
TBC1D3H	17q12	-0.30883	6.90235e-13	1.69099e-11
POLD1	19q13.3	-0.308789	6.95318e-13	1.70136e-11
NDUFS6	5p15.33	-0.308504	7.31716e-13	1.7817e-11
THAP3	1p36.31	-0.308244	7.66416e-13	1.85714e-11
ASMTL-AS1	Xp22.33 and Yp11.32	-0.308217	7.70251e-13	1.86418e-11
CCDC167	6p21.2	-0.308167	7.77063e-13	1.87839e-11
TIMM44	19p13.2	-0.307884	8.17338e-13	1.97098e-11
DNMT3A	2p23.3	-0.307846	8.22873e-13	1.97955e-11
ANAPC11	17q25.3	-0.307774	8.33551e-13	2.00042e-11
GGA1	22q13.1	-0.30767	8.49028e-13	2.03512e-11
CLK2	1q22	-0.307472	8.79593e-13	2.10083e-11
BCS1L	2q35	-0.307361	8.97097e-13	2.14008e-11
LRP5L	22q11.23	-0.307098	9.40031e-13	2.23716e-11
CCNO	5q11.2	-0.307057	9.46889e-13	2.2508e-11
TBCD	17q25.3	-0.306879	9.77377e-13	2.31228e-11
MRPL28	16p13.3	-0.306604	1.02625e-12	2.4193e-11
RBBP8NL	20q13.33	-0.306577	1.03122e-12	2.42816e-11
ARVCF	22q11.21	-0.306477	1.04973e-12	2.46305e-11
MATCAP1	16q22.1	-0.306394	1.06526e-12	2.49657e-11
CENPT	16q22.1	-0.30632	1.07934e-12	2.5266e-11
CHRNA10	11p15.4	-0.306239	1.09493e-12	2.55113e-11
ALYREF	17q25.3	-0.306135	1.1153e-12	2.59255e-11
ZC3H3	8q24.3	-0.305958	1.15085e-12	2.67209e-11
KHDC1	6q13	-0.30572	1.20031e-12	2.78046e-11
PSMC4	19q13.11-q13.13	-0.305617	1.22235e-12	2.81844e-11
ITPA	20p13	-0.305569	1.2328e-12	2.83915e-11
TMEM259	19p13.3	-0.305449	1.25914e-12	2.89154e-11
TRMT1	19p13.13	-0.305375	1.27578e-12	2.92479e-11
LLGL2	17q25.1	-0.305358	1.27958e-12	2.92679e-11
ZNF707	8q24.3	-0.305343	1.28283e-12	2.93085e-11
OVOL2	20p11.23	-0.305309	1.29063e-12	2.94531e-11
EWSR1	22q12.2	-0.30523	1.30871e-12	2.98316e-11
SMG9	19q13.31	-0.305167	1.32339e-12	3.0132e-11
TNFRSF25	1p36.31	-0.305143	1.32892e-12	3.02234e-11
FER1L4	20q11.22	-0.305073	1.34561e-12	3.05336e-11
PCED1A	20p13	-0.304877	1.3928e-12	3.15685e-11
U2AF1	21q22.3	-0.304673	1.44377e-12	3.26867e-11
SLC25A45	11q13.1	-0.304546	1.47657e-12	3.33538e-11
TBC1D3	17q12	-0.304332	1.53307e-12	3.45131e-11
LY6G5B	6p21.33	-0.304215	1.565e-12	3.51924e-11
PPP1R16A	8q24.3	-0.304059	1.60862e-12	3.60515e-11
RBM42	19q13.12	-0.303953	1.63879e-12	3.66455e-11
RPS6KB2	11q13.2	-0.303943	1.64167e-12	3.66688e-11
DAZAP1	19p13.3	-0.303925	1.64676e-12	3.67414e-11
BANF1	11q13.1	-0.303906	1.65244e-12	3.68272e-11
WASH5P	19p13.3	-0.303651	1.72793e-12	3.8424e-11
KMT2E-AS1	7q22.3	-0.303645	1.72988e-12	3.84246e-11
MKS1	17q22	-0.303496	1.77553e-12	3.93946e-11
MCRIP2	16p13.3	-0.303389	1.80914e-12	4.00514e-11
CADM4	19q13.31	-0.303294	1.83956e-12	4.05901e-11
WDR62	19q13.12	-0.303248	1.85454e-12	4.08754e-11
CCNF	16p13.3	-0.303206	1.86801e-12	4.10818e-11
THAP7	22q11.21	-0.303089	1.90675e-12	4.18877e-11
PDRG1	20q11.21	-0.30291	1.96735e-12	4.30771e-11
PRPF31	19q13.42	-0.302731	2.02993e-12	4.43501e-11
PEX16	11p11.2	-0.302255	2.20582e-12	4.7931e-11
LYPLA2	1p36.11	-0.301804	2.38653e-12	5.16535e-11
LSM14B	20q13.33	-0.301802	2.38747e-12	5.16535e-11
PSMG3	7p22.3	-0.301448	2.53896e-12	5.47406e-11
OGFOD2	12q24.31	-0.301443	2.54111e-12	5.47406e-11
SPPL2B	19p13.3	-0.301409	2.55608e-12	5.50039e-11
KIFC1	6p21.32	-0.30105	2.72083e-12	5.83505e-11
STK36	2q35	-0.301045	2.72328e-12	5.83505e-11
CDC45	22q11.21	-0.300933	2.77681e-12	5.94338e-11
CTSV	9q22.33	-0.300795	2.84377e-12	6.06385e-11
BUD23	7q11.23	-0.300793	2.84523e-12	6.06385e-11
EMC9	14q12	-0.300769	2.85703e-12	6.08253e-11
RBM38	20q13.31	-0.300705	2.88889e-12	6.14381e-11
TIGD5	8q24.3	-0.30068	2.90128e-12	6.15705e-11
PPP2R3B	Xp22.3 and Yp11.3	-0.300673	2.90484e-12	6.15807e-11
ZNF512B	20q13.33	-0.300638	2.92241e-12	6.18483e-11
ZNF446	19q13.43	-0.300513	2.98651e-12	6.31112e-11
MZT2A	2q21.1	-0.300502	2.99208e-12	6.31624e-11
POLR2I	19q13.12	-0.300421	3.03457e-12	6.39243e-11
SEM1	7q21.3	-0.300384	3.0539e-12	6.42637e-11
SCRIB	8q24.3	-0.300282	3.10835e-12	6.53407e-11
TRMU	22q13.31	-0.299824	3.36488e-12	7.03632e-11
RAB26	16p13.3	-0.299704	3.43509e-12	7.15322e-11
PSMB6	17p13.2	-0.299644	3.4713e-12	7.2211e-11
SCNM1	1q21.3	-0.29954	3.53413e-12	7.34324e-11
CCDC57	17q25.3	-0.299526	3.54246e-12	7.34619e-11
NT5C	17q25	-0.299475	3.57383e-12	7.3959e-11
CEMP1	16p13.3	-0.299406	3.61672e-12	7.4692e-11
PRPF3	1q21.2	-0.299388	3.62774e-12	7.48423e-11
CENPX	17q25.3	-0.299189	3.75497e-12	7.73872e-11
RABL6	9q34.3	-0.298988	3.88708e-12	8.00274e-11
AKAP8L	19p13.12	-0.298841	3.98689e-12	8.18295e-11
PFDN6	6p21.32	-0.29874	4.05695e-12	8.3182e-11
SRCIN1	17q12	-0.298531	4.20552e-12	8.58759e-11
CEP95	17q23.3	-0.298373	4.32105e-12	8.81449e-11
GTPBP3	19p13.11	-0.298309	4.36924e-12	8.90371e-11
NASP	1p34.1	-0.298248	4.41525e-12	8.98831e-11
FANCA	16q24.3	-0.298101	4.52789e-12	9.19394e-11
GTF3C5	9q34.13	-0.298054	4.56463e-12	9.25472e-11
UBE2J2	1p36.33	-0.298019	4.59186e-12	9.28169e-11
ANAPC2	9q34.3	-0.297884	4.69973e-12	9.49013e-11
TAF4	20q13.33	-0.297878	4.70484e-12	9.49087e-11
ZNF205	16p13.3	-0.297839	4.73592e-12	9.54212e-11
PRR22	19p13.3	-0.297834	4.73979e-12	9.54212e-11
ZDHHC12	9q34.11	-0.29779	4.77566e-12	9.60466e-11
TRMT61A	14q32.33	-0.297597	4.9368e-12	9.90239e-11
RCOR2	11q13.1	-0.297589	4.94356e-12	9.90247e-11
DNASE1L2	16p13.3	-0.297442	5.06925e-12	1.01339e-10
CPSF4	7q22.1	-0.296838	5.62146e-12	1.11819e-10
MAP6D1	3q27.1	-0.296809	5.64952e-12	1.12266e-10
CYTH2	19q13.33	-0.296767	5.69023e-12	1.12851e-10
GFER	16p13.3	-0.296715	5.74092e-12	1.1369e-10
TIMELESS	12q13.3	-0.296699	5.75636e-12	1.13823e-10
CYBC1	17q25.3	-0.296593	5.86196e-12	1.15568e-10
POP7	7q22.1	-0.296515	5.94051e-12	1.16934e-10
MLF 2.00	12p13.31	-0.296507	5.94791e-12	1.16934e-10
SPAG5	17q11.2	-0.296407	6.05084e-12	1.18823e-10
VPS37C	11q12.2	-0.29628	6.18301e-12	1.21247e-10
PCGF3	4p16.3	-0.296195	6.27327e-12	1.2247e-10
TRAPPC14	7q22.1	-0.295915	6.58044e-12	1.27967e-10
DNAJC11	1p36.31	-0.295693	6.83323e-12	1.32496e-10
RPUSD1	16p13.3	-0.295655	6.87799e-12	1.33131e-10
MLST8	16p13.3	-0.295623	6.91476e-12	1.33688e-10
PLXNA3	Xq28	-0.29543	7.1463e-12	1.37897e-10
ULK3	15q24.1	-0.295417	7.16182e-12	1.38064e-10
SNHG17	20q11.23	-0.295184	7.45109e-12	1.43364e-10
HEXD	17q25.3	-0.295013	7.67055e-12	1.47303e-10
TBC1D7	6p24.1	-0.294933	7.77556e-12	1.49176e-10
WNK2	9q22.31	-0.294925	7.78573e-12	1.49228e-10
CNOT3	19q13.42	-0.294834	7.90592e-12	1.51386e-10
UBE2S	19q13.42	-0.294791	7.96456e-12	1.52363e-10
MSTO1	1q22	-0.294453	8.43426e-12	1.60733e-10
ZNF133	20p11.23	-0.294446	8.44344e-12	1.60755e-10
HROB	17q21.31	-0.294427	8.47129e-12	1.61132e-10
CLCN2	3q27.1	-0.294256	8.71973e-12	1.65542e-10
NUDT8	11q13.2	-0.294141	8.89147e-12	1.68643e-10
PIMREG	17p13.2	-0.293861	9.32145e-12	1.7613e-10
FN3K	17q25.3	-0.293691	9.59365e-12	1.81102e-10
SART1	11q13.1	-0.293615	9.71732e-12	1.83263e-10
MAGIX	Xp11.23	-0.293595	9.7507e-12	1.83719e-10
STX16	20q13.32	-0.293536	9.84703e-12	1.8536e-10
LONP1	19p13.2	-0.293436	1.00147e-11	1.88339e-10
SNHG10	14q32.13	-0.293369	1.01283e-11	1.90295e-10
SLC25A29	14q32.2	-0.293335	1.01874e-11	1.91227e-10
GMPPA	2q35	-0.293202	1.04184e-11	1.95379e-10
AURKAP1	1q41	-0.292923	1.09187e-11	2.04188e-10
WDR97	8q24.3	-0.292908	1.0946e-11	2.04507e-10
MROH1	8q24.3	-0.292689	1.13577e-11	2.11999e-10
SAC3D1	11q13.1	-0.292565	1.15967e-11	2.16259e-10
CDCA3	12p13.31	-0.29253	1.16656e-11	2.17341e-10
PSRC1	1p13.3	-0.292317	1.20898e-11	2.24617e-10
NPEPL1	20q13.32	-0.292304	1.21163e-11	2.249e-10
FKRP	19q13.32	-0.292287	1.21508e-11	2.25331e-10
SUV39H1	Xp11.23	-0.292266	1.21946e-11	2.25933e-10
DVL2	17p13.1	-0.292187	1.23565e-11	2.28722e-10
GTF2IRD1	7q11.23	-0.292097	1.25439e-11	2.31975e-10
GEMIN7	19q13.32	-0.292058	1.26267e-11	2.3329e-10
HSF4	16q22.1	-0.291745	1.33064e-11	2.45004e-10
PSMB4	1q21.3	-0.291686	1.34383e-11	2.46916e-10
CDC34	19p13.3	-0.291646	1.35297e-11	2.48367e-10
MAPK8IP3	16p13.3	-0.291576	1.36888e-11	2.51057e-10
GTPBP6	Xp22.33 and Yp11.32	-0.291367	1.41756e-11	2.59509e-10
DCUN1D2	13q34	-0.291241	1.44785e-11	2.6457e-10
CDK16	Xp11.3	-0.290986	1.51073e-11	2.75055e-10
COMMD5	8q24.3	-0.290933	1.52416e-11	2.77247e-10
KLC2	11q13.2	-0.290915	1.52896e-11	2.77868e-10
PAM16	16p13.3	-0.290722	1.57886e-11	2.86628e-10
FDX2	19p13.2	-0.290677	1.59074e-11	2.8831e-10
CIRBP-AS1	19p13.3	-0.290416	1.66148e-11	3.00005e-10
DSN1	20q11.23	-0.290174	1.72996e-11	3.11004e-10
C20ORF204	20q13.33	-0.289952	1.79487e-11	3.21805e-10
LINC00115	1p36.33	-0.289612	1.89928e-11	3.39611e-10
MYBL2	20q13.12	-0.289488	1.93883e-11	3.45447e-10
VAX2	2p13.3	-0.289422	1.96037e-11	3.48973e-10
PLA2G6	22q13.1	-0.289246	2.01846e-11	3.58357e-10
PTGES2-AS1	9q34.11	-0.289209	2.03069e-11	3.60209e-10
RUSC1-AS1	1q22	-0.288963	2.11523e-11	3.74209e-10
FANCL	2p16.1	-0.288754	2.18958e-11	3.85996e-10
ORC6	16q11.2	-0.288649	2.22822e-11	3.92461e-10
RCC1L	7q11.23	-0.288589	2.25021e-11	3.95985e-10
MUTYH	1p34.1	-0.288574	2.25596e-11	3.96299e-10
PROCA1	17q11.2	-0.288443	2.30546e-11	4.03222e-10
CENPM	22q13.2	-0.288438	2.30747e-11	4.03222e-10
PROZ	13q34	-0.288406	2.31969e-11	4.05004e-10
CASKIN1	16p13.3	-0.288349	2.34149e-11	4.07742e-10
GALE	1p36.11	-0.288009	2.47676e-11	4.30547e-10
EMC6	17p13.2	-0.287925	2.51114e-11	4.35766e-10
QRICH2	17q25.1	-0.287724	2.59601e-11	4.47772e-10
ZNF768	16p11.2	-0.287684	2.61307e-11	4.49938e-10
STK11IP	2q35	-0.287574	2.66115e-11	4.57037e-10
TRIM45	1p13.1	-0.287543	2.67459e-11	4.5895e-10
CNIH2	11q13.2	-0.287392	2.7419e-11	4.70097e-10
TOR2A	9q34.11	-0.287181	2.8389e-11	4.8631e-10
DOLPP1	9q34.11	-0.287145	2.85551e-11	4.88319e-10
GOLGA2P6	10p11.23	-0.286986	2.93113e-11	5.00394e-10
TMEM234	1p35.2	-0.286856	2.99487e-11	5.1084e-10
EZH2	7q36.1	-0.286848	2.99842e-11	5.1101e-10
TMEM86B	19q13.42	-0.286744	3.05023e-11	5.18955e-10
RAVER1	19p13.2	-0.286695	3.07482e-11	5.22694e-10
LIN7B	19q13.33	-0.286637	3.10438e-11	5.2727e-10
TRIM11	1q42.13	-0.286465	3.19323e-11	5.40982e-10
NT5M	17p11.2	-0.286444	3.20407e-11	5.42124e-10
AKAP17A	Xp22.33 and Yp11.32	-0.286365	3.24597e-11	5.48058e-10
METTL1	12q14.1	-0.286279	3.29209e-11	5.54909e-10
SLX4	16p13.3	-0.286134	3.37118e-11	5.67283e-10
FLRT1	11q13.1	-0.286054	3.41568e-11	5.73806e-10
ECI1	16p13.3	-0.285913	3.49543e-11	5.86218e-10
HJURP	2q37.1	-0.285756	3.58666e-11	6.0051e-10
UBE2O	17q25.1	-0.285693	3.62379e-11	6.06219e-10
POMT1	9q34.13	-0.285259	3.88992e-11	6.45876e-10
PSMD3	17q21.1	-0.285182	3.93898e-11	6.52936e-10
LSM 4.00	19p13.11	-0.285105	3.98937e-11	6.60195e-10
NOXA1	9q34.3	-0.284841	4.1647e-11	6.87502e-10
HMBS	11q23.3	-0.284611	4.3237e-11	7.12572e-10
BLOC1S4	4p16.1	-0.284288	4.5569e-11	7.4977e-10
CTRL	16q22.1	-0.284202	4.62147e-11	7.59144e-10
MCRIP1	17q25.3	-0.284107	4.69278e-11	7.70224e-10
TRIM46	1q22	-0.284068	4.72321e-11	7.74583e-10
SAP30BP	17q25.1	-0.283883	4.86693e-11	7.94893e-10
ARHGAP39	8q24.3	-0.283699	5.01415e-11	8.176e-10
DGKZ	11p11.2	-0.283669	5.03894e-11	8.20304e-10
YJEFN3	19p13.11	-0.283662	5.04439e-11	8.20524e-10
CHFR	12q24.33	-0.283592	5.10208e-11	8.29233e-10
HIP1R	12q24.31	-0.283395	5.26758e-11	8.53357e-10
CDK10	16q24.3	-0.283191	5.44484e-11	8.79222e-10
SLC52A2	8q24.3	-0.283127	5.50147e-11	8.87322e-10
WASH2P	2q14.1	-0.282924	5.68531e-11	9.15835e-10
ATXN7L3	17q21.31	-0.282788	5.81189e-11	9.34719e-10
CACFD1	9q34.2	-0.282619	5.97307e-11	9.59097e-10
MVD	16q24.2	-0.282601	5.98976e-11	9.61006e-10
CCDC22	Xp11.23	-0.282585	6.00525e-11	9.62718e-10
CHAF1A	19p13.3	-0.28258	6.01093e-11	9.62856e-10
TBC1D10B	16p11.2	-0.282549	6.04034e-11	9.66793e-10
INTS1	7p22.3	-0.282429	6.15903e-11	9.84213e-10
ATG101	12q13.13	-0.282413	6.17493e-11	9.85967e-10
C19ORF48	19q13.33	-0.282393	6.19522e-11	9.87628e-10
ACADVL	17p13.1	-0.282337	6.25131e-11	9.94983e-10
CCDC142	2p13.1	-0.282154	6.43876e-11	1.02238e-09
GTF2H4	6p21.33	-0.28209	6.505e-11	1.03044e-09
SDHAF1	19q13.12	-0.281978	6.62316e-11	1.04833e-09
NFATC4	14q12	-0.281945	6.65922e-11	1.0532e-09
PGGHG	11p15.5	-0.281886	6.72278e-11	1.06241e-09
SLC25A35	17p13.1	-0.281514	7.13777e-11	1.12267e-09
RFC2	7q11.23	-0.281471	7.18729e-11	1.12957e-09
SH3GLB2	9q34.11	-0.281447	7.21443e-11	1.13205e-09
D2HGDH	2q37.3	-0.281391	7.28011e-11	1.14146e-09
NR2F6	19p13.11	-0.281361	7.31506e-11	1.14515e-09
RCC2	1p36.13	-0.281082	7.65043e-11	1.19484e-09
ZNF598	16p13.3	-0.280926	7.84504e-11	1.22332e-09
NAA38	17p13.1	-0.2809	7.87758e-11	1.22744e-09
TMEM11	17p11.2	-0.280781	8.0297e-11	1.2492e-09
RUVBL2	19q13.33	-0.280739	8.08299e-11	1.25456e-09
DGCR8	22q11.21	-0.280685	8.15341e-11	1.26451e-09
GAL3ST2	2q37.3	-0.280448	8.46955e-11	1.31049e-09
SLC25A22	11p15.5	-0.280314	8.6535e-11	1.33585e-09
FBRSL1	12q24.33	-0.280307	8.66325e-11	1.33632e-09
SCYL1	11q13.1	-0.280253	8.73762e-11	1.34571e-09
PMPCA	9q34.3	-0.280125	8.91841e-11	1.37145e-09
MAP3K11	11q13.1	-0.280117	8.93044e-11	1.37224e-09
PUSL1	1p36.33	-0.280046	9.03272e-11	1.38583e-09
NTHL1	16p13.3	-0.279694	9.55468e-11	1.45919e-09
DENND4B	1q21.3	-0.27964	9.63765e-11	1.47073e-09
MYBPC3	11p11.2	-0.279511	9.83851e-11	1.49796e-09
AP1G2	14q11.2	-0.279456	9.92404e-11	1.50922e-09
ULK1	12q24.33	-0.279417	9.98637e-11	1.51585e-09
CHEK2	22q12.1	-0.279411	9.99606e-11	1.51617e-09
ESPL1	12q13.13	-0.279338	1.01127e-10	1.5327e-09
SIRT7	17q25.3	-0.279319	1.01437e-10	1.53624e-09
PFDN2	1q23.3	-0.279307	1.01633e-10	1.53803e-09
MBD3	19p13.3	-0.279262	1.02369e-10	1.548e-09
UBE2T	1q32.1	-0.27915	1.04215e-10	1.57473e-09
E2F2	1p36.12	-0.279096	1.05101e-10	1.58692e-09
DMAP1	1p34.1	-0.279063	1.05657e-10	1.5941e-09
DNAH14	1q42.12	-0.27904	1.06051e-10	1.59884e-09
HNRNPL	19q13.2	-0.279023	1.0634e-10	1.60199e-09
RABEP2	16p11.2	-0.278857	1.09184e-10	1.63989e-09
PAXX	9q34.3	-0.278825	1.09748e-10	1.64712e-09
FKBPL	6p21.32	-0.278627	1.1325e-10	1.69586e-09
RAD54L	1p34.1	-0.278455	1.16388e-10	1.74155e-09
THOC6	16p13.3	-0.278406	1.17301e-10	1.75391e-09
BAX	19q13.33	-0.278388	1.17638e-10	1.75763e-09
DOHH	19p13.3	-0.278369	1.17998e-10	1.76037e-09
GIT1	17q11.2	-0.278312	1.19062e-10	1.77492e-09
EIF4EBP1	8p11.23	-0.278262	1.20018e-10	1.78784e-09
ABCA7	19p13.3	-0.278202	1.2116e-10	1.8035e-09
FUS	16p11.2	-0.278182	1.21549e-10	1.80796e-09
NT5C3B	17q21.2	-0.277867	1.27767e-10	1.89199e-09
TSR2	Xp11.22	-0.277777	1.29614e-10	1.91738e-09
PLEKHJ1	19p13.3	-0.277766	1.29846e-10	1.91852e-09
CXXC1	18q21.1	-0.277541	1.3454e-10	1.98055e-09
ZSCAN16	6p22.1	-0.277421	1.3713e-10	2.01571e-09
POC1A	3p21.2	-0.277404	1.37509e-10	2.01979e-09
BCL3	19q13.32	-0.277253	1.40829e-10	2.06249e-09
KDF1	1p36.11	-0.277184	1.42374e-10	2.08041e-09
TBCB	19q13.12	-0.277179	1.42468e-10	2.08041e-09
GPR137	11q13.1	-0.277147	1.43209e-10	2.0897e-09
ARRDC1-AS1	9q34.3	-0.277003	1.46506e-10	2.13314e-09
SLC37A4	11q23.3	-0.276727	1.53014e-10	2.21981e-09
PRR14	16p11.2	-0.276701	1.53642e-10	2.2273e-09
NOC2L	1p36.33	-0.276597	1.56196e-10	2.26106e-09
SPINT2	19q13.2	-0.276581	1.56584e-10	2.26503e-09
EP400P1	12q24.33	-0.27617	1.67066e-10	2.41316e-09
IQGAP3	1q22	-0.2761	1.68908e-10	2.43625e-09
MAMDC4	9q34.3	-0.276038	1.70559e-10	2.45829e-09
DMPK	19q13.32	-0.275875	1.75001e-10	2.51324e-09
SNF8	17q21.32	-0.275812	1.76736e-10	2.53635e-09
C2CD4D	1q21.3	-0.275788	1.77408e-10	2.54416e-09
HOOK2	19p13.13	-0.275769	1.77947e-10	2.55001e-09
GAK	4p16.3	-0.275616	1.8228e-10	2.60655e-09
GEMIN8P4	1p22.2	-0.275472	1.8643e-10	2.66019e-09
QTRT1	19p13.3	-0.275331	1.90622e-10	2.71226e-09
SFI1	22q12.2	-0.275232	1.9359e-10	2.75057e-09
COX6A1	12q24.31	-0.275225	1.93793e-10	2.7515e-09
MYPOP	19q13.32	-0.2752	1.94575e-10	2.76065e-09
KCNMB3	3q26.32	-0.275125	1.9688e-10	2.79137e-09
DDX55	12q24.31	-0.274916	2.03413e-10	2.87991e-09
POLA2	11q13.1	-0.27482	2.0649e-10	2.91934e-09
FANCG	9p13.3	-0.274677	2.1117e-10	2.97737e-09
C17ORF100	17p13.1	-0.274658	2.11804e-10	2.98391e-09
HSPBP1	19q13.42	-0.274478	2.17848e-10	3.06258e-09
PRPF6	20q13.33	-0.27429	2.24353e-10	3.14961e-09
SMYD5	2p13.2	-0.274253	2.25648e-10	3.16557e-09
BRD9	5p15.33	-0.274239	2.26134e-10	3.17016e-09
PIN4	Xq13.1	-0.274149	2.29356e-10	3.20857e-09
HDAC6	Xp11.23	-0.274084	2.31693e-10	3.23674e-09
PRSS27	16p13.3	-0.27396	2.36208e-10	3.28832e-09
HPX	11p15.4	-0.273914	2.37895e-10	3.30464e-09
TCIRG1	11q13.2	-0.273906	2.38207e-10	3.30464e-09
SPAG4	20q11.22	-0.273886	2.38947e-10	3.31261e-09
YIF1B	19q13.2	-0.27368	2.46768e-10	3.41158e-09
NDOR1	9q34.3	-0.273383	2.58433e-10	3.55563e-09
SAFB	19p13.3	-0.273366	2.59108e-10	3.56026e-09
KLHL25	15q25.3	-0.273272	2.62928e-10	3.60754e-09
DONSON	21q22.11	-0.27307	2.71333e-10	3.71776e-09
KAT8	16p11.2	-0.273028	2.73107e-10	3.73695e-09
RELL2	5q31.3	-0.27285	2.80755e-10	3.83635e-09
RAB24	5q35.3	-0.272827	2.81749e-10	3.8473e-09
TRABD	22q13.33	-0.27282	2.8208e-10	3.84919e-09
GLYCTK	3p21.2	-0.272705	2.87172e-10	3.916e-09
KNOP1	16p12.3	-0.272665	2.88923e-10	3.93719e-09
EME2	16p13.3	-0.272654	2.8942e-10	3.94128e-09
CHKB-CPT1B	22q13.33	-0.272466	2.97995e-10	4.04978e-09
SPRN	10q26.3	-0.272414	3.00408e-10	4.07979e-09
LINC01089	12q24.31	-0.272352	3.03322e-10	4.11378e-09
CABLES2	20q13.33	-0.272343	3.03755e-10	4.11686e-09
IGSF9	1q23.2	-0.272149	3.12994e-10	4.2306e-09
ELF3	1q32.1	-0.272109	3.14966e-10	4.25438e-09
PASK	2q37.3	-0.271912	3.24697e-10	4.37401e-09
RNASEH2A	19p13.13	-0.27187	3.26817e-10	4.39727e-09
EXOC7	17q25.1	-0.271869	3.26864e-10	4.39727e-09
AFG3L1P	16q24.3	-0.271668	3.37202e-10	4.51508e-09
ZNHIT2	11q13.1	-0.271628	3.3929e-10	4.53999e-09
DDX51	12q24.33	-0.271516	3.45219e-10	4.61254e-09
MOSPD3	7q22.1	-0.271512	3.45404e-10	4.61254e-09
GIGYF1	7q22.1	-0.271377	3.52677e-10	4.70439e-09
SCAF1	19q13.3-q13.4	-0.271311	3.56331e-10	4.74895e-09
PRMT1	19q13.33	-0.271265	3.58857e-10	4.77624e-09
PSMC5	17q23.3	-0.271198	3.62583e-10	4.81941e-09
FBXL6	8q24.3	-0.271158	3.64819e-10	4.84539e-09
MRPL41	9q34.3	-0.271153	3.65122e-10	4.84539e-09
PDAP1	7q22.1	-0.271134	3.66195e-10	4.85451e-09
PHRF1	11p15.5	-0.271103	3.67945e-10	4.87448e-09
MUS81	11q13	-0.271054	3.70699e-10	4.90447e-09
FAM193B	5q35.3	-0.270994	3.74139e-10	4.94344e-09
DHCR7	11q13.4	-0.270897	3.79774e-10	5.00796e-09
GTSE1	22q13.31	-0.270875	3.81077e-10	5.02182e-09
TUT1	11q12.3	-0.270726	3.89919e-10	5.12821e-09
CBFA2T2	20q11.21-q11.22	-0.27056	4.00033e-10	5.24054e-09
CACTIN	19p13.3	-0.270497	4.03922e-10	5.28801e-09
FGF17	8p21.3	-0.270274	4.18011e-10	5.46531e-09
INTS11	1p36.33	-0.270075	4.31001e-10	5.62779e-09
C6ORF136	6p21.33	-0.270069	4.31351e-10	5.62869e-09
TSACC	1q22	-0.270054	4.324e-10	5.63869e-09
TRPT1	11q13.1	-0.27004	4.33312e-10	5.64689e-09
DNLZ	9q34.3	-0.269778	4.51105e-10	5.85208e-09
ASF1B	19p13.12	-0.269712	4.55694e-10	5.90777e-09
TMEM175	4p16.3	-0.269694	4.56903e-10	5.9196e-09
STX1A	7q11.23	-0.269487	4.71638e-10	6.1026e-09
SETD1A	16p11.2	-0.269237	4.90035e-10	6.32427e-09
GINS1	20p11.21	-0.269131	4.98049e-10	6.42355e-09
GBAP1	1q22	-0.269083	5.01741e-10	6.46699e-09
CD2BP2	16p11.2	-0.269038	5.05231e-10	6.50778e-09
KRBA1	7q36.1	-0.269029	5.05881e-10	6.51196e-09
PRELID3A	18p11.21	-0.26901	5.07344e-10	6.52658e-09
SH2D6	2p11.2	-0.268999	5.08223e-10	6.53369e-09
PEDS1	20q13.13	-0.268739	5.28821e-10	6.78541e-09
CCNE1	19q12	-0.268649	5.36149e-10	6.87061e-09
CENATAC	11q23.3	-0.268633	5.37466e-10	6.88308e-09
MIF	22q11.23	-0.268562	5.4331e-10	6.95031e-09
SPSB3	16p13.3	-0.268561	5.43411e-10	6.95031e-09
MIB2	1p36.33	-0.268469	5.5109e-10	7.03502e-09
STARD3	17q11-q12	-0.268457	5.52091e-10	7.0433e-09
PAX9	14q13.3	-0.268337	5.62321e-10	7.1601e-09
SLC26A1	4p16.3	-0.268193	5.74714e-10	7.30859e-09
STRC	15q15.3	-0.268188	5.75163e-10	7.30965e-09
RNF186	1p36.13	-0.268158	5.77864e-10	7.33465e-09
EPS8L2	11p15.5	-0.268088	5.84053e-10	7.39912e-09
ATXN2L	16p11.2	-0.267997	5.92204e-10	7.49762e-09
PPCDC	15q24.2	-0.267703	6.1923e-10	7.81998e-09
RRP7BP	22q13.2	-0.267694	6.2016e-10	7.82677e-09
COPE	19p13.11	-0.267491	6.39553e-10	8.05028e-09
SPHK2	19q13.33	-0.267488	6.39883e-10	8.05028e-09
CHAF1B	21q22.12-q22.13	-0.267458	6.42776e-10	8.07389e-09
MRPL20-AS1	1p36.33	-0.267456	6.42971e-10	8.07389e-09
NUDT14	14q32.33	-0.267276	6.60738e-10	8.28658e-09
C8ORF82	8q24.3	-0.267263	6.6208e-10	8.29821e-09
NADSYN1	11q13.4	-0.267185	6.69962e-10	8.38649e-09
CCNP	19q13.2	-0.266983	6.90856e-10	8.63182e-09
SWSAP1	19p13.2	-0.26686	7.0385e-10	8.78868e-09
FLYWCH2	16p13.3	-0.266533	7.39485e-10	9.20489e-09
KDM5C	Xp11.22	-0.266503	7.42894e-10	9.24156e-09
FEN1	11q12.2	-0.266488	7.44536e-10	9.25623e-09
SYNGR4	19q13.33	-0.266436	7.50477e-10	9.32429e-09
TBKBP1	17q21.32	-0.266411	7.53282e-10	9.35333e-09
NOP2	12p13.31	-0.265908	8.12803e-10	1.00115e-08
NIT1	1q23.3	-0.265899	8.13933e-10	1.00193e-08
DYNLT2	6q27	-0.265668	8.42807e-10	1.03492e-08
IDH3G	Xq28	-0.265663	8.43403e-10	1.03502e-08
CDT1	16q24.3	-0.265656	8.44286e-10	1.03547e-08
ALKBH4	7q22.1	-0.265563	8.56242e-10	1.04564e-08
ARHGEF16	1p36.32	-0.265517	8.62202e-10	1.05035e-08
TICRR	15q26.1	-0.265471	8.68133e-10	1.05693e-08
HGFAC	4p16.3	-0.265432	8.73249e-10	1.06252e-08
ZNF821	16q22.2	-0.265403	8.77099e-10	1.06655e-08
MRPS34	16p13.3	-0.265376	8.80623e-10	1.06979e-08
ENGASE	17q25.3	-0.265358	8.83034e-10	1.07181e-08
ENTPD8	9q34.3	-0.265332	8.86522e-10	1.07539e-08
SIVA1	14q32.33	-0.265153	9.10723e-10	1.10341e-08
TACO1	17q23.3	-0.265122	9.14957e-10	1.1072e-08
KHDC4	1q22	-0.265059	9.23675e-10	1.11707e-08
GALK1	17q25.1	-0.264846	9.53834e-10	1.15007e-08
MYO15B	17q25.1	-0.264757	9.66638e-10	1.1648e-08
ASB16-AS1	17q21.31	-0.26459	9.91107e-10	1.19285e-08
ZNF786	7q36.1	-0.264551	9.96937e-10	1.19842e-08
FARSA	19p13.13	-0.264319	1.03236e-09	1.23877e-08
MYH7B	20q11.22	-0.264286	1.03735e-09	1.24327e-08
NPIPB3	16p12.2	-0.264252	1.04275e-09	1.24824e-08
ZMIZ2	7p13	-0.264201	1.0507e-09	1.25626e-08
TMEM186	16p13.2	-0.264101	1.0666e-09	1.2745e-08
NMRAL1	16p13.3	-0.26392	1.09586e-09	1.30712e-08
MRPS21	1q21.2	-0.263811	1.11391e-09	1.32658e-08
ESS2	22q11.21	-0.26381	1.11408e-09	1.32658e-08
ICA1	7p21.3	-0.263722	1.12881e-09	1.34242e-08
ZGRF1	4q25	-0.263565	1.15566e-09	1.37271e-08
GPKOW	Xp11.23	-0.263532	1.16137e-09	1.37805e-08
LCN12	9q34.3	-0.263515	1.16436e-09	1.379e-08
PSENEN	19q13.12	-0.263515	1.1644e-09	1.379e-08
CBARP	19p13.3	-0.263501	1.16681e-09	1.38104e-08
GADD45GIP1	19p13.13	-0.26342	1.18098e-09	1.39616e-08
SDHAP1	3q29	-0.26336	1.19166e-09	1.40795e-08
HSPE1	2q33.1	-0.263266	1.20841e-09	1.42521e-08
RMI2	16p13.13	-0.263231	1.21483e-09	1.43194e-08
SRPK3	Xq28	-0.263105	1.23774e-09	1.45551e-08
HAUS7	Xq28	-0.263072	1.24395e-09	1.46059e-08
KMT2B	19q13.12	-0.26307	1.24425e-09	1.46059e-08
TFPT	19q13.42	-0.262939	1.26882e-09	1.48769e-08
CLUH	17p13.3	-0.262787	1.29789e-09	1.51998e-08
USP35	11q14.1	-0.262689	1.3171e-09	1.54068e-08
GDF9	5q31.1	-0.262671	1.32053e-09	1.54379e-08
CNP	17q21.2	-0.26265	1.32458e-09	1.54762e-08
CCNL2	1p36.33	-0.262642	1.32623e-09	1.54864e-08
CORT	1p36.22	-0.262113	1.43482e-09	1.66764e-08
IKBKG	Xq28	-0.262106	1.43633e-09	1.66843e-08
SCNN1D	1p36.33	-0.262038	1.45091e-09	1.68439e-08
HMG20B	19p13.3	-0.261899	1.48114e-09	1.71848e-08
PRR5-ARHGAP8	22q13.31	-0.261798	1.50351e-09	1.74242e-08
ABHD16B	20q13.33	-0.261784	1.50674e-09	1.74401e-08
SPATA25	20q13.12	-0.261773	1.50917e-09	1.74493e-08
CROCCP2	1p36.13	-0.261754	1.51326e-09	1.74865e-08
MAEA	4p16.3	-0.261724	1.52014e-09	1.75355e-08
DIPK1B	9q34.3	-0.261632	1.54101e-09	1.77558e-08
COX8A	11q13.1	-0.261532	1.56399e-09	1.79792e-08
FAM3A	Xq28	-0.261487	1.57452e-09	1.80897e-08
FOXK2	17q25.3	-0.261441	1.58521e-09	1.82021e-08
PPFIA3	19q13.33	-0.261391	1.59698e-09	1.83129e-08
INPPL1	11q13.4	-0.261387	1.59809e-09	1.83129e-08
RAP1GAP2	17p13.3	-0.261385	1.59852e-09	1.83129e-08
MIOX	22q13.33	-0.261238	1.63369e-09	1.86944e-08
KNTC1	12q24.31	-0.261231	1.63538e-09	1.8703e-08
BBLN	9q34.11	-0.261214	1.63944e-09	1.8728e-08
CTU2	16q24.3	-0.261187	1.64592e-09	1.87699e-08
RTL8A	Xq26.3	-0.261144	1.65645e-09	1.88791e-08
ZNF414	19p13.2	-0.26114	1.6574e-09	1.88793e-08
MIEN1	17q12	-0.261002	1.69178e-09	1.9227e-08
EHMT2	6p21.33	-0.260992	1.6941e-09	1.92425e-08
TRAF2	9q34.3	-0.260945	1.70602e-09	1.93669e-08
CAMSAP3	19p13.2	-0.260856	1.72857e-09	1.95895e-08
DCST2	1q21.3	-0.260838	1.73313e-09	1.96189e-08
PNN	14q21.1	-0.260789	1.74576e-09	1.97471e-08
C1ORF122	1p34.3	-0.260769	1.75096e-09	1.97872e-08
SNRPC	6p21.31	-0.26065	1.78186e-09	2.01136e-08
CSTF3	11p13	-0.260642	1.78399e-09	2.01263e-08
RFC4	3q27.3	-0.260586	1.79903e-09	2.02731e-08
CTBP1	4p16.3	-0.260528	1.81436e-09	2.04228e-08
KAAG1	6p22.3	-0.26019	1.90722e-09	2.13838e-08
CHERP	19p13.11	-0.260144	1.92012e-09	2.15043e-08
VPS72	1q21.3	-0.259826	2.01227e-09	2.24358e-08
ALG3	3q27.1	-0.259709	2.04699e-09	2.27847e-08
MRM1	17q12	-0.259506	2.10904e-09	2.34232e-08
MRPL52	14q11.2	-0.259497	2.11181e-09	2.3441e-08
DHRS11	17q12	-0.259446	2.1278e-09	2.35791e-08
COQ8B	19q13.2	-0.259369	2.15195e-09	2.38072e-08
MDK	11p11.2	-0.259261	2.18647e-09	2.41357e-08
TMEM132A	11q12.2	-0.25916	2.21901e-09	2.44409e-08
FAM110A	20p13	-0.258623	2.40057e-09	2.63189e-08
JUP	17q21.2	-0.258621	2.40137e-09	2.63189e-08
HPN-AS1	19q13.11-q13.12	-0.258599	2.4093e-09	2.63914e-08
MILIP	17q25.3	-0.258282	2.52367e-09	2.75385e-08
ZNF444	19q13.43	-0.257995	2.63167e-09	2.8639e-08
CEP72	5p15.33	-0.257917	2.6617e-09	2.89342e-08
SH2B1	16p11.2	-0.257802	2.7066e-09	2.93904e-08
MEX3A	1q22	-0.257628	2.77621e-09	3.00972e-08
LINC01226	1p35.2	-0.257556	2.80559e-09	3.03663e-08
OSBPL2	20q13.33	-0.257482	2.83613e-09	3.06802e-08
ARFRP1	20q13.33	-0.257473	2.83979e-09	3.07032e-08
C21ORF58	21q22.3	-0.257436	2.85517e-09	3.08528e-08
RING1	6p21.32	-0.25736	2.88705e-09	3.11805e-08
GSDMD	8q24.3	-0.257294	2.91497e-09	3.1465e-08
EPN3	17q21.33	-0.257265	2.92697e-09	3.15774e-08
ASB6	9q34.11	-0.257254	2.93174e-09	3.16119e-08
CLCN7	16p13.3	-0.257233	2.94091e-09	3.16766e-08
PYCR1	17q25.3	-0.257202	2.95399e-09	3.18003e-08
UBE2C	20q13.12	-0.256911	3.08175e-09	3.30521e-08
PI4KAP1	22q11.21	-0.256873	3.09879e-09	3.3216e-08
ENO3	17p13.2	-0.256788	3.13749e-09	3.35588e-08
APRG1	3p22.2	-0.256776	3.14273e-09	3.35848e-08
CDC25C	5q31.2	-0.256775	3.14327e-09	3.35848e-08
TUBB8	10p15.3	-0.256768	3.14658e-09	3.35954e-08
MAPK7	17p11.2	-0.256762	3.1493e-09	3.35954e-08
GINS2	16q24.1	-0.256721	3.16822e-09	3.37792e-08
C7ORF50	7p22.3	-0.256662	3.19539e-09	3.40144e-08
WBP1	2p13.1	-0.256614	3.2178e-09	3.42348e-08
ZSCAN9	6p22.1	-0.256475	3.28343e-09	3.48772e-08
RHBG	1q22	-0.256247	3.39373e-09	3.59577e-08
YTHDF1	20q13.33	-0.256246	3.39414e-09	3.59577e-08
BORCS8	19p13.11	-0.256177	3.42835e-09	3.6301e-08
TCAP	17q12	-0.256134	3.44944e-09	3.65049e-08
PGAP6	16p13.3	-0.256122	3.45568e-09	3.65364e-08
SNRPA1	15q26.3	-0.25611	3.46155e-09	3.6575e-08
MAZ	16p11.2	-0.256031	3.50127e-09	3.69751e-08
CORO1B	11q13.2	-0.25602	3.50686e-09	3.70146e-08
LSR	19q13.12	-0.255965	3.53519e-09	3.72546e-08
ARF5	7q32.1	-0.255832	3.60374e-09	3.7957e-08
GSK3A	19q13.2	-0.255765	3.63868e-09	3.82846e-08
KCNAB3	17p13.1	-0.255741	3.65133e-09	3.83975e-08
LMBR1L	12q13.12	-0.255704	3.6709e-09	3.85627e-08
NOP56	20p13	-0.255697	3.67463e-09	3.85817e-08
METTL3	14q11.2	-0.255565	3.7457e-09	3.92867e-08
RDM1	17q12	-0.255551	3.75334e-09	3.93461e-08
MFSD6L	17p13.1	-0.255539	3.76002e-09	3.93955e-08
GATD1	11p15.5	-0.255534	3.76233e-09	3.93991e-08
TMEM53	1p34.1	-0.255448	3.8094e-09	3.98086e-08
UFSP1	7q22.1	-0.255433	3.81801e-09	3.98777e-08
BIRC5	17q25.3	-0.255381	3.84637e-09	4.01529e-08
CAPN15	16p13.3	-0.255208	3.94382e-09	4.11273e-08
CDC20	1p34.2	-0.255124	3.99187e-09	4.16066e-08
BICRA	19q13.33	-0.255098	4.00667e-09	4.17391e-08
GPR37L1	1q32.1	-0.255013	4.05635e-09	4.22347e-08
BCL7C	16p11.2	-0.254946	4.09585e-09	4.26237e-08
FAM156A	Xp11.22	-0.254881	4.13442e-09	4.29803e-08
CISD3	17q12	-0.254867	4.14271e-09	4.30441e-08
CPSF1	8q24.3	-0.254595	4.30812e-09	4.46468e-08
CCDC12	3p21.31	-0.254487	4.37529e-09	4.52959e-08
SNRNP35	12q24.31	-0.25448	4.37994e-09	4.53206e-08
PUF60	8q24.3	-0.254357	4.45803e-09	4.60809e-08
DNAH17	17q25.3	-0.254241	4.53294e-09	4.6831e-08
NAA10	Xq28	-0.254237	4.53543e-09	4.68323e-08
H3C2	6p22.2	-0.253765	4.85374e-09	4.99645e-08
ZSCAN21	7q22.1	-0.253581	4.98311e-09	5.12699e-08
PTRH2	17q23.1	-0.253369	5.1374e-09	5.27216e-08
NPFF	12q13.13	-0.253306	5.18352e-09	5.31404e-08
PLEKHG5	1p36.31	-0.25329	5.19549e-09	5.32358e-08
NDUFB7	19p13.12	-0.253254	5.22242e-09	5.3457e-08
R3HDM4	19p13.3	-0.253142	5.30706e-09	5.424e-08
SRM	1p36.22	-0.253106	5.33422e-09	5.44897e-08
CCDC14	3q21.1	-0.25307	5.36185e-09	5.4716e-08
MTFR2	6q23.3	-0.253039	5.38506e-09	5.49249e-08
PSMD4	1q21.3	-0.253017	5.40261e-09	5.50723e-08
SYMPK	19q13.32	-0.252981	5.43044e-09	5.53031e-08
STPG3	9q34.3	-0.252911	5.48482e-09	5.57717e-08
DDAH2	6p21.33	-0.252889	5.50249e-09	5.59228e-08
CLDN4	7q11.23	-0.25275	5.61222e-09	5.68646e-08
FMC1	7q34	-0.252611	5.72521e-09	5.79801e-08
UBALD1	16p13.3	-0.252544	5.77967e-09	5.8502e-08
PGAM2	7p13	-0.252393	5.90604e-09	5.96603e-08
ARHGAP8	22q13.31	-0.252375	5.92073e-09	5.97784e-08
DUSP8	11p15.5	-0.25231	5.97606e-09	6.02458e-08
ARL6IP4	12q24.31	-0.252296	5.98772e-09	6.03329e-08
THAP4	2q37.3	-0.252242	6.03384e-09	6.0767e-08
SPNS1	16p11.2	-0.252188	6.0809e-09	6.12101e-08
BRI3BP	12q24.31	-0.252144	6.1193e-09	6.15657e-08
UBE2M	19q13.43	-0.252038	6.21247e-09	6.24402e-08
C2ORF68	2p11.2	-0.251862	6.36942e-09	6.38571e-08
CEP89	19q13.11	-0.251736	6.48458e-09	6.48815e-08
POR	7q11.23	-0.251654	6.56091e-09	6.55432e-08
MED27	9q34.13	-0.251651	6.56383e-09	6.55432e-08
TIMM13	19p13.3	-0.251603	6.60845e-09	6.59229e-08
PRSS45P	3p21.31	-0.251359	6.84135e-09	6.80763e-08
H1-10	3q21.3	-0.251289	6.9102e-09	6.87273e-08
SDHAP2	3q29	-0.25119	7.00759e-09	6.95478e-08
PPP5C	19q13.32	-0.251142	7.05513e-09	6.99597e-08
USP36	17q25.3	-0.251139	7.05861e-09	6.99597e-08
ADAMTS13	9q34.2	-0.25105	7.14772e-09	7.07376e-08
SUGP1	19p13.11	-0.250725	7.48526e-09	7.38587e-08
REPIN1	7q36.1	-0.250549	7.67347e-09	7.55667e-08
ZNF195	11p15.5	-0.250514	7.71221e-09	7.58735e-08
PHB1	17q21.33	-0.250468	7.7621e-09	7.63266e-08
ATP5MC1	17q21.32	-0.250448	7.78424e-09	7.65067e-08
KCTD13	16p11.2	-0.250435	7.79849e-09	7.66092e-08
BDH1	3q29	-0.250394	7.844e-09	7.69806e-08
AURKA	20q13.2	-0.250336	7.90819e-09	7.74869e-08
FBXO41	2p13.2	-0.250334	7.9111e-09	7.74869e-08
FZR1	19p13.3	-0.250328	7.91693e-09	7.7506e-08
C17ORF58	17q24.2	-0.250297	7.95237e-09	7.77388e-08
PREB	2p23.3	-0.250269	7.98316e-09	7.80017e-08
POLG2	17q23.3	-0.250171	8.09458e-09	7.89745e-08
UQCC4	16p13.3	-0.250113	8.16146e-09	7.9582e-08
PLEKHH3	17q21.2	-0.249939	8.36469e-09	8.14905e-08
LAMA5	20q13.33	-0.249916	8.392e-09	8.16372e-08
HES4	1p36.33	-0.249905	8.40475e-09	8.17215e-08
C17ORF75	17q11.2	-0.249847	8.4739e-09	8.23138e-08
DIABLO	12q24.31	-0.249793	8.53775e-09	8.28534e-08
DECR2	16p13.3	-0.249786	8.54695e-09	8.29025e-08
DRG2	17p11.2	-0.249767	8.56958e-09	8.30817e-08
ZNF574	19q13.2	-0.24976	8.57777e-09	8.31208e-08
TFAP2D	6p12.3	-0.2497	8.65156e-09	8.37546e-08
WDR18	19p13.3	-0.24954	8.84767e-09	8.56117e-08
NUDT1	7p22.3	-0.249504	8.89323e-09	8.60109e-08
RANBP1	22q11.21	-0.249483	8.91926e-09	8.61793e-08
PAQR4	16p13.3	-0.249459	8.95007e-09	8.64351e-08
CCDC9	19q13.32	-0.249436	8.97845e-09	8.66034e-08
UBXN11	1p36.11	-0.249431	8.98482e-09	8.66034e-08
MFSD10	4p16.3	-0.24931	9.13964e-09	8.79685e-08
SGSM2	17p13.3	-0.249157	9.33778e-09	8.97787e-08
DUSP28	2q37.3	-0.249155	9.34119e-09	8.97787e-08
ZNF787	19q13.43	-0.249127	9.37822e-09	9.00913e-08
PCYT2	17q25.3	-0.249121	9.38544e-09	9.01173e-08
FAM174C	19p13.3	-0.249007	9.53682e-09	9.1483e-08
ACAP3	1p36.33	-0.248876	9.71387e-09	9.30029e-08
SELENOO	22q13.33	-0.248842	9.76101e-09	9.34095e-08
FIZ1	19q13.42	-0.248818	9.79403e-09	9.36806e-08
SAFB2	19p13.3	-0.248751	9.88627e-09	9.45177e-08
RUSC1	1q22	-0.248718	9.93155e-09	9.49052e-08
TESK1	9p13.3	-0.248646	1.00323e-08	9.5776e-08
INTS3	1q21.3	-0.248577	1.01312e-08	9.66287e-08
URAHP	16q24.3	-0.248513	1.02216e-08	9.74438e-08
SLC25A1	22q11.21	-0.248503	1.0236e-08	9.75135e-08
KDM6B	17p13.1	-0.248409	1.03714e-08	9.86834e-08
ANKRD39	2q11.2	-0.248394	1.03937e-08	9.88492e-08
LENG8	19q13.42	-0.248325	1.04949e-08	9.97163e-08
BBC3	19q13.32	-0.248207	1.06698e-08	1.01282e-07
DCAF15	19p13.12	-0.248096	1.08369e-08	1.02721e-07
IFT43	14q24.3	-0.247999	1.09845e-08	1.04072e-07
ANKZF1	2q35	-0.24796	1.10452e-08	1.04498e-07
GRTP1	13q34	-0.24788	1.11687e-08	1.05567e-07
MTLN	2q13	-0.247863	1.11953e-08	1.05739e-07
CSNK1G2	19p13.3	-0.247652	1.15303e-08	1.08778e-07
VPS25	17q21.31	-0.247644	1.15433e-08	1.0885e-07
NME1	17q21.33	-0.247634	1.15592e-08	1.08949e-07
KRI1	19p13.2	-0.247618	1.15855e-08	1.09145e-07
GPCPD1	20p12.3	-0.24741	1.19271e-08	1.12152e-07
EXOSC4	8q24.3	-0.247371	1.19926e-08	1.12715e-07
TK1	17q25.3	-0.247313	1.20894e-08	1.13571e-07
HDHD3	9q32	-0.247275	1.21542e-08	1.14072e-07
EBP	Xp11.23	-0.247244	1.2207e-08	1.14514e-07
LZTS3	20p13	-0.247231	1.22293e-08	1.1467e-07
PPP1R10	6p21.33	-0.247077	1.24943e-08	1.16857e-07
ZNHIT1	7q22.1	-0.247019	1.25945e-08	1.17547e-07
ODF2	9q34.11	-0.246932	1.2749e-08	1.18873e-07
CLDN7	17p13.1	-0.24688	1.28409e-08	1.19619e-07
VCX3A	Xp22.31	-0.246596	1.33593e-08	1.23986e-07
PPFIA4	1q32.1	-0.246502	1.35343e-08	1.25552e-07
DLL3	19q13.2	-0.246434	1.36635e-08	1.26692e-07
DHX35	20q11.23-q12	-0.246429	1.36728e-08	1.26719e-07
NUDC	1p36.11	-0.246405	1.37181e-08	1.2708e-07
MRPL2	6p21.1	-0.246366	1.37928e-08	1.27713e-07
NOSIP	19q13.33	-0.246295	1.39299e-08	1.28922e-07
ZNF775	7q36.1	-0.246231	1.40546e-08	1.29973e-07
MYBBP1A	17p13.2	-0.246209	1.4097e-08	1.30228e-07
REX1BD	19p13.11	-0.246201	1.41126e-08	1.30312e-07
SLC26A6	3p21.31	-0.246174	1.41663e-08	1.30687e-07
SCARNA12	12p13.31	-0.24602	1.44714e-08	1.33379e-07
PLK1	16p12.2	-0.245887	1.47416e-08	1.35744e-07
POLR2J4	7p13	-0.245857	1.48024e-08	1.36216e-07
DDX56	7p13	-0.245855	1.48065e-08	1.36216e-07
C8G	9q34.3	-0.245847	1.48227e-08	1.36302e-07
SENP3	17p13	-0.245787	1.49476e-08	1.37387e-07
SPATA2	20q13.13	-0.245506	1.55404e-08	1.42573e-07
TIGD1	2q37.1	-0.245442	1.5679e-08	1.43581e-07
AFDN-DT	6q27	-0.245438	1.56865e-08	1.43585e-07
SELENOH	11q12.1	-0.245193	1.62264e-08	1.48255e-07
TIMM10	11q12.1	-0.245126	1.63774e-08	1.4943e-07
GDI1	Xq28	-0.245121	1.639e-08	1.49476e-07
SUPT7L	2p23.3	-0.24511	1.64148e-08	1.49634e-07
DNHD1	11p15.4	-0.24509	1.64601e-08	1.49979e-07
KLHL31	6p12.1	-0.245064	1.65179e-08	1.50437e-07
MTA3	2p21	-0.244926	1.68364e-08	1.53198e-07
CLK3	15q24.1	-0.244867	1.69734e-08	1.54304e-07
HPDL	1p34.1	-0.244839	1.70404e-08	1.54843e-07
ARRDC1	9q34.3	-0.244754	1.7241e-08	1.56453e-07
SCLY	2q37.3	-0.244749	1.72539e-08	1.56498e-07
PPP1R14B	11q13.1	-0.244697	1.73781e-08	1.57482e-07
SAPCD2	9q34.3	-0.244687	1.74001e-08	1.5761e-07
GCDH	19p13.13	-0.244658	1.74713e-08	1.58112e-07
SCX	8q24.3	-0.244596	1.76214e-08	1.59254e-07
TMC6	17q25.3	-0.244415	1.80671e-08	1.62871e-07
TCF3	19p13.3	-0.244413	1.80706e-08	1.62871e-07
PDXDC2P	16q22.1	-0.244407	1.80861e-08	1.62938e-07
MCF2L	13q34	-0.244362	1.81981e-08	1.63873e-07
PPP1R12C	19q13.42	-0.244311	1.83275e-08	1.64964e-07
DRAP1	11q13.1	-0.244238	1.85125e-08	1.66479e-07
CIDECP1	3p25.3	-0.244232	1.85258e-08	1.66524e-07
HAUS8	19p13.11	-0.244176	1.86693e-08	1.67663e-07
NXT1	20p11.21	-0.244064	1.89595e-08	1.70116e-07
COX6B1	19q13.12	-0.243825	1.95935e-08	1.75647e-07
PARP10	8q24.3	-0.243813	1.96262e-08	1.75862e-07
APBB3	5q31.3	-0.24369	1.99605e-08	1.78617e-07
EOLA2-DT	Xq28	-0.243639	2.00997e-08	1.79782e-07
ZNF428	19q13.31	-0.243632	2.01186e-08	1.79871e-07
P3H4	17q21.2	-0.24361	2.01799e-08	1.80338e-07
SPACA4	19q13.33	-0.243519	2.04333e-08	1.82439e-07
SSNA1	9q34.3	-0.243472	2.05653e-08	1.83454e-07
ZNF576	19q13.31	-0.243399	2.07733e-08	1.85144e-07
TPCN2	11q13.3	-0.243362	2.08792e-08	1.86005e-07
BANP	16q24.2	-0.243301	2.10529e-08	1.87469e-07
NDUFB10	16p13.3	-0.243263	2.11637e-08	1.88288e-07
CC2D1B	1p32.3	-0.243145	2.15083e-08	1.91099e-07
LINC01341	1q44	-0.243033	2.18405e-08	1.93878e-07
ZNF436-AS1	1p36.12	-0.242951	2.20867e-08	1.9589e-07
SOHLH1	9q34.3	-0.242922	2.21758e-08	1.96593e-07
HINFP	11q23.3	-0.242891	2.22712e-08	1.97347e-07
PIAS4	19p13.3	-0.242887	2.22806e-08	1.97347e-07
RHPN1-AS1	8q24.3	-0.24273	2.27649e-08	2.01013e-07
CDCA8	1p34.3	-0.242657	2.29943e-08	2.0286e-07
KLHL22	22q11.21	-0.242565	2.3284e-08	2.05234e-07
SNRPF	12q23.1	-0.242283	2.41979e-08	2.12539e-07
NRL	14q11.2-q12	-0.242255	2.42909e-08	2.13263e-07
MRPS12	19q13.2	-0.242185	2.45251e-08	2.15225e-07
RBM4	11q13.2	-0.242161	2.46031e-08	2.15814e-07
L3MBTL1	20q13.12	-0.242125	2.4726e-08	2.16797e-07
POLDIP2	17q11.2	-0.242106	2.47911e-08	2.17273e-07
ATPAF2	17p11.2	-0.242098	2.4817e-08	2.17273e-07
SOX2	3q26.33	-0.242097	2.48199e-08	2.17273e-07
SMARCD2	17q23.3	-0.242096	2.48237e-08	2.17273e-07
FADS2	11q12.2	-0.242045	2.49956e-08	2.18586e-07
UHRF1	19p13.3	-0.242041	2.50092e-08	2.18609e-07
DPP3	11q13.2	-0.242028	2.50543e-08	2.18907e-07
AHSA2P	2p15	-0.24198	2.52185e-08	2.2015e-07
NDUFS7	19p13.3	-0.241957	2.52989e-08	2.20755e-07
SLC19A1	21q22.3	-0.241909	2.54658e-08	2.22018e-07
TUBB4B	9q34.3	-0.241833	2.5728e-08	2.24011e-07
ATP2A3	17p13.2	-0.241702	2.6192e-08	2.27853e-07
SF3A2	19p13.3	-0.241682	2.62636e-08	2.28376e-07
DDX49	19p13.11	-0.241672	2.63009e-08	2.28601e-07
RNF208	9q34.3	-0.241576	2.66462e-08	2.313e-07
ATP5MF	7q22.1	-0.241564	2.66875e-08	2.31551e-07
BOLA1	1q21.2	-0.241561	2.66983e-08	2.31551e-07
NCBP2AS2	3q29	-0.24152	2.68477e-08	2.32646e-07
TMEM104	17q25.1	-0.241115	2.83675e-08	2.44966e-07
ZNF771	16p11.2	-0.241111	2.83851e-08	2.45011e-07
SEPTIN12	16p13.3	-0.241098	2.84325e-08	2.4524e-07
EOLA1-DT	Xq28	-0.241088	2.84727e-08	2.4545e-07
UCP3	11q13.4	-0.241054	2.86023e-08	2.46388e-07
ANO7	2q37.3	-0.241053	2.86062e-08	2.46388e-07
NUDT22	11q13.1	-0.241002	2.88048e-08	2.47778e-07
FBXW9	19p13.13	-0.240995	2.8832e-08	2.47799e-07
POLQ	3q13.33	-0.240905	2.91867e-08	2.50309e-07
CENPU	4q35.1	-0.240894	2.92331e-08	2.506e-07
C1ORF112	1q24.2	-0.240843	2.94348e-08	2.52221e-07
LINC00174	7q11.21	-0.240721	2.99235e-08	2.56189e-07
ILF3	19p13.2	-0.240684	3.00735e-08	2.57253e-07
GOLGA2P5	12q23.1	-0.240672	3.01249e-08	2.57582e-07
CRABP1	15q25.1	-0.240642	3.02479e-08	2.58302e-07
AUNIP	1p36.11	-0.240492	3.08694e-08	2.63385e-07
WDR74	11q12.3	-0.240444	3.10694e-08	2.64978e-07
LARGE2	11p11.2	-0.240289	3.1727e-08	2.70125e-07
APOO	Xp22.11	-0.240039	3.28183e-08	2.7906e-07
GPAA1	8q24.3	-0.240024	3.28826e-08	2.7937e-07
LIG3	17q12	-0.239954	3.31981e-08	2.81691e-07
NR1I3	1q23.3	-0.239934	3.32862e-08	2.82198e-07
ZNF653	19p13.2	-0.239869	3.35782e-08	2.84433e-07
QPCTL	19q13.32	-0.239834	3.37412e-08	2.85531e-07
LINC00479	21q22.3	-0.239803	3.38803e-08	2.86281e-07
DYNLRB1	20q11.22	-0.239803	3.38823e-08	2.86281e-07
ZNF674-AS1	Xp11.3	-0.239752	3.41155e-08	2.88008e-07
GNG3	11q12.3	-0.239677	3.44632e-08	2.90453e-07
RANGAP1	22q13.2	-0.239673	3.44814e-08	2.90483e-07
ATG16L2	11q13.4	-0.239471	3.54337e-08	2.97628e-07
CCDC124	19p13.11	-0.239446	3.55512e-08	2.9849e-07
ZC3HC1	7q32.2	-0.239428	3.56395e-08	2.99106e-07
KIF2C	1p34.1	-0.239318	3.617e-08	3.0343e-07
SRSF12	6q15	-0.239217	3.66656e-08	3.07459e-07
SHKBP1	19q13.2	-0.239128	3.71057e-08	3.10888e-07
NECTIN2	19q13.32	-0.239104	3.72251e-08	3.11758e-07
DPM3	1q22	-0.239054	3.74786e-08	3.13619e-07
IDH3B	20p13	-0.238988	3.78141e-08	3.16029e-07
SH3BP2	4p16.3	-0.238956	3.79778e-08	3.17251e-07
AARS2	6p21.1	-0.238953	3.7992e-08	3.17251e-07
NUF2	1q23.3	-0.238942	3.80484e-08	3.17589e-07
C9ORF163	9q34.3	-0.238907	3.82252e-08	3.18932e-07
SNRPD1	18q11.2	-0.238779	3.88892e-08	3.24066e-07
DHX37	12q24.31	-0.238725	3.91733e-08	3.26298e-07
KRT8	12q13.13	-0.238691	3.93496e-08	3.27493e-07
LZTR1	22q11.21	-0.238653	3.95534e-08	3.29052e-07
FTCD	21q22.3	-0.238633	3.96619e-08	3.29817e-07
RBCK1	20p13	-0.238532	4.01991e-08	3.33534e-07
MTMR9LP	1p35.2	-0.238531	4.02089e-08	3.33534e-07
PQBP1	Xp11.23	-0.238458	4.06011e-08	3.36229e-07
RIPPLY3	21q22.13	-0.238406	4.08867e-08	3.38314e-07
TYMSOS	18p11.32	-0.238397	4.09354e-08	3.38576e-07
SLC25A11	17p13.2	-0.238391	4.09673e-08	3.38701e-07
PDZK1P1	1q21.2	-0.238205	4.20013e-08	3.46784e-07
IRF2BP1	19q13.32	-0.238184	4.21229e-08	3.47535e-07
DDX23	12q13.12	-0.238109	4.25492e-08	3.50908e-07
SNRPG	2p13.3	-0.238032	4.29864e-08	3.54367e-07
CTU1	19q13.41	-0.237995	4.32013e-08	3.55992e-07
ZSWIM3	20q13.12	-0.237874	4.39059e-08	3.61352e-07
CSNK2B	6p21.33	-0.237866	4.39539e-08	3.61598e-07
POLR2F	22q13.1	-0.237772	4.45078e-08	3.65853e-07
NAA60	16p13.3	-0.237662	4.51706e-08	3.70692e-07
LINC00896	22q11.21	-0.237562	4.57745e-08	3.7534e-07
FAM234A	16p13.3	-0.237462	4.63923e-08	3.79938e-07
ZFAND2B	2q35	-0.23739	4.68388e-08	3.83281e-07
TBL3	16p13.3	-0.237379	4.69111e-08	3.83715e-07
SLFN13	17q12	-0.237237	4.7808e-08	3.90253e-07
ZFTRAF1	8q24.3	-0.237231	4.7844e-08	3.90388e-07
ATP5F1D	19p13.3	-0.237219	4.79239e-08	3.9088e-07
POFUT2	21q22.3	-0.237203	4.80234e-08	3.91532e-07
MYL6B	12q13.2	-0.237198	4.8054e-08	3.91621e-07
MED25	19q13.33	-0.237156	4.83258e-08	3.93676e-07
SANBR	2p15	-0.237096	4.87124e-08	3.96502e-07
APEX2	Xp11.21	-0.237001	4.9335e-08	4.01243e-07
SLC4A11	20p13	-0.236894	5.00463e-08	4.06697e-07
TOP3A	17p11.2	-0.236818	5.05507e-08	4.10296e-07
SPACA6	19q13.41	-0.236719	5.12276e-08	4.15453e-07
MRPL36	5p15.33	-0.236699	5.13589e-08	4.16262e-07
COX5B	2q11.2	-0.236682	5.14748e-08	4.1695e-07
NDUFAF5	20p12.1	-0.236672	5.15427e-08	4.17331e-07
UCKL1-AS1	20q13.33	-0.236546	5.24186e-08	4.24079e-07
SLC35B1	17q21.33	-0.236513	5.26453e-08	4.25741e-07
PPP1R27	17q25.3	-0.236461	5.3014e-08	4.2808e-07
AKT1S1	19q13.33	-0.23646	5.30201e-08	4.2808e-07
PHLDB3	19q13.31	-0.236292	5.42142e-08	4.37014e-07
ERAS	Xp11.23	-0.236266	5.44034e-08	4.38363e-07
SLC37A1	21q22.3	-0.236251	5.4514e-08	4.38981e-07
CCDC106	19q13.42	-0.236101	5.56092e-08	4.46639e-07
ACTG1P25	1q32.1	-0.236014	5.62549e-08	4.51643e-07
NAIF1	9q34.11	-0.235938	5.68298e-08	4.55892e-07
SUPT5H	19q13.2	-0.235614	5.93168e-08	4.74131e-07
PI4KAP2	22q11.21	-0.235611	5.93441e-08	4.7416e-07
REXO1	19p13.3	-0.235597	5.94575e-08	4.74687e-07
GRK2	11q13.2	-0.235588	5.95266e-08	4.75049e-07
UVSSA	4p16.3	-0.235454	6.05928e-08	4.83172e-07
DMRTC2	19q13.2	-0.235358	6.13672e-08	4.89151e-07
NCLN	19p13.3	-0.235316	6.17051e-08	4.91617e-07
REC8	14q12	-0.235296	6.18719e-08	4.92585e-07
GUSBP11	22q11.23	-0.235262	6.21504e-08	4.94408e-07
PAXIP1-DT	7q36.2	-0.235215	6.25348e-08	4.96676e-07
ALG1L1P	3q21.2	-0.235036	6.40302e-08	5.07143e-07
LMNTD2	11p15.5	-0.235003	6.43107e-08	5.09163e-07
TSFM	12q14.1	-0.234998	6.4358e-08	5.09335e-07
BRSK1	19q13.42	-0.234989	6.44328e-08	5.09524e-07
NABP2	12q13.3	-0.234907	6.51317e-08	5.14847e-07
MTERF2	12q23.3	-0.234899	6.51989e-08	5.15174e-07
SH2B2	7q22.1	-0.234658	6.73109e-08	5.3143e-07
IFRD1	7q31.1	-0.234641	6.74592e-08	5.32193e-07
RAD54B	8q22.1	-0.234542	6.83447e-08	5.38966e-07
INO80B	2p13.1	-0.234447	6.9209e-08	5.45351e-07
FBXL19-AS1	16p11.2	-0.234425	6.94104e-08	5.46508e-07
TSSK6	19p13.11	-0.234305	7.05171e-08	5.54785e-07
ZNF579	19q13.42	-0.234265	7.08853e-08	5.57462e-07
SLC38A10	17q25.3	-0.234218	7.13255e-08	5.60704e-07
MTA1	14q32.33	-0.234162	7.18508e-08	5.63956e-07
IER5L	9q34.11	-0.23416	7.18714e-08	5.63956e-07
PCNA	20p12.3	-0.234159	7.18804e-08	5.63956e-07
ACAT2	6q25.3	-0.23405	7.2926e-08	5.70592e-07
PIGL	17p11.2	-0.234041	7.30038e-08	5.70978e-07
MAST1	19p13.13	-0.233933	7.40533e-08	5.78733e-07
NEB	2q23.3	-0.233872	7.46512e-08	5.8295e-07
B3GNTL1	17q25.3	-0.233601	7.73504e-08	6.02146e-07
SNRPGP15	19p13.12	-0.233532	7.80531e-08	6.07143e-07
CELSR3	3p21.31	-0.233504	7.83484e-08	6.08967e-07
PSMD13	11p15.5	-0.233492	7.84709e-08	6.09682e-07
YBX2	17p13.1	-0.233417	7.92413e-08	6.15428e-07
CRYGS	3q27.3	-0.233402	7.94042e-08	6.16454e-07
PPP1CA	11q13.2	-0.233372	7.97177e-08	6.18408e-07
LINC00628	1q32.1	-0.233312	8.03433e-08	6.22777e-07
DGKQ	4p16.3	-0.233251	8.09901e-08	6.27062e-07
ANAPC7	12q24.11	-0.233228	8.12273e-08	6.28655e-07
GIPC1	19p13.12	-0.233137	8.22101e-08	6.35769e-07
DOT1L	19p13.3	-0.233077	8.28535e-08	6.40497e-07
FDPS	1q22	-0.233059	8.30455e-08	6.41733e-07
C11ORF80	11q13.2	-0.233004	8.36482e-08	6.45641e-07
BIN1	2q14.3	-0.232924	8.45304e-08	6.51696e-07
PCP2	19p13.2	-0.232913	8.46534e-08	6.52371e-07
RAC3	17q25.3	-0.232815	8.57414e-08	6.60268e-07
TUBB4A	19p13.3	-0.232787	8.60584e-08	6.62454e-07
TOB2P1	6p22.1	-0.232671	8.73788e-08	6.71995e-07
NFKBIL1	6p21.33	-0.232669	8.73986e-08	6.71995e-07
FOXA1	14q21.1	-0.23266	8.74989e-08	6.72507e-07
PIH1D1	19q13.33	-0.23263	8.78491e-08	6.7468e-07
ENTR1	9q34.3	-0.232615	8.80148e-08	6.75693e-07
NADK	1p36.33	-0.232591	8.82879e-08	6.77377e-07
TSEN34	19q13.42	-0.23259	8.83019e-08	6.77377e-07
PMS2P3	7q11.23	-0.232583	8.83891e-08	6.77786e-07
ZNF26	12q24.33	-0.232434	9.01171e-08	6.89978e-07
ASH1L-AS1	1q22	-0.232376	9.08044e-08	6.94973e-07
MTFP1	22q12.2	-0.232368	9.08981e-08	6.95424e-07
LTB4R	14q12	-0.232298	9.17322e-08	7.01269e-07
SFXN5	2p13.2	-0.23218	9.3165e-08	7.11406e-07
RNF183	9q32	-0.23216	9.34057e-08	7.12972e-07
BUD31	7q22.1	-0.232119	9.39086e-08	7.16263e-07
DDIT3	12q13.3	-0.232088	9.42804e-08	7.18551e-07
TBC1D29P	17q11.2	-0.232077	9.44151e-08	7.19304e-07
SCO2	22q13.33	-0.232067	9.45487e-08	7.20047e-07
THUMPD3-AS1	3p25.3	-0.231942	9.60977e-08	7.31008e-07
RNF222	17p13.1	-0.2318	9.78882e-08	7.43779e-07
TNK2	3q29	-0.231754	9.84785e-08	7.47696e-07
HILPDA	7q32.1	-0.231611	1.00329e-07	7.60587e-07
AIMP2	7p22.1	-0.231556	1.01052e-07	7.6549e-07
BRF1	14q32.33	-0.231517	1.01566e-07	7.68799e-07
EPOR	19p13.2	-0.231509	1.01668e-07	7.69233e-07
CCDC86	11q12.2	-0.231505	1.01718e-07	7.69233e-07
ATG9B	7q36.1	-0.231501	1.01777e-07	7.69233e-07
ENOSF1	18p11.32	-0.231393	1.03218e-07	7.79245e-07
ECE2	3q27.1	-0.231329	1.04072e-07	7.85097e-07
RNF207	1p36.31	-0.231304	1.04414e-07	7.86788e-07
RAB11B	19p13.2	-0.231287	1.04643e-07	7.87918e-07
LPAR2	19p13.11	-0.231269	1.04887e-07	7.89453e-07
ABCF3	3q27.1	-0.231092	1.07332e-07	8.0634e-07
TAF10	11p15.4	-0.231081	1.07475e-07	8.0711e-07
ARTN	1p34.1	-0.230937	1.09506e-07	8.21133e-07
NEU1	6p21.33	-0.230923	1.09712e-07	8.22235e-07
KRTCAP2	1q22	-0.230914	1.09835e-07	8.22668e-07
MORC2-AS1	22q12.2	-0.230709	1.12792e-07	8.4356e-07
SPATA2L	16q24.3	-0.230657	1.13556e-07	8.48955e-07
PMF1	1q22	-0.230635	1.13875e-07	8.51017e-07
FBRS	16p11.2	-0.230611	1.14231e-07	8.53045e-07
GRM4	6p21.31	-0.230597	1.14447e-07	8.54015e-07
PYGO2	1q21.3	-0.230569	1.14857e-07	8.56516e-07
CDCA5	11q13.1	-0.230545	1.15216e-07	8.5879e-07
ZNF252P-AS1	8q24.3	-0.230439	1.16805e-07	8.70316e-07
ANKRD54	22q13.1	-0.230434	1.16874e-07	8.70502e-07
B4GALT3	1q23.3	-0.230409	1.17253e-07	8.73003e-07
C4ORF48	4p16.3	-0.230174	1.20875e-07	8.98964e-07
POLR2E	19p13.3	-0.230085	1.22271e-07	9.08328e-07
MORC2	22q12.2	-0.230058	1.22695e-07	9.11144e-07
FAAP20	1p36.33	-0.230051	1.22816e-07	9.11705e-07
TRAPPC5	19p13.2	-0.22996	1.24272e-07	9.20123e-07
PRPF19	11q12.2	-0.22994	1.24585e-07	9.22095e-07
ZCCHC3	20p13	-0.229892	1.25357e-07	9.26779e-07
CDK11B	1p36.33	-0.229779	1.27204e-07	9.39389e-07
MED9	17p11.2	-0.229757	1.27556e-07	9.41402e-07
PSMC3	11p11.2	-0.229746	1.27736e-07	9.42278e-07
ZNF212	7q36.1	-0.229607	1.30056e-07	9.5868e-07
POLRMT	19p13.3	-0.22955	1.31007e-07	9.64624e-07
TTC39A	1p32.3	-0.229396	1.33645e-07	9.82962e-07
HAP1	17q21.2	-0.229329	1.34802e-07	9.91108e-07
INPP5E	9q34.3	-0.229262	1.3597e-07	9.98542e-07
LINC00937	12p13.31	-0.229105	1.38732e-07	1.01739e-06
MRPL23	11p15.5	-0.229056	1.39618e-07	1.02351e-06
PAF1	19q13.2	-0.228988	1.40841e-07	1.03209e-06
LMNB2	19p13.3	-0.228942	1.41681e-07	1.03787e-06
MYO15A	17p11.2	-0.22893	1.41894e-07	1.03905e-06
NACC1	19p13.13	-0.228865	1.43084e-07	1.04738e-06
EIPR1	2p25.3	-0.228843	1.43485e-07	1.04993e-06
SGSM3	22q13.1	-0.228596	1.48106e-07	1.08137e-06
PCSK4	19p13.3	-0.228528	1.4942e-07	1.09017e-06
H2AZ1-DT	4q23	-0.228371	1.52448e-07	1.11065e-06
ASB16	17q21.31	-0.228365	1.52559e-07	1.11104e-06
ACYP1	14q24.3	-0.228355	1.52767e-07	1.11201e-06
RNF126	19p13.3	-0.228353	1.52804e-07	1.11201e-06
BRME1	19p13.12	-0.228334	1.53176e-07	1.11395e-06
C19ORF25	19p13.3	-0.228333	1.53202e-07	1.11395e-06
RNF40	16p11.2	-0.228308	1.53687e-07	1.11682e-06
RASSF7	11p15.5	-0.228197	1.55895e-07	1.13162e-06
RPS19BP1	22q13.1	-0.228071	1.58429e-07	1.14835e-06
RP9P	7p14.3	-0.228053	1.58788e-07	1.15054e-06
ATOH7	10q21.3	-0.227888	1.6218e-07	1.17384e-06
USP21	1q23.3	-0.227801	1.63998e-07	1.18627e-06
ZNF296	19q13.32	-0.227734	1.65401e-07	1.19542e-06
TMCO6	5q31.3	-0.22772	1.65703e-07	1.19717e-06
PTRH1	9q34.11	-0.227619	1.67838e-07	1.21172e-06
SPTBN2	11q13.2	-0.227546	1.69428e-07	1.22232e-06
USF1	1q23.3	-0.227527	1.69827e-07	1.22475e-06
FOXD2-AS1	1p33	-0.227471	1.71046e-07	1.23265e-06
MRPL57	13q12.11	-0.227433	1.71873e-07	1.23816e-06
F8A1	Xq28	-0.227348	1.73749e-07	1.25033e-06
PLEKHG6	12p13.31	-0.227292	1.75001e-07	1.25744e-06
MCM3	6p12.2	-0.227283	1.75208e-07	1.25811e-06
PRORSD1P	2p16.1	-0.22725	1.7594e-07	1.26291e-06
SSBP4	19p13.11	-0.227219	1.76636e-07	1.26746e-06
CDC6	17q21.2	-0.227172	1.77698e-07	1.27416e-06
C19ORF54	19q13.2	-0.227152	1.78151e-07	1.27649e-06
NFKBID	19q13.12	-0.227148	1.78235e-07	1.27664e-06
CSTF2	Xq22.1	-0.227142	1.78387e-07	1.27727e-06
SFSWAP	12q24.33	-0.227125	1.78762e-07	1.27949e-06
TM7SF2	11q13.1	-0.227061	1.80239e-07	1.2896e-06
CENPW	6q22.32	-0.227026	1.81046e-07	1.29492e-06
EXD3	9q34.3	-0.226944	1.82947e-07	1.30664e-06
CCNB2	15q22.2	-0.226921	1.83475e-07	1.30995e-06
CARMIL3	14q11.2	-0.226772	1.86985e-07	1.3331e-06
NDUFB11	Xp11.3	-0.226686	1.89049e-07	1.34638e-06
RFPL3S	22q12.3	-0.226679	1.8922e-07	1.34711e-06
CCDC43	17q21.31	-0.22666	1.89675e-07	1.34987e-06
MCM2	3q21.3	-0.226654	1.89817e-07	1.3504e-06
COMTD1	10q22.2	-0.226595	1.91252e-07	1.35916e-06
LINC01000	7q32.1	-0.226587	1.91445e-07	1.36005e-06
CD27-AS1	12p13.31	-0.22654	1.92595e-07	1.36761e-06
CNFN	19q13.2	-0.226538	1.92646e-07	1.36761e-06
MAMSTR	19q13.33	-0.226501	1.93547e-07	1.37206e-06
CEP250	20q11.22	-0.226447	1.9488e-07	1.38053e-06
SRSF7	2p22.1	-0.226413	1.95721e-07	1.38599e-06
MRPL17	11p15.4	-0.226369	1.9681e-07	1.39321e-06
MEA1	6p21.1	-0.226349	1.97331e-07	1.39641e-06
RAD23A	19p13.13	-0.226292	1.98746e-07	1.40542e-06
HGH1	8q24.3	-0.226188	2.01384e-07	1.42307e-06
NAXE	1q22	-0.226171	2.0183e-07	1.42572e-06
H2AC20	1q21.2	-0.226134	2.02772e-07	1.43187e-06
THAP8	19q13.12	-0.22613	2.02871e-07	1.43206e-06
FIBP	11q13.1	-0.226001	2.06217e-07	1.45362e-06
PCBP4	3p21.2	-0.225893	2.09058e-07	1.47158e-06
CCDC157	22q12.2	-0.225821	2.10979e-07	1.48326e-06
MTERF3	8q22.1	-0.22582	2.11015e-07	1.48326e-06
PFAS	17p13.1	-0.225719	2.13741e-07	1.49926e-06
DHPS	19p13.13	-0.225708	2.14021e-07	1.5007e-06
B4GALT7	5q35.3	-0.225564	2.17957e-07	1.52562e-06
AAMP	2q35	-0.225544	2.18514e-07	1.52845e-06
B4GALNT4	11p15.5	-0.225457	2.20936e-07	1.54377e-06
XRCC1	19q13.31	-0.225413	2.22168e-07	1.55071e-06
LINC00999	10p11.1	-0.225406	2.22375e-07	1.55112e-06
LSMEM2	3p21.31	-0.225117	2.30631e-07	1.60646e-06
NELFE	6p21.33	-0.225112	2.3078e-07	1.60694e-06
CARD14	17q25.3	-0.2251	2.31135e-07	1.60885e-06
WHRN	9q32	-0.225035	2.33028e-07	1.6209e-06
LBX2	2p13.1	-0.225026	2.33304e-07	1.62225e-06
RABGGTA	14q12	-0.225018	2.33539e-07	1.62332e-06
CRIPAK	4p16.3	-0.224964	2.35124e-07	1.63377e-06
IP6K2	3p21.31	-0.224856	2.3835e-07	1.65504e-06
TMEM223	11q12.3	-0.224776	2.40774e-07	1.67071e-06
SPATA20	17q21.33	-0.224502	2.49239e-07	1.72705e-06
CEACAM19	19q13.31	-0.224411	2.52111e-07	1.74634e-06
KLK14	19q13.41	-0.224356	2.53859e-07	1.75607e-06
CFAP119	16p11.2	-0.224356	2.53866e-07	1.75607e-06
ARHGEF10L	1p36.13	-0.224291	2.55949e-07	1.76864e-06
CABYR	18q11.2	-0.22425	2.57269e-07	1.77654e-06
GAPDHS	19q13.12	-0.224126	2.61305e-07	1.80316e-06
FAM83E	19q13.33	-0.224119	2.61535e-07	1.80412e-06
CEACAM5	19q13.2	-0.224098	2.62235e-07	1.80833e-06
ELOB	16p13.3	-0.224088	2.62547e-07	1.80986e-06
HSF1	8q24.3	-0.223957	2.6692e-07	1.8381e-06
C2CD4B	15q22.2	-0.223933	2.67719e-07	1.84296e-06
ATP6V0B	1p34.1	-0.223828	2.71283e-07	1.86621e-06
TLCD3B	16p11.2	-0.223822	2.71475e-07	1.86689e-06
SEMA4B	15q26.1	-0.223815	2.71703e-07	1.86782e-06
PAN2	12q13.3	-0.223802	2.72171e-07	1.87039e-06
RAB4B	19q13.2	-0.22378	2.72914e-07	1.87485e-06
RPTOR	17q25.3	-0.223773	2.73149e-07	1.87582e-06
TMEM134	11q13.2	-0.223745	2.74115e-07	1.88181e-06
CEL	9q34.13	-0.223646	2.77536e-07	1.90203e-06
GINS4	8p11.21	-0.223496	2.82821e-07	1.93361e-06
MPV17L2	19p13.11	-0.223486	2.83165e-07	1.9353e-06
C12ORF73	12q23.3	-0.223452	2.84376e-07	1.94225e-06
RNF31	14q12	-0.223403	2.86123e-07	1.95239e-06
RPAIN	17p13.2	-0.223402	2.86154e-07	1.95239e-06
BAG6	6p21.33	-0.223342	2.88332e-07	1.96591e-06
GPR35	2q37.3	-0.223283	2.90437e-07	1.97757e-06
MVK	12q24.11	-0.223265	2.91104e-07	1.98076e-06
ANO8	19p13.11	-0.223186	2.93992e-07	1.99768e-06
MLXIPL	7q11.23	-0.223183	2.94097e-07	1.99772e-06
DAGLA	11q12.2	-0.223147	2.9543e-07	2.00609e-06
MPLKIP	7p14.1	-0.223132	2.96014e-07	2.00881e-06
SULT1A3	16p11.2	-0.223037	2.99517e-07	2.03109e-06
TMEM89	3p21.31	-0.22302	3.00155e-07	2.03404e-06
CCNQ	Xq28	-0.222777	3.09431e-07	2.09547e-06
MPP3	17q21.31	-0.222743	3.10737e-07	2.1036e-06
RRP9	3p21.2	-0.222692	3.12733e-07	2.11497e-06
ATP6V0E2	7q36.1	-0.222624	3.1541e-07	2.13165e-06
CRTC2	1q21.3	-0.222624	3.15413e-07	2.13165e-06
NDC80	18p11.32	-0.222428	3.23196e-07	2.17983e-06
ZNF764	16p11.2	-0.222375	3.25354e-07	2.19364e-06
NDUFA11	19p13.3	-0.222308	3.28079e-07	2.21127e-06
TMEM199	17q11.2	-0.222242	3.30799e-07	2.2281e-06
KPNA2	17q24.2	-0.22223	3.31286e-07	2.23063e-06
PPIE	1p34.2	-0.222196	3.32694e-07	2.23936e-06
MTA2	11q12.3	-0.222149	3.34651e-07	2.25101e-06
ADM2	22q13.33	-0.222127	3.35571e-07	2.25644e-06
SLIRP	14q24.3	-0.222093	3.36978e-07	2.26514e-06
ZNF3	7q22.1	-0.222029	3.3967e-07	2.27941e-06
CDKN2D	19p13.2	-0.222018	3.40163e-07	2.28174e-06
SHLD1	20p12.3	-0.221958	3.42672e-07	2.29646e-06
RGL2	6p21.32	-0.22195	3.43039e-07	2.29815e-06
COA3	17q21.2	-0.221943	3.43335e-07	2.29937e-06
C1ORF56	1q21.3	-0.221819	3.48691e-07	2.33445e-06
CSAD	12q13.13	-0.221704	3.53707e-07	2.36408e-06
SP9	2q31.1	-0.221686	3.54473e-07	2.36761e-06
ZNF517	8q24.3	-0.221647	3.5622e-07	2.37769e-06
DDTL	22q11.23	-0.221642	3.5642e-07	2.37823e-06
RPUSD3	3p25.3	-0.221626	3.5712e-07	2.38211e-06
SLX1B	16p11.2	-0.221543	3.6083e-07	2.40525e-06
ABHD16A	6p21.33	-0.221492	3.63141e-07	2.41824e-06
PRSS53	16p11.2	-0.22147	3.64109e-07	2.42388e-06
DDT	22q11.23	-0.221452	3.64915e-07	2.42843e-06
WDR45	Xp11.23	-0.221428	3.66018e-07	2.43496e-06
DZANK1	20p11.23	-0.221388	3.67853e-07	2.44636e-06
IRGQ	19q13.31	-0.221355	3.69358e-07	2.45474e-06
LAMTOR4	7q22.1	-0.221326	3.7067e-07	2.46182e-06
GBA2	9p13.3	-0.221281	3.72756e-07	2.47321e-06
PYM1	12q13.2	-0.221274	3.73073e-07	2.47449e-06
AKT2	19q13.2	-0.221177	3.77621e-07	2.50216e-06
COL9A2	1p34.2	-0.221126	3.79998e-07	2.51625e-06
SLC7A5P2	16p12.2	-0.220918	3.89933e-07	2.58032e-06
PKP3	11p15.5	-0.220905	3.90546e-07	2.58352e-06
H2BC17	6p22.1	-0.220896	3.90971e-07	2.58548e-06
URB1-AS1	21q22.11	-0.22071	4.00106e-07	2.64239e-06
HSH2D	19p13.11	-0.220476	4.11805e-07	2.71427e-06
BOLA3	2p13.1	-0.220474	4.11941e-07	2.71427e-06
H1-10-AS1	3q21.3	-0.220462	4.12553e-07	2.71641e-06
ARFIP2	11p15.4	-0.220458	4.12728e-07	2.71641e-06
SH3D21	1p34.3	-0.220438	4.13748e-07	2.7217e-06
FAM227A	22q13.1	-0.2204	4.15728e-07	2.73382e-06
CPLX1	4p16.3	-0.220367	4.17424e-07	2.74317e-06
SLC5A6	2p23.3	-0.22034	4.18794e-07	2.75036e-06
SAMD1	19p13.12	-0.220248	4.23585e-07	2.78092e-06
DUSP12	1q23.3	-0.220194	4.26432e-07	2.79685e-06
UBALD2	17q25.1	-0.220175	4.27416e-07	2.80238e-06
LINC02210	17q21.31	-0.2201	4.31409e-07	2.82671e-06
AMIGO3	3p21.31	-0.220042	4.34479e-07	2.84476e-06
RBM28	7q32.1	-0.22004	4.34591e-07	2.84476e-06
PTDSS2	11p15.5	-0.22001	4.36194e-07	2.85433e-06
EFTUD2	17q21.31	-0.219925	4.40833e-07	2.88373e-06
SLC25A19	17q25.1	-0.219835	4.45709e-07	2.91468e-06
MB	22q12.3	-0.219758	4.49963e-07	2.94153e-06
GSDMB	17q21.1	-0.219752	4.5029e-07	2.94271e-06
CYP4F30P	2q21.1	-0.219692	4.53645e-07	2.96226e-06
FKBP2	11q13.1	-0.21968	4.54294e-07	2.96441e-06
SLC2A8	9q33.3	-0.219679	4.54353e-07	2.96441e-06
VPS37D	7q11.23	-0.219632	4.56997e-07	2.97972e-06
DCST1	1q21.3	-0.219569	4.60592e-07	3.00218e-06
TMEM205	19p13.2	-0.219564	4.60872e-07	3.00303e-06
TARS2	1q21.2	-0.219445	4.67642e-07	3.04416e-06
PRR3	6p21.33	-0.219428	4.68646e-07	3.04872e-06
QPRT	16p11.2	-0.219393	4.70642e-07	3.05872e-06
GPN2	1p36.11	-0.219342	4.73621e-07	3.07707e-06
NECAB3	20q11.22	-0.219302	4.75927e-07	3.09004e-06
NPIPB5	16p12.2	-0.219293	4.7647e-07	3.09257e-06
SLC39A7	6p21.32	-0.219187	4.82697e-07	3.12841e-06
FAM72B	1p11.2	-0.219165	4.84038e-07	3.13558e-06
SPC25	2q31.1	-0.219161	4.84234e-07	3.13583e-06
H3C14	1q21.2	-0.219091	4.8841e-07	3.16186e-06
CSNK1E	22q13.1	-0.219073	4.89534e-07	3.16708e-06
DUS3L	19p13.3	-0.219063	4.90145e-07	3.17001e-06
UCN	2p23.3	-0.218939	4.97622e-07	3.21524e-06
COG1	17q25.1	-0.218926	4.98409e-07	3.21929e-06
TMEM79	1q22	-0.218918	4.98887e-07	3.22134e-06
MRPL4	19p13.2	-0.218846	5.03323e-07	3.24788e-06
FAM131A	3q27.1	-0.218684	5.13431e-07	3.30883e-06
RAB6B	3q22.1	-0.218673	5.1412e-07	3.31221e-06
PTBP2	1p21.3	-0.218664	5.14689e-07	3.31481e-06
METTL26	16p13.3	-0.218608	5.1825e-07	3.33666e-06
WDR46	6p21.32	-0.218581	5.19967e-07	3.34664e-06
CCDC120	Xp11.23	-0.218574	5.2041e-07	3.34841e-06
SPDYA	2p23.2	-0.218479	5.26482e-07	3.3853e-06
POLE2	14q21.3	-0.218441	5.28922e-07	3.3988e-06
CDK11A	1p36.33	-0.218333	5.36011e-07	3.44215e-06
OTX1	2p15	-0.218311	5.37425e-07	3.45012e-06
MRPL9	1q21.3	-0.218175	5.46454e-07	3.50696e-06
ABT1	6p22.2	-0.218154	5.47854e-07	3.51481e-06
SPOUT1	9q34.11	-0.218078	5.52959e-07	3.54642e-06
HES1	3q29	-0.218024	5.56602e-07	3.56179e-06
UQCC1	20q11.22	-0.217982	5.59491e-07	3.57913e-06
ERCC3	2q14.3	-0.217959	5.61066e-07	3.58691e-06
COPS9	2q37.3	-0.217939	5.62399e-07	3.59314e-06
RAB17	2q37.3	-0.21793	5.63014e-07	3.59592e-06
PCGF2	17q12	-0.217908	5.64545e-07	3.60454e-06
PRDM15	21q22.3	-0.217902	5.64946e-07	3.60595e-06
CLSTN3	12p13.31	-0.217883	5.66265e-07	3.61224e-06
CRYBB3	22q11.23	-0.217838	5.6943e-07	3.62994e-06
CCNE2	8q22.1	-0.217822	5.70512e-07	3.63452e-06
MAGEC3	Xq27.2	-0.217787	5.72937e-07	3.64764e-06
PMS2CL	7p22.1	-0.217781	5.73391e-07	3.64936e-06
CCDC88B	11q13.1	-0.217688	5.79933e-07	3.68631e-06
RAI1	17p11.2	-0.217556	5.89305e-07	3.74112e-06
SGSH	17q25.3	-0.217473	5.95318e-07	3.7757e-06
CHKB-DT	22q13.33	-0.217414	5.99635e-07	3.80141e-06
NCAPH2	22q13.33	-0.217391	6.01296e-07	3.80999e-06
SDF2L1	22q11.21	-0.217362	6.03437e-07	3.82234e-06
AGAP4	10q11.22	-0.217284	6.092e-07	3.85396e-06
EHMT1	9q34.3	-0.217264	6.10695e-07	3.86098e-06
CNPY2	12q13.3	-0.217164	6.18162e-07	3.90695e-06
KIAA2013	1p36.22	-0.217102	6.22855e-07	3.93412e-06
ERBB2	17q12	-0.217038	6.27708e-07	3.96227e-06
C1QTNF12	1p36.33	-0.217005	6.30226e-07	3.97691e-06
AVP	20p13	-0.216988	6.31482e-07	3.98358e-06
SERINC4	15q15.3	-0.216942	6.3509e-07	4.00508e-06
TRIP13	5p15.33	-0.216898	6.38446e-07	4.02497e-06
FGL1	8p22	-0.216887	6.39351e-07	4.0294e-06
SLC50A1	1q22	-0.216844	6.4267e-07	4.04522e-06
RNASEH2C	11q13.1	-0.216816	6.44829e-07	4.05753e-06
CLN6	15q23	-0.216737	6.51054e-07	4.08898e-06
SRC	20q11.23	-0.216693	6.54529e-07	4.10951e-06
PRAC2	17q21.32	-0.216667	6.56611e-07	4.12129e-06
TBX10	11q13.2	-0.216644	6.58434e-07	4.13143e-06
SH3BP5L	1q44	-0.216621	6.60301e-07	4.14185e-06
DHX30	3p21.31	-0.216602	6.6184e-07	4.1489e-06
SIX3	2p21	-0.216508	6.69409e-07	4.19372e-06
MCM5	22q12.3	-0.216488	6.71046e-07	4.20134e-06
MYADML2	17q25.3	-0.216479	6.71745e-07	4.2044e-06
PPM1G	2p23.3	-0.21643	6.7578e-07	4.22701e-06
SURF2	9q34.2	-0.216148	6.99294e-07	4.36998e-06
GRB7	17q12	-0.216131	7.00677e-07	4.37726e-06
SMARCD1	12q13.12	-0.216054	7.0727e-07	4.41431e-06
DNAJB11	3q27.3	-0.216032	7.09161e-07	4.42197e-06
ZNF837	19q13.43	-0.215926	7.18277e-07	4.47324e-06
FAM178B	2q11.2	-0.215897	7.20843e-07	4.48642e-06
TRAP1	16p13.3	-0.215882	7.22128e-07	4.49301e-06
RABAC1	19q13.2	-0.215852	7.24794e-07	4.50428e-06
ACTL10	20q11.22	-0.215829	7.26752e-07	4.51336e-06
TOMM40L	1q23.3	-0.215819	7.27638e-07	4.51745e-06
ING5	2q37.3	-0.215814	7.28088e-07	4.51885e-06
RETNLB	3q13.13	-0.215779	7.3121e-07	4.53682e-06
SMIM24	19p13.3	-0.215757	7.33159e-07	4.54641e-06
ATAD5	17q11.2	-0.215756	7.33211e-07	4.54641e-06
MIS18A	21q22.11	-0.215705	7.37721e-07	4.57296e-06
NRADDP	3p21.31	-0.215655	7.4218e-07	4.59774e-06
SURF6	9q34.2	-0.215635	7.43974e-07	4.606e-06
KISS1R	19p13.3	-0.215595	7.47607e-07	4.62563e-06
MED19	11q12.1	-0.215553	7.5143e-07	4.64785e-06
RDH13	19q13.42	-0.215532	7.53308e-07	4.6566e-06
FTSJ1	Xp11.23	-0.215532	7.53311e-07	4.6566e-06
TAS2R20	12p13.2	-0.215488	7.57317e-07	4.67992e-06
NUDT16L1	16p13.3	-0.215381	7.67193e-07	4.73802e-06
LRRC75B	22q11.23	-0.215366	7.68577e-07	4.7451e-06
COPS6	7q22.1	-0.215352	7.69834e-07	4.75007e-06
SKA3	13q12.11	-0.21533	7.71885e-07	4.76111e-06
FAM104A	17q25.1	-0.215199	7.84193e-07	4.83404e-06
RND2	17q21.31	-0.215159	7.87964e-07	4.8543e-06
PISD	22q12.2	-0.215138	7.89958e-07	4.86508e-06
ASIC3	7q36.1	-0.215069	7.96583e-07	4.90135e-06
TNK1	17p13.1	-0.215025	8.00833e-07	4.91993e-06
EXOSC5	19q13.2	-0.214951	8.07977e-07	4.96077e-06
PPIEL	1p34.3	-0.214908	8.12191e-07	4.98358e-06
FOXM1	12p13.33	-0.21488	8.14886e-07	4.99705e-06
PPP1R14D	15q15.1	-0.214812	8.2165e-07	5.03426e-06
ZNF628	19q13.42	-0.214729	8.29834e-07	5.08092e-06
MYH6	14q11.2	-0.214574	8.45462e-07	5.17186e-06
ISG20	15q26.1	-0.21449	8.54006e-07	5.22093e-06
DPH1	17p13.3	-0.214476	8.55503e-07	5.22848e-06
TSNARE1	8q24.3	-0.214458	8.57326e-07	5.23788e-06
CER1	9p22.3	-0.214382	8.65237e-07	5.27829e-06
MRPS7	17q25.1	-0.214359	8.67623e-07	5.29123e-06
TMEM138	11q12.2	-0.214133	8.91456e-07	5.42995e-06
TMPRSS5	11q23.2	-0.21413	8.9174e-07	5.43002e-06
AMDHD2	16p13.3	-0.2141	8.94907e-07	5.44765e-06
ALX1	12q21.31	-0.214059	8.99319e-07	5.47118e-06
CDC25A	3p21.31	-0.213951	9.11043e-07	5.53576e-06
DCAF4L1	4p13	-0.213918	9.14721e-07	5.55022e-06
PXMP2	12q24.33	-0.213868	9.20167e-07	5.58102e-06
METTL21A	2q33.3	-0.213854	9.2169e-07	5.58857e-06
PSMG4	6p25.2	-0.213777	9.30258e-07	5.63539e-06
CALY	10q26.3	-0.213752	9.33076e-07	5.65075e-06
WDR27	6q27	-0.213729	9.3565e-07	5.66462e-06
NEK8	17q11.2	-0.213725	9.36078e-07	5.6655e-06
FAM89B	11q13.1	-0.213586	9.51759e-07	5.7517e-06
LUC7L3	17q21.33	-0.213435	9.69129e-07	5.84606e-06
GARIN2	14q23.3	-0.213345	9.79542e-07	5.90353e-06
TRPC4AP	20q11.22	-0.213263	9.89272e-07	5.95624e-06
HSD17B3	9q22.32	-0.213261	9.89478e-07	5.95624e-06
IMP4	2q21.1	-0.213216	9.94765e-07	5.98266e-06
PRR5	22q13.31	-0.213156	1.00199e-06	6.02429e-06
LINC00461	5q14.3	-0.213134	1.00453e-06	6.03593e-06
DDX54	12q24.13	-0.213064	1.01297e-06	6.083e-06
ABCD1	Xq28	-0.213053	1.0144e-06	6.08792e-06
TUBB2A	6p25.2	-0.212993	1.02159e-06	6.12506e-06
RBM19	12q24.13-q24.21	-0.212981	1.02308e-06	6.13084e-06
MRPL53	2p13.1	-0.212863	1.03761e-06	6.21045e-06
PRKCSH	19p13.2	-0.212846	1.03971e-06	6.22114e-06
RRP7A	22q13.2	-0.212727	1.05453e-06	6.2985e-06
ELP5	17p13.1	-0.21267	1.06177e-06	6.33798e-06
ADAT3	19p13.3	-0.212652	1.06404e-06	6.34963e-06
COCH	14q12	-0.212589	1.07205e-06	6.39362e-06
TEX45	19p13.2	-0.212272	1.11317e-06	6.62501e-06
PDCD5	19q13.11	-0.212239	1.11753e-06	6.64899e-06
ALX3	1p13.3	-0.212194	1.12362e-06	6.6823e-06
MARS1	12q13.3	-0.212175	1.12615e-06	6.69425e-06
PRAME	22q11.22	-0.212031	1.14549e-06	6.79714e-06
EPCAM	2p21	-0.211969	1.15393e-06	6.84311e-06
ZYG11A	1p32.3	-0.211953	1.15623e-06	6.85476e-06
VPS9D1	16q24.3	-0.211917	1.16111e-06	6.88165e-06
NSD2	4p16.3	-0.211884	1.16563e-06	6.90638e-06
NDUFA13	19p13.11	-0.211815	1.17527e-06	6.95939e-06
REEP4	8p21.3	-0.21181	1.17601e-06	6.96171e-06
SLC2A4RG	20q13.33	-0.211796	1.17796e-06	6.97119e-06
NANOS3	19p13.12	-0.211739	1.18583e-06	7.01361e-06
EXOC3-AS1	5p15.33	-0.211706	1.19053e-06	7.03933e-06
ZNRD2	11q13.1	-0.211697	1.19188e-06	7.04522e-06
EDC4	16q22.1	-0.211678	1.19455e-06	7.05679e-06
FOXG1	14q12	-0.211668	1.19586e-06	7.06246e-06
MBD6	12q13.3	-0.211445	1.22797e-06	7.23287e-06
NRF1	7q32.2	-0.211425	1.23086e-06	7.24565e-06
LINC00482	17q25.3	-0.211391	1.23578e-06	7.26817e-06
SLC5A5	19p13.11	-0.211383	1.23701e-06	7.27324e-06
PDHA1	Xp22.12	-0.211364	1.23974e-06	7.28501e-06
UPF3B	Xq24	-0.211275	1.25281e-06	7.35966e-06
HSPB11	1p32.3	-0.211242	1.25776e-06	7.38398e-06
HDHD5	22q11.1	-0.211212	1.26225e-06	7.40424e-06
RANBP3	19p13.3	-0.2112	1.26405e-06	7.41264e-06
MFSD3	8q24.3	-0.211193	1.26507e-06	7.41641e-06
HIC2	22q11.21	-0.211184	1.26639e-06	7.42127e-06
LTB4R2	14q12	-0.211183	1.26664e-06	7.42127e-06
SLC25A47	14q32.2	-0.211124	1.27546e-06	7.46202e-06
SLC5A10	17p11.2	-0.211054	1.28599e-06	7.51705e-06
DLGAP4	20q11.23	-0.21096	1.30034e-06	7.59724e-06
PRR7	5q35.3	-0.21096	1.30047e-06	7.59724e-06
BLM	15q26.1	-0.210941	1.30333e-06	7.60794e-06
CFHR5	1q31.3	-0.21094	1.30345e-06	7.60794e-06
PEMT	17p11.2	-0.210835	1.31979e-06	7.69886e-06
MIDN	19p13.3	-0.210801	1.3251e-06	7.72756e-06
SPATC1L	21q22.3	-0.210768	1.33027e-06	7.75544e-06
AKR7L	1p36.13	-0.210755	1.33222e-06	7.76412e-06
KIF4A	Xq13.1	-0.210753	1.33253e-06	7.76412e-06
PRPF39	14q21.2	-0.210642	1.35019e-06	7.86469e-06
CKM	19q13.32	-0.210637	1.35088e-06	7.86641e-06
EPO	7q22.1	-0.210627	1.35259e-06	7.87408e-06
SPRYD4	12q13.3	-0.210588	1.35883e-06	7.9081e-06
DNAJC5	20q13.33	-0.210544	1.3659e-06	7.94296e-06
DNAJB2	2q35	-0.210535	1.36734e-06	7.94838e-06
TSR3	16p13.3	-0.210496	1.37352e-06	7.97574e-06
AGAP6	10q11.23	-0.210496	1.37364e-06	7.97574e-06
TRIM28	19q13.43	-0.210256	1.41295e-06	8.19205e-06
CEACAM1	19q13.2	-0.210234	1.4166e-06	8.21026e-06
TFF3	21q22.3	-0.210232	1.41691e-06	8.21026e-06
SKA1	18q21.1	-0.210184	1.42495e-06	8.25447e-06
NAGLU	17q21.2	-0.210138	1.43276e-06	8.29491e-06
MAGEA3	Xq28	-0.21009	1.44078e-06	8.33891e-06
SLX9	21q22.3	-0.210087	1.44126e-06	8.33928e-06
DIS3L2	2q37.1	-0.20996	1.46299e-06	8.46013e-06
GRWD1	19q13.33	-0.209814	1.48839e-06	8.60201e-06
F7	13q34	-0.209776	1.49505e-06	8.63554e-06
TMEM147	19q13.12	-0.20964	1.51902e-06	8.76636e-06
PES 1.00	22q12.2	-0.209591	1.52769e-06	8.81134e-06
RNF215	22q12.2	-0.20951	1.54233e-06	8.88806e-06
SLC22A20P	11q13.1	-0.209503	1.54356e-06	8.89006e-06
PRSS8	16p11.2	-0.209414	1.55976e-06	8.97559e-06
NDUFAF8	17q25.3	-0.20932	1.57718e-06	9.07061e-06
PDIA4	7q36.1	-0.209274	1.5857e-06	9.11437e-06
ZNF746	7q36.1	-0.209214	1.59672e-06	9.17244e-06
MRPS15	1p34.3	-0.209123	1.61394e-06	9.26791e-06
MARK1	1q41	-0.209068	1.62424e-06	9.32045e-06
SWI5	9q34.11	-0.209066	1.62474e-06	9.32045e-06
WDR13	Xp11.23	-0.209032	1.63124e-06	9.35459e-06
FANCI	15q26.1	-0.209028	1.63195e-06	9.35599e-06
SNTA1	20q11.21	-0.208967	1.64356e-06	9.41716e-06
SPSB2	12p13.31	-0.208955	1.64586e-06	9.42762e-06
ARIH2OS	3p21.31	-0.208919	1.65289e-06	9.46516e-06
CLEC18A	16q22.1	-0.20889	1.65847e-06	9.49169e-06
NYX	Xp11.4	-0.208803	1.6755e-06	9.58364e-06
EIF2B5	3q27.1	-0.208793	1.6775e-06	9.59236e-06
KLF1	19p13.13	-0.208741	1.68768e-06	9.64781e-06
RAD51C	17q22	-0.20867	1.70177e-06	9.72281e-06
TUBA1C	12q13.12	-0.208639	1.70781e-06	9.75449e-06
BEST4	1p34.1	-0.208619	1.71181e-06	9.77455e-06
CPNE1	20q11.22	-0.208586	1.71845e-06	9.80971e-06
NKPD1	19q13.32	-0.208504	1.73499e-06	9.89283e-06
GPC1-AS1	2q37.3	-0.208468	1.74232e-06	9.92892e-06
PEX10	1p36.32	-0.208356	1.76517e-06	1.00475e-05
CENPA	2p23.3	-0.208354	1.76563e-06	1.00475e-05
MAP4K2	11q13.1	-0.208327	1.77116e-06	1.00761e-05
PDCD6	5p15.33	-0.208281	1.78075e-06	1.01191e-05
PGS1	17q25.3	-0.208228	1.79183e-06	1.01734e-05
SNHG9	16p13.3	-0.207967	1.84712e-06	1.04695e-05
H1-0	22q13.1	-0.207955	1.84959e-06	1.04805e-05
ANKRD13B	17q11.2	-0.207933	1.85438e-06	1.04987e-05
SEPTIN9	17q25.3	-0.20778	1.88757e-06	1.06745e-05
FOXD3	1p31.3	-0.207695	1.90651e-06	1.07694e-05
XRCC2	7q36.1	-0.207626	1.9217e-06	1.08521e-05
COX17	3q13.33	-0.207572	1.93397e-06	1.09184e-05
SP8	7p21.1	-0.207492	1.95182e-06	1.10129e-05
RGS12	4p16.3	-0.207484	1.95383e-06	1.10212e-05
STK19	6p21.33	-0.207468	1.9574e-06	1.10382e-05
ZNF593	1p36.11	-0.207255	2.00641e-06	1.13018e-05
EIF2AK1	7p22.1	-0.207236	2.01088e-06	1.13238e-05
DND1	5q31.3	-0.207226	2.01305e-06	1.13328e-05
HERC2P2	15q11.2	-0.207011	2.06397e-06	1.15848e-05
AIFM3	22q11.21	-0.206913	2.08737e-06	1.17117e-05
CRTC1	19p13.11	-0.206889	2.0933e-06	1.17416e-05
PRSS22	16p13.3	-0.206859	2.10049e-06	1.17754e-05
CIB1	15q26.1	-0.206827	2.10847e-06	1.18168e-05
MCM8	20p12.3	-0.206758	2.12531e-06	1.19045e-05
NUP62	19q13.33	-0.206745	2.1285e-06	1.19157e-05
GEN1	2p24.2	-0.206733	2.13131e-06	1.19281e-05
ZBTB12	6p21.33	-0.206728	2.13259e-06	1.19319e-05
LINC00623	1p11.2	-0.206547	2.17782e-06	1.21577e-05
GOLGA8A	15q14	-0.206539	2.17976e-06	1.21652e-05
EFNA4	1q21.3	-0.206452	2.20177e-06	1.22777e-05
HCFC1	Xq28	-0.206448	2.2029e-06	1.22806e-05
ZNF767P	7q36.1	-0.206302	2.24039e-06	1.24618e-05
NELFB	9q34.3	-0.20629	2.24341e-06	1.24751e-05
RNF34	12q24.31	-0.206276	2.24689e-06	1.24907e-05
ESPN	1p36.31	-0.206259	2.25145e-06	1.25094e-05
VCX	Xp22.31	-0.206206	2.26523e-06	1.25825e-05
DEDD2	19q13.2	-0.206046	2.30739e-06	1.2806e-05
TMTC4	13q32.3	-0.206008	2.31765e-06	1.28593e-05
ETV4	17q21.31	-0.205963	2.32974e-06	1.29193e-05
SUGP2	19p13	-0.205813	2.37016e-06	1.31219e-05
MRPL58	17q25.1	-0.205813	2.37023e-06	1.31219e-05
C6ORF226	6p21.1	-0.205787	2.37728e-06	1.31573e-05
LBX2-AS1	2p13.1	-0.205604	2.42795e-06	1.34155e-05
ANKLE1	19p13.11	-0.205576	2.43565e-06	1.34543e-05
SPG7	16q24.3	-0.205534	2.44765e-06	1.35169e-05
CARD19	9q22.31	-0.205516	2.45272e-06	1.35411e-05
SLC5A11	16p12.1	-0.205476	2.46384e-06	1.3595e-05
MYG1	12q13.13	-0.205459	2.46866e-06	1.36178e-05
ST20	15q25.1	-0.205391	2.48816e-06	1.3714e-05
DTX2P1-UPK3BP1-PMS2P11	7q11.23	-0.205291	2.51687e-06	1.38632e-05
MAD2L2	1p36.22	-0.20529	2.5173e-06	1.38632e-05
ELMOD3	2p11.2	-0.205271	2.52274e-06	1.38893e-05
LRP5	11q13.2	-0.205238	2.53221e-06	1.39376e-05
CHMP6	17q25.3	-0.205205	2.54187e-06	1.39869e-05
TUFT1	1q21.3	-0.20518	2.54921e-06	1.40196e-05
SLC12A9	7q22.1	-0.205147	2.55891e-06	1.40613e-05
SNHG1	11q12.3	-0.20512	2.5667e-06	1.41003e-05
SNORA71E	20q11.23	-0.20511	2.56966e-06	1.41127e-05
TEN1	17q25.1	-0.204988	2.606e-06	1.43005e-05
ABCC10	6p21.1	-0.204965	2.61291e-06	1.43345e-05
MZF1	19q13.43	-0.204945	2.61875e-06	1.43586e-05
STIP1	11q13.1	-0.204923	2.62559e-06	1.43921e-05
HMGB3	Xq28	-0.204919	2.62671e-06	1.43944e-05
DYRK1B	19q13.2	-0.204826	2.65471e-06	1.45398e-05
DNPEP	2q35	-0.204815	2.65833e-06	1.45557e-05
FAAP24	19q13.11	-0.204798	2.66336e-06	1.45792e-05
GRAMD1A	19q13.11	-0.204759	2.67534e-06	1.46368e-05
CBS	21q22.3	-0.204679	2.69989e-06	1.4763e-05
EVX1	7p15.2	-0.20467	2.70283e-06	1.4775e-05
MRPS24	7p13	-0.204617	2.71912e-06	1.48519e-05
NIT2	3q12.2	-0.204609	2.72164e-06	1.48616e-05
ZBTB49	4p16.3	-0.204574	2.73267e-06	1.49178e-05
MGME1	20p11.23	-0.204551	2.73987e-06	1.4953e-05
TEX101	19q13.31	-0.204465	2.76678e-06	1.50875e-05
INE1	Xp11.3	-0.204429	2.77815e-06	1.51453e-05
DUSP23	1q23.2	-0.20442	2.78119e-06	1.51578e-05
ELAC2	17p12	-0.204407	2.78528e-06	1.51759e-05
TMEM106C	12q13.11	-0.204388	2.79134e-06	1.52048e-05
HAVCR1P1	19p12	-0.204346	2.80464e-06	1.52731e-05
CDK9	9q34.11	-0.204285	2.82449e-06	1.53728e-05
FHIP2B	8p21.3	-0.204239	2.83925e-06	1.54489e-05
BICDL1	12q24.23	-0.204212	2.84794e-06	1.54892e-05
LSS	21q22.3	-0.204188	2.85586e-06	1.55224e-05
ISYNA1	19p13.11	-0.204184	2.85717e-06	1.55253e-05
WRNIP1	6p25.2	-0.20417	2.86179e-06	1.55462e-05
DIDO1	20q13.33	-0.204006	2.91605e-06	1.58152e-05
TNPO2	19p13.13	-0.204001	2.91746e-06	1.58186e-05
TMEM9	1q32.1	-0.203997	2.91882e-06	1.58216e-05
ECH1	19q13.2	-0.203898	2.95201e-06	1.59972e-05
PLOD3	7q22.1	-0.203869	2.96183e-06	1.60417e-05
SNHG12	1p35.3	-0.20378	2.99193e-06	1.61964e-05
BRCA1	17q21.31	-0.20378	2.99202e-06	1.61964e-05
SPTBN5	15q21	-0.203757	3.00006e-06	1.62355e-05
BAIAP2L1	7q21.3-q22.1	-0.203743	3.00484e-06	1.6257e-05
TCOF1	5q32-q33.1	-0.203705	3.01781e-06	1.63139e-05
CRELD2	22q13.33	-0.203606	3.05192e-06	1.64924e-05
PNPT1	2p16.1	-0.203605	3.05247e-06	1.64924e-05
WDR83	19p13.13	-0.203595	3.0557e-06	1.65054e-05
MSI1	12q24.31	-0.203586	3.05902e-06	1.65189e-05
PRR35	16p13.3	-0.203565	3.06641e-06	1.65543e-05
CYP2D6	22q13.2	-0.203417	3.11845e-06	1.68216e-05
HOXD13	2q31.1	-0.20333	3.14926e-06	1.69741e-05
NEK2	1q32.3	-0.203312	3.15596e-06	1.70056e-05
TPX2	20q11.21	-0.20328	3.16752e-06	1.70587e-05
TMEM249	8q24.3	-0.203276	3.16877e-06	1.70608e-05
TMEM161A	19p13.11	-0.203271	3.17049e-06	1.70623e-05
FAM72D	1q21.1	-0.203271	3.17076e-06	1.70623e-05
POLD2	7p13	-0.20322	3.18911e-06	1.71473e-05
NOL7	6p23	-0.203188	3.20082e-06	1.72009e-05
RCC1	1p35.3	-0.203157	3.21186e-06	1.72557e-05
TYK2	19p13.2	-0.203004	3.26839e-06	1.75452e-05
COQ9	16q21	-0.203001	3.26951e-06	1.75465e-05
MRPS17	7p11.2	-0.202994	3.27197e-06	1.7555e-05
ATP6V1C2	2p25.1	-0.202988	3.27423e-06	1.75624e-05
OR7E156P	13q21.31	-0.202936	3.29366e-06	1.76524e-05
SRRM2-AS1	16p13.3	-0.202925	3.29789e-06	1.76704e-05
ROGDI	16p13.3	-0.202833	3.33229e-06	1.78403e-05
NPIPA1	16p13.11	-0.202819	3.33765e-06	1.78642e-05
MRPL21	11q13.3	-0.202707	3.3804e-06	1.80785e-05
ZACN	17q25.1	-0.202652	3.40153e-06	1.81867e-05
LINC01512	6p21.1	-0.202633	3.40877e-06	1.82205e-05
TEFM	17q11.2	-0.202588	3.42634e-06	1.82998e-05
NDUFC2	11q14.1	-0.202479	3.46895e-06	1.85224e-05
SEMA4C	2q11.2	-0.202438	3.48506e-06	1.86034e-05
MIX23	3q21.1	-0.202428	3.48887e-06	1.86188e-05
SLC28A1	15q25.3	-0.202416	3.49377e-06	1.864e-05
ASRGL1	11q12.3	-0.2024	3.50021e-06	1.86644e-05
TECPR1	7q21.3	-0.202345	3.52196e-06	1.87603e-05
ZNF337	20p11.21	-0.202333	3.52681e-06	1.87811e-05
DNTTIP1	20q13.12	-0.2023	3.53969e-06	1.88297e-05
KREMEN2	16p13.3	-0.202186	3.5859e-06	1.90594e-05
NAP1L4	11p15.4	-0.202182	3.58763e-06	1.90594e-05
GNG5	1p22.3	-0.202047	3.64266e-06	1.93363e-05
BICDL2	16p13.3	-0.201976	3.6718e-06	1.94858e-05
NTMT1	9q34.11	-0.201926	3.69261e-06	1.95858e-05
HSD17B7	1q23.3	-0.201913	3.69805e-06	1.96095e-05
GNB2	7q22.1	-0.2019	3.70368e-06	1.96341e-05
SLC12A7	5p15.33	-0.201854	3.72302e-06	1.97209e-05
SPC24	19p13.2	-0.201833	3.73185e-06	1.97625e-05
DRD4	11p15.5	-0.201826	3.73477e-06	1.9766e-05
TXNL4A	18q23	-0.201814	3.73985e-06	1.97787e-05
IQCC	1p35.2	-0.20179	3.74994e-06	1.98216e-05
LYPD4	19q13.2	-0.201736	3.77286e-06	1.99374e-05
EDF1	9q34.3	-0.201684	3.79498e-06	2.00384e-05
ATP6V0E2-AS1	7q36.1	-0.201627	3.81979e-06	2.01641e-05
VAPB	20q13.32	-0.201623	3.8211e-06	2.01657e-05
NCAPH	2q11.2	-0.201575	3.84223e-06	2.02665e-05
ARL17A	17q21.31	-0.201523	3.86453e-06	2.03626e-05
CCT6P1	7q11.21	-0.201463	3.89102e-06	2.04968e-05
CDRT4	17p12	-0.201457	3.89361e-06	2.05051e-05
CAPN12	19q13.2	-0.201409	3.91474e-06	2.06109e-05
LRRC56	11p15.5	-0.201385	3.92542e-06	2.06617e-05
EMC10	19q13.33	-0.201365	3.93394e-06	2.06956e-05
NFE2L3P2	17q21.32	-0.201345	3.94284e-06	2.0737e-05
ARL8A	1q32.1	-0.201298	3.96395e-06	2.08426e-05
AQP11	11q14.1	-0.201271	3.9761e-06	2.08954e-05
ADCK1	14q24.3	-0.201252	3.98467e-06	2.0935e-05
HM13	20q11.21	-0.201142	4.03425e-06	2.11676e-05
GNG4	1q42.3	-0.201111	4.0481e-06	2.12291e-05
PRC1	15q26.1	-0.20104	4.08063e-06	2.13885e-05
TTLL4	2q35	-0.200923	4.13473e-06	2.16494e-05
PLAC1	Xq26.3	-0.200855	4.1664e-06	2.18095e-05
GPT2	16q11.2	-0.200825	4.18066e-06	2.18727e-05
NDUFS3	11p11.2	-0.200648	4.26459e-06	2.23001e-05
HSPB1	7q11.23	-0.200464	4.3533e-06	2.27339e-05
KLK12	19q13.41	-0.200462	4.35436e-06	2.27339e-05
RUNDC1	17q21.31	-0.200366	4.40161e-06	2.29626e-05
HASPIN	17p13.2	-0.200332	4.41829e-06	2.30376e-05
PDCL3	2q11.2	-0.200191	4.48844e-06	2.33789e-05
EXO1	1q43	-0.200184	4.49197e-06	2.33913e-05
NRSN2	20p13	-0.200157	4.50589e-06	2.34576e-05
PLEKHH1	14q24.1	-0.200049	4.5608e-06	2.37188e-05
NPM2	8p21.3	-0.200044	4.56303e-06	2.37242e-05
KSR1	17q11.2	-0.19999	4.59086e-06	2.38514e-05
NDUFA7	19p13.2	-0.199891	4.64166e-06	2.41017e-05
WDR5	9q34.2	-0.199864	4.65606e-06	2.41702e-05
FGB	4q31.3	-0.199818	4.67975e-06	2.42805e-05
DNMT1	19p13.2	-0.199812	4.68331e-06	2.42927e-05
ZBED10P	7q36.1	-0.199773	4.70344e-06	2.43845e-05
CENPB	20p13	-0.199768	4.70623e-06	2.43926e-05
KCNIP3	2q11.1	-0.199733	4.72467e-06	2.44698e-05
SNRPB2	20p12.1	-0.199683	4.75124e-06	2.45876e-05
NCAPG	4p15.31	-0.199523	4.83673e-06	2.50042e-05
LCDR	20p11.23	-0.199486	4.85665e-06	2.51006e-05
BCKDK	16p11.2	-0.199469	4.86617e-06	2.51433e-05
SBF1	22q13.33	-0.199451	4.8757e-06	2.51796e-05
RAX	18q21.32	-0.199437	4.88329e-06	2.52123e-05
TTC32	2p24.1	-0.199393	4.9075e-06	2.53307e-05
OPLAH	8q24.3	-0.199261	4.9801e-06	2.56919e-05
FAM157B	9q34.3	-0.199205	5.01164e-06	2.58282e-05
PPP1R3E	14q11.2	-0.1992	5.01413e-06	2.58344e-05
ARMC5	16p11.2	-0.199158	5.03762e-06	2.59487e-05
ERI3	1p34.1	-0.199144	5.04532e-06	2.59817e-05
ANKRD36	2q11.2	-0.199117	5.06058e-06	2.60536e-05
HTRA2	2p13.1	-0.199054	5.09658e-06	2.62119e-05
H2AB1	Xq28	-0.199036	5.10684e-06	2.62512e-05
ZNF232	17p13.2	-0.199012	5.12024e-06	2.63133e-05
NR2C2AP	19p13.11	-0.199004	5.12495e-06	2.63239e-05
VPS33B	15q26.1	-0.19899	5.13308e-06	2.63589e-05
COG7	16p12.2	-0.19895	5.156e-06	2.64631e-05
ABCB8	7q36.1	-0.198901	5.18403e-06	2.65933e-05
SEC61B	9q22.33	-0.198897	5.18598e-06	2.65965e-05
OR2B6	6p22.1	-0.198864	5.20522e-06	2.66883e-05
PCIF1	20q13.12	-0.198856	5.20984e-06	2.67051e-05
TMEM60	7q11.23	-0.198849	5.21387e-06	2.67189e-05
ZNF696	8q24.3	-0.19884	5.21941e-06	2.67405e-05
GALR3	22q13.1	-0.198834	5.2225e-06	2.67494e-05
FSCN2	17q25.3	-0.198785	5.25114e-06	2.68755e-05
SNORC	2q37.1	-0.198738	5.27857e-06	2.7009e-05
LRFN2	6p21.2-p21.1	-0.198678	5.31424e-06	2.71842e-05
CTDP1	18q23	-0.198676	5.31554e-06	2.71842e-05
PHETA1	12q24.12	-0.198656	5.32705e-06	2.72361e-05
GID8	20q13.33	-0.198624	5.34626e-06	2.73273e-05
PROC	2q14.3	-0.198574	5.37574e-06	2.74569e-05
XYLT2	17q21.33	-0.198434	5.45996e-06	2.78231e-05
UBTF	17q21.31	-0.1984	5.48063e-06	2.79e-05
CDKN3	14q22.2	-0.198388	5.48809e-06	2.79308e-05
SCARNA16	17q25.2	-0.198328	5.52472e-06	2.8103e-05
TRPM2	21q22.3	-0.198309	5.53642e-06	2.81534e-05
BPIFB6	20q11.21	-0.198307	5.53745e-06	2.81534e-05
AQP12B	2q37.3	-0.198294	5.54563e-06	2.81796e-05
GINS3	16q21	-0.198292	5.54683e-06	2.81796e-05
HDAC10	22q13.33	-0.198281	5.55341e-06	2.82058e-05
MRTO4	1p36.13	-0.198209	5.59803e-06	2.84108e-05
PTS	11q23.1	-0.198202	5.60219e-06	2.84247e-05
EIF5A	17p13.1	-0.198093	5.6705e-06	2.87494e-05
FXR2	17p13.1	-0.198051	5.69708e-06	2.88695e-05
NEU4	2q37.3	-0.198013	5.72109e-06	2.89838e-05
TIA1	2p13.3	-0.197954	5.75834e-06	2.91578e-05
SOX4	6p22.3	-0.197928	5.77548e-06	2.92323e-05
SOX12	20p13	-0.197927	5.77598e-06	2.92323e-05
SHARPIN	8q24.3	-0.197858	5.8199e-06	2.94472e-05
RAPSN	11p11.2	-0.19782	5.84471e-06	2.95652e-05
PTPRVP	1q32.1	-0.19778	5.87057e-06	2.96735e-05
INAFM1	19q13.32	-0.197743	5.89476e-06	2.97853e-05
EOLA2	Xq28	-0.197741	5.89567e-06	2.97853e-05
NDUFA3	19q13.42	-0.197662	5.94765e-06	3.00176e-05
LYPD6B	2q23.2	-0.197652	5.95407e-06	3.00424e-05
PARP2	14q11.2	-0.197629	5.96968e-06	3.01059e-05
CBX2	17q25.3	-0.197611	5.98116e-06	3.01562e-05
ABRACL	6q24.1	-0.197584	5.99904e-06	3.02387e-05
YKT6	7p13	-0.197519	6.04249e-06	3.04271e-05
FANCD2	3p25.3	-0.197505	6.05172e-06	3.04582e-05
LAMTOR2	1q22	-0.19745	6.08882e-06	3.06295e-05
PRDX2	19p13.13	-0.197429	6.10291e-06	3.06926e-05
LRRC1	6p12.1	-0.197413	6.11351e-06	3.07382e-05
YJU2	19p13.3	-0.197377	6.13789e-06	3.0853e-05
E2F8	11p15.1	-0.197174	6.27722e-06	3.15217e-05
ISOC2	19q13.42	-0.197098	6.33004e-06	3.17471e-05
ZNF142	2q35	-0.197074	6.34667e-06	3.18111e-05
KRT18	12q13.13	-0.197073	6.34758e-06	3.18111e-05
TAL2	9q31.2	-0.196981	6.41189e-06	3.21254e-05
[truncated: 17,994 more rows]

## Sheet: PROTEINS 
proteins correlated to PTEN in https://www.cbioportal.org/results/coexpression?cancer_study_list=luad_tcga&Z_SCORE_THRESHOLD=2.0&RPPA_SCORE_THRESHOLD=2.0&profileFilter=mutations%2Cgistic%2Crppa_Zscores&case_set_id=luad_tcga_all&gene_list=PTEN&geneset_list=%20&tab_index=tab_visualize&Action=Submit
Correlated Gene	Cytoband	Spearman's Correlation	p-Value	q-Value
STMN1	1p36.11	-0.447832	2.09986e-19	2.44634e-17
CDH2	18q12.1	-0.439058	1.24205e-18	9.64658e-17
EIF4EBP1_PT70		-0.431395	5.62647e-18	3.27742e-16
MRE11	11q21	-0.408548	4.07538e-16	1.77287e-14
CHEK2_PT68		-0.407918	4.56534e-16	1.77287e-14
RAD51	15q15.1	-0.397804	2.73397e-15	9.10023e-14
CASP3	4q35.1	-0.396051	2.52495e-10	3.26841e-09
MET_PY1235		-0.350834	5.19161e-12	9.30496e-11
FOXM1	12p13.33	-0.349194	6.61331e-12	1.10064e-10
CASP9	1p36.21	-0.346875	4.18101e-08	2.86522e-07
CHEK1	11q24.2	-0.336112	4.33502e-11	5.94153e-10
ASNS	7q21.3	-0.314928	7.58768e-10	8.83965e-09
HSPA1A	6p21.33	-0.298795	5.79996e-09	5.40557e-08
BRCA2	13q13.1	-0.29867	2.85566e-06	1.12774e-05
ERBB3_PY1289		-0.297292	6.96576e-09	6.24239e-08
SERPINE1	7q22.1	-0.292099	1.30137e-08	1.03128e-07
CCND1	11q13.3	-0.291121	1.46197e-08	1.09883e-07
WWTR1	3q25.1	-0.280839	4.8363e-08	3.21959e-07
BID	22q11.21	-0.27881	6.08917e-08	3.66653e-07
BCL2L11	2q13	-0.278741	6.13711e-08	3.66653e-07
CDKN1B_PT198		-0.27775	6.86298e-08	3.91082e-07
NRAS	1p13.2	-0.275448	8.88375e-08	4.92836e-07
SMAD3	15q22.33	-0.275001	9.33765e-08	5.0597e-07
EZH2	7q36.1	-0.268315	2.84122e-05	9.32399e-05
CCNE2	8q22.1	-0.264458	2.94883e-07	1.46187e-06
BAK1	6p21.31	-0.263296	3.33711e-07	1.61989e-06
RPS6KB1_PT389		-0.254194	8.6203e-07	3.92842e-06
EIF4EBP1	8p11.23	-0.254029	8.76729e-07	3.92842e-06
TYMS	18p11.32	-0.250848	9.46401e-05	0.000294015
SRSF1	17q22	-0.250436	1.26234e-06	5.54953e-06
CASP7	10q25.3	-0.244901	2.18968e-06	8.95079e-06
CCNB1	5q13.2	-0.239008	3.8806e-06	1.50697e-05
PARP1	1q42.12	-0.232587	0.000304604	0.000747081
NFE2L2	2q31.2	-0.229698	0.000363515	0.000873184
PRDX1	1p34.1	-0.229388	9.57416e-06	3.43415e-05
TFRC	3q29	-0.228638	1.0256e-05	3.58951e-05
CDK1	10q21.2	-0.220344	2.16124e-05	7.40543e-05
LCN2	9q34.11	-0.213706	0.000929961	0.00214535
YWHAB	20q13.12	-0.202097	0.00010107	0.000305835
CCNE1	19q12	-0.200515	0.000114817	0.000342979
NOTCH1	9q34.3	-0.200248	0.000117304	0.000343653
PCNA	20p12.3	-0.200086	0.000118841	0.000343653
EIF4EBP1_PS65		-0.197168	0.000149894	0.000415777
G6PD	Xq28	-0.195999	0.000164341	0.000450487
TP53	17p13.1	-0.19337	0.000201768	0.000534226
IRS1	2q36.3	-0.192545	0.000215059	0.000557741
ETS1	11q24.3	-0.192522	0.000215437	0.000557741
RAF1_PS338		-0.19069	0.000248	0.000628087
CDKN2A	9p21.3	-0.186789	0.00390404	0.00723419
CDKN1B_PT157		-0.179596	0.000565836	0.0013453
STK11	19p13.3	-0.178558	0.000609758	0.00143509
XRCC1	19q13.31	-0.173188	0.000891999	0.00207836
SMAD4	18q21.2	-0.171637	0.000993559	0.0022696
CHGA	14q32.12	-0.167098	0.00996659	0.0168822
FN1	2q35	-0.166533	0.00140798	0.00312437
CD274	9p24.1	-0.160612	0.0133008	0.0221363
YWHAE	17p13.3	-0.15586	0.00282882	0.00574509
NRG1	8p12	-0.154606	0.00306207	0.00615053
IGFBP2	2q35	-0.151916	0.00362232	0.00693339
SCD	10q24.31	-0.151881	0.00363036	0.00693339
EGFR_PY1173		-0.151593	0.0036955	0.00696265
CHEK2	22q12.1	-0.15155	0.00370545	0.00696265
PEA15_PS116		-0.15067	0.00391205	0.00723419
MAPK8_PT183		-0.149955	0.00408767	0.00744083
MYC	8q24.21	-0.140048	0.00736969	0.0128145
ESR1	6q25.1-q25.2	-0.135577	0.00950602	0.0162861
FOXO3	6q21	-0.134674	0.0099989	0.0168822
CDKN1A	6p21.2	-0.130684	0.0124591	0.0208846
TIGAR	12p13.32	-0.128758	0.0138268	0.0228486
PDCD1	2q37.3	-0.124841	0.0549525	0.0820766
SETD2	3p21.31	-0.122536	0.0191883	0.0310477
E2F1	20q11.22	-0.120983	0.0629558	0.0920023
NDRG1_PT346		-0.116571	0.0259448	0.0408101
RAB11B	19p13.2	-0.105302	0.0443804	0.067463
RAB11A	15q22.31	-0.105302	0.0443804	0.067463
ACVRL1	12q13.13	-0.0978474	0.0618398	0.0911942
ADAR	1q21.3	-0.0970003	0.276049	0.355355
YWHAZ	8q22.3	-0.096799	0.0646979	0.0936311
COL6A1	21q22.3	-0.0841554	0.108467	0.153169
DIRAS3	1p31.3	-0.0681701	0.193795	0.264903
EIF4EBP1_PT37_T46		-0.0680758	0.194414	0.264903
ARAF_PS299		-0.0678533	0.19588	0.265349
MS4A1	11q12.2	-0.0660456	0.208086	0.280254
SNAI1	20q13.13	-0.0645793	0.218383	0.292433
PDK1	2q31.1	-0.0621941	0.235903	0.312268
BAX	19q13.33	-0.0620204	0.237217	0.312268
RB1_PS807_S811		-0.0573965	0.274087	0.35479
ERRFI1	1p36.23	-0.051902	0.322735	0.404287
CDH3	16q22.1	-0.044363	0.398076	0.483082
YBX1_PS102		-0.0438299	0.403775	0.486016
ERCC1	19q13.32	-0.0398677	0.447637	0.53214
KRT5	12q13.13	-0.0366838	0.574155	0.64573
BECN1	17q21.31	-0.0335684	0.522625	0.605829
AKT1_PT308		-0.0317344	0.545606	0.623168
AKT2_PT308		-0.0317344	0.545606	0.623168
AKT3_PT308		-0.0317344	0.545606	0.623168
AR	Xq12	-0.0301654	0.565655	0.642915
XBP1	22q12.1	-0.0293049	0.576798	0.64573
PEA15	1q23.2	-0.0287928	0.583477	0.64573
RICTOR_PT1135		-0.0286405	0.585471	0.64573
MSH6	2p16.3	-0.0286183	0.585761	0.64573
GAPDH	12p13.31	-0.0280406	0.593354	0.649068
FOXO3_PS318_S321		-0.0271599	0.605014	0.65873
PGR	11q22.1	-0.0226984	0.665582	0.711378
PECAM1	17q23.3	-0.0214326	0.683191	0.726865
MAP2K1_PS217_S221		-0.0206913	0.693586	0.734571
DIABLO	12q24.31	-0.0185453	0.723996	0.75987
BCL2	18q21.33	-0.017899	0.733243	0.766124
KIT	4q12	-0.0155107	0.767739	0.798586
COPS5	8q13.1	-0.0128868	0.885205	0.89287
CHEK1_PS345		-0.0126086	0.810276	0.835373
MACC1	7p21.1	-0.0109364	0.866993	0.883994
ESR1_PS118		-0.0069231	0.895132	0.89899
RPS6	9p22.1	0.00639969	0.90302	0.90302
EIF4E	4q23	0.00810344	0.877383	0.888827
SRC	20q11.23	0.00867448	0.868818	0.883994
YAP1	11q22.1	0.00921369	0.860744	0.883495
RAF1	3p25.2	0.0139104	0.791119	0.819247
CDKN1B	12p13.1	0.0186404	0.72264	0.75987
BCL2L1	20q11.21	0.0229906	0.661542	0.710319
FASN	17q25.3	0.0234	0.655898	0.70752
LCK	1p35.2	0.0262525	0.617133	0.6688
EEF2	19p13.3	0.0284833	0.587531	0.64573
CLDN7	17p13.1	0.0293715	0.575932	0.64573
PREX1	20q13.13	0.0343742	0.512688	0.597281
RB1	13q14.2	0.0351384	0.503353	0.59233
GATA3	10p14	0.0371112	0.479679	0.567336
SYK	9q22.2	0.0419135	0.424662	0.507416
SMAD1	4q31.21	0.046184	0.378975	0.467202
MSH2	2p21-p16.3	0.046236	0.378437	0.467202
ITGA2	5q11.2	0.0502042	0.338838	0.422189
AKT1S1_PT246		0.0521027	0.320866	0.404118
EGFR	7p11.2	0.0529701	0.312864	0.396182
ARID1A	1p36.11	0.0552033	0.397555	0.483082
MET	7q31	0.0564257	0.282298	0.359429
RPS6KA1_PT359_S363		0.0565876	0.280917	0.359429
CTNNA1	5q31.2	0.0590208	0.508118	0.594932
YBX1	1p34.2	0.0592222	0.259088	0.339144
INPP4B	4q31.21	0.0628836	0.23074	0.307213
AXL	19q13.2	0.0730278	0.262799	0.342079
MAP2K1	15q22.31	0.0730916	0.163472	0.226721
EIF4G1	3q27.1	0.0742824	0.404666	0.486016
RPS6_PS240_S244		0.0770132	0.141977	0.198087
SHC1_PY317		0.079763	0.128243	0.180004
ANXA7	10q22.2	0.0927988	0.0766173	0.108853
GSK3B	3q13.33	0.0958475	0.0673853	0.0963238
GSK3A	19q13.2	0.0958475	0.0673853	0.0963238
RPS6_PS235_S236		0.0973518	0.0631776	0.0920023
PARK7	1p36.23	0.0984858	0.0601509	0.0892685
SQSTM1	5q35.3	0.101355	0.053023	0.0797056
RPTOR	17q25.3	0.105199	0.0445893	0.067463
BIRC2	11q22.2	0.113983	0.0294603	0.0454586
PRKCD_PS664		0.115971	0.0267259	0.0415142
XRCC5	2q35	0.116452	0.0260974	0.0408101
BAP1	3p21.1	0.118113	0.0240265	0.0380828
GAB2	11q14.1	0.118584	0.0234655	0.0374483
RPS6KB1	17q23.1	0.119238	0.0227054	0.0364853
SRC_PY416		0.124794	0.0170633	0.0278025
STAT3_PY705		0.126991	0.0151963	0.0249348
PIK3CA	3q26.32	0.13691	0.00881815	0.0152195
CASP8	2q33.1	0.140853	0.00703447	0.0123235
ACACA	17q12	0.142111	0.00653734	0.0115394
RAD50	5q31.1	0.148351	0.00450774	0.00801759
GSK3A_PS9		0.149218	0.00427611	0.0076641
GSK3B_PS9		0.149218	0.00427611	0.0076641
MAPK1_PT202_Y204		0.152048	0.00359295	0.00693339
MAPK3_PT202_Y204		0.152048	0.00359295	0.00693339
MAPK1	22q11.22	0.15374	0.0032333	0.0063844
DVL3	3q27.1	0.153931	0.00319477	0.00636224
ERBB2_PY1248		0.155822	0.00283556	0.00574509
AKT1_PS473		0.160618	0.00208329	0.00433398
AKT2_PS473		0.160618	0.00208329	0.00433398
AKT3_PS473		0.160618	0.00208329	0.00433398
MYH9_PS1943		0.160927	0.0020418	0.00433398
RAB25	1q22	0.163461	0.00172848	0.00372903
TGM2	20q11.23	0.163818	0.00168805	0.00367585
ERBB3	12q13.2	0.165227	0.00153685	0.00337816
PRKAA1	5p13.1	0.166595	0.00140205	0.00312437
TUBA1B	12q13.12	0.169535	0.00114832	0.00259765
SYP	Xp11.23	0.186301	0.00400024	0.00733901
SRC_PY527		0.187735	0.000310361	0.000753272
GSK3A_PS21_S9		0.188863	0.000285015	0.000706474
GSK3B_PS21_S9		0.188863	0.000285015	0.000706474
VHL	3p25.3	0.191386	0.00023512	0.00060201
ACACA_PS79		0.195084	0.000176557	0.000472847
ACACB_PS79		0.195084	0.000176557	0.000472847
RET_PY905		0.195426	0.00251248	0.00518059
PIK3R2	19p13.11	0.199152	0.000128047	0.000359458
PIK3R1	5q13.1	0.199152	0.000128047	0.000359458
PDCD4	10q25.2	0.20002	0.000119467	0.000343653
TSC2_PT1462		0.202494	9.78732e-05	0.000300059
NFKB1_PS536		0.206984	6.77424e-05	0.000213297
BAD_PS112		0.214463	3.60531e-05	0.000115073
JUN_PS73		0.216134	3.12183e-05	0.000101026
RPS6KA1	1p36.11	0.218481	2.54537e-05	8.47246e-05
ATM	11q22.3	0.228568	1.03218e-05	3.58951e-05
TSC2	16p13.3	0.229381	9.58024e-06	3.43415e-05
EGFR_PY1068		0.230969	8.27515e-06	3.06049e-05
STAT5A	17q21.2	0.23231	7.30678e-06	2.74593e-05
ANXA1	9q21.13	0.234252	6.09331e-06	2.32744e-05
MYH11	16p13.11	0.244374	2.30616e-06	9.26439e-06
BRAF	7q34	0.245446	2.07525e-06	8.63453e-06
PRKCA_PS657		0.248379	1.55143e-06	6.57241e-06
NKX2-1	14q13.3	0.249056	1.44989e-06	6.256e-06
EEF2K	16p12.2	0.26198	3.83664e-07	1.82436e-06
YAP1_PS127		0.266883	2.27323e-07	1.15144e-06
KDR	4q12	0.267441	2.14037e-07	1.10824e-06
PXN	12q24.23	0.269856	1.64666e-07	8.71983e-07
TP63	3q28	0.271655	2.23546e-05	7.54874e-05
NF2	22q12.2	0.277726	6.8817e-08	3.91082e-07
MAPK14_PT180_Y182		0.279865	5.40321e-08	3.40256e-07
PRKCA	17q24.2	0.279962	5.34356e-08	3.40256e-07
PDK1_PS241		0.286012	2.66513e-08	1.88174e-07
RBM15	1p13.3	0.28645	2.53258e-08	1.84403e-07
CDH1	16q22.1	0.29193	1.32783e-08	1.03128e-07
MAPK9	5q35.3	0.293775	1.06511e-08	8.86326e-08
TSC1	9q34	0.295107	9.07533e-09	7.83167e-08
RICTOR	5p13.1	0.299241	5.4918e-09	5.33162e-08
MTOR_PS2448		0.299485	5.33016e-09	5.33162e-08
CAV1	7q31.2	0.305377	2.5675e-09	2.71921e-08
PRKCB_PS660		0.307855	1.8791e-09	2.08491e-08
KEAP1	19p13.2	0.313523	8.39859e-07	3.91374e-06
TP53BP1	15q15.3	0.31586	6.72087e-10	8.24191e-09
ERBB2	17q12	0.339962	2.51565e-11	3.66342e-10
MTOR	1p36.22	0.345565	1.12406e-11	1.74603e-10
AKT1	14q32.33	0.36109	1.10721e-12	2.14983e-11
AKT2	19q13.2	0.36109	1.10721e-12	2.14983e-11
AKT3	1q43-q44	0.36109	1.10721e-12	2.14983e-11
PRKAA1_PT172		0.368426	3.54187e-13	9.1695e-12
MAPK14	6p21.31	0.379498	5.9973e-14	1.74671e-12
CTNNB1	3p22.1	0.467895	2.95822e-21	6.89266e-19
Correlated Gene	Cytoband	Spearman's Correlation	p-Value	q-Value			proteins correlated to pten in https://www.cbioportal.org/results/coexpression?cancer_study_list=luad_tcga&Z_SCORE_THRESHOLD=2.0&RPPA_SCORE_THRESHOLD=2.0&profileFilter=mutations%2Cgistic%2Crppa_Zscores&case_set_id=luad_tcga_all&gene_list=PTEN&geneset_list=%20&tab_index=tab_visualize&Action=Submit

## Sheet: GSEA OF PROT NEG 
GSEA of proteins negatively correlated to PTEN in https://www.cbioportal.org/results/coexpression?cancer_study_list=luad_tcga&Z_SCORE_THRESHOLD=2.0&RPPA_SCORE_THRESHOLD=2.0&profileFilter=mutations%2Cgistic%2Crppa_Zscores&case_set_id=luad_tcga_all&gene_list=PTEN&geneset_list=%20&tab_index=tab_visualize&Action=Submit
https://www.gsea-msigdb.org/gsea/msigdb/human/compute_overlaps.jsp
Overlap Results
Collection(s):	H
# overlaps shown:	10
# genesets in collections:	50
# genes in comparison (n):	58
# genes in universe (N):	42722
Gene Set Name	# Genes in Gene Set (K)	Description	# Genes in Overlap (k)	k/K	p-value	FDR q-value
HALLMARK_E2F_TARGETS	200	Genes encoding cell cycle related targets of E2F transcription factors.	15	0.075	1.66e-22	8.31e-21
HALLMARK_G2M_CHECKPOINT	200	Genes involved in the G2/M checkpoint, as in progression through the cell division cycle.	9	0.045	7.87e-12	1.97e-10
HALLMARK_UV_RESPONSE_UP	158	Genes up-regulated in response to ultraviolet (UV) radiation.	8	0.0506	4.8e-11	7.99e-10
HALLMARK_APOPTOSIS	161	Genes mediating programmed cell death (apoptosis) by activation of caspases.	7	0.0435	2.42e-09	3.03e-08
HALLMARK_P53_PATHWAY	200	Genes involved in p53 pathways and networks.	7	0.035	1.09e-08	1.09e-07
HALLMARK_COMPLEMENT	200	Genes encoding components of the complement system, which is part of the innate immune system.	6	0.03	3.23e-07	2.02e-06
HALLMARK_MTORC1_SIGNALING	200	Genes up-regulated through activation of mTORC1 complex.	6	0.03	3.23e-07	2.02e-06
HALLMARK_TNFA_SIGNALING_VIA_NFKB	200	Genes regulated by NF-kB in response to TNF [GeneID=7124].	6	0.03	3.23e-07	2.02e-06
HALLMARK_MYC_TARGETS_V1	200	A subgroup of genes regulated by MYC - version 1 (v1).	5	0.025	8.01e-06	4.45e-05
HALLMARK_WNT_BETA_CATENIN_SIGNALING	42	Genes up-regulated by activation of WNT signaling through accumulation of beta catenin CTNNB1 [GeneID=1499].	3	0.0714	2.63e-05	0.000131
Gene/Gene Set Overlap Matrix
Entrez Gene Id	Gene Symbol	Gene Description	HALLMARK_E2F_TARGETS	HALLMARK_G2M_CHECKPOINT	HALLMARK_UV_RESPONSE_UP	HALLMARK_APOPTOSIS	HALLMARK_P53_PATHWAY	HALLMARK_COMPLEMENT	HALLMARK_MTORC1_SIGNALING	HALLMARK_TNFA_SIGNALING_VIA_NFKB	HALLMARK_MYC_TARGETS_V1	HALLMARK_WNT_BETA_CATENIN_SIGNALING
4609	MYC	MYC proto-oncogene, bHLH transcription factor [Source:HGNC Symbol;Acc:HGNC:7553]	HALLMARK_E2F_TARGETS	HALLMARK_G2M_CHECKPOINT						HALLMARK_TNFA_SIGNALING_VIA_NFKB	HALLMARK_MYC_TARGETS_V1	HALLMARK_WNT_BETA_CATENIN_SIGNALING
6426	SRSF1	serine and arginine rich splicing factor 1 [Source:HGNC Symbol;Acc:HGNC:10780]	HALLMARK_E2F_TARGETS	HALLMARK_G2M_CHECKPOINT							HALLMARK_MYC_TARGETS_V1
983	CDK1	cyclin dependent kinase 1 [Source:HGNC Symbol;Acc:HGNC:1722]	HALLMARK_E2F_TARGETS	HALLMARK_G2M_CHECKPOINT
675	BRCA2	BRCA2 DNA repair associated [Source:HGNC Symbol;Acc:HGNC:1101]	HALLMARK_E2F_TARGETS	HALLMARK_G2M_CHECKPOINT
3925	STMN1	stathmin 1 [Source:HGNC Symbol;Acc:HGNC:6510]	HALLMARK_E2F_TARGETS	HALLMARK_G2M_CHECKPOINT
2146	EZH2	enhancer of zeste 2 polycomb repressive complex 2 subunit [Source:HGNC Symbol;Acc:HGNC:3527]	HALLMARK_E2F_TARGETS	HALLMARK_G2M_CHECKPOINT
1111	CHEK1	checkpoint kinase 1 [Source:HGNC Symbol;Acc:HGNC:1925]	HALLMARK_E2F_TARGETS	HALLMARK_G2M_CHECKPOINT
7037	TFRC	transferrin receptor [Source:HGNC Symbol;Acc:HGNC:11763]	HALLMARK_E2F_TARGETS		HALLMARK_UV_RESPONSE_UP				HALLMARK_MTORC1_SIGNALING
898	CCNE1	cyclin E1 [Source:HGNC Symbol;Acc:HGNC:1589]	HALLMARK_E2F_TARGETS		HALLMARK_UV_RESPONSE_UP
1026	CDKN1A	cyclin dependent kinase inhibitor 1A [Source:HGNC Symbol;Acc:HGNC:1784]	HALLMARK_E2F_TARGETS			HALLMARK_APOPTOSIS	HALLMARK_P53_PATHWAY		HALLMARK_MTORC1_SIGNALING	HALLMARK_TNFA_SIGNALING_VIA_NFKB
5111	PCNA	proliferating cell nuclear antigen [Source:HGNC Symbol;Acc:HGNC:8729]	HALLMARK_E2F_TARGETS				HALLMARK_P53_PATHWAY				HALLMARK_MYC_TARGETS_V1
7157	TP53	tumor protein p53 [Source:HGNC Symbol;Acc:HGNC:11998]	HALLMARK_E2F_TARGETS				HALLMARK_P53_PATHWAY					HALLMARK_WNT_BETA_CATENIN_SIGNALING
1029	CDKN2A	cyclin dependent kinase inhibitor 2A [Source:HGNC Symbol;Acc:HGNC:1787]	HALLMARK_E2F_TARGETS				HALLMARK_P53_PATHWAY
11200	CHEK2	checkpoint kinase 2 [Source:HGNC Symbol;Acc:HGNC:16627]	HALLMARK_E2F_TARGETS
4361	MRE11	MRE11 homolog, double strand break repair nuclease [Source:HGNC Symbol;Acc:HGNC:7230]	HALLMARK_E2F_TARGETS
595	CCND1	cyclin D1 [Source:HGNC Symbol;Acc:HGNC:1582]		HALLMARK_G2M_CHECKPOINT		HALLMARK_APOPTOSIS				HALLMARK_TNFA_SIGNALING_VIA_NFKB
4088	SMAD3	SMAD family member 3 [Source:HGNC Symbol;Acc:HGNC:6769]		HALLMARK_G2M_CHECKPOINT						HALLMARK_TNFA_SIGNALING_VIA_NFKB
836	CASP3	caspase 3 [Source:HGNC Symbol;Acc:HGNC:1504]			HALLMARK_UV_RESPONSE_UP	HALLMARK_APOPTOSIS		HALLMARK_COMPLEMENT
10018	BCL2L11	BCL2 like 11 [Source:HGNC Symbol;Acc:HGNC:994]			HALLMARK_UV_RESPONSE_UP	HALLMARK_APOPTOSIS
637	BID	BH3 interacting domain death agonist [Source:HGNC Symbol;Acc:HGNC:1050]			HALLMARK_UV_RESPONSE_UP	HALLMARK_APOPTOSIS
578	BAK1	BCL2 antagonist/killer 1 [Source:HGNC Symbol;Acc:HGNC:949]			HALLMARK_UV_RESPONSE_UP		HALLMARK_P53_PATHWAY
440	ASNS	asparagine synthetase (glutamine-hydrolyzing) [Source:HGNC Symbol;Acc:HGNC:753]			HALLMARK_UV_RESPONSE_UP				HALLMARK_MTORC1_SIGNALING
3485	IGFBP2	insulin like growth factor binding protein 2 [Source:HGNC Symbol;Acc:HGNC:5471]			HALLMARK_UV_RESPONSE_UP
840	CASP7	caspase 7 [Source:HGNC Symbol;Acc:HGNC:1508]				HALLMARK_APOPTOSIS		HALLMARK_COMPLEMENT
842	CASP9	caspase 9 [Source:HGNC Symbol;Acc:HGNC:1511]				HALLMARK_APOPTOSIS		HALLMARK_COMPLEMENT
4851	NOTCH1	notch receptor 1 [Source:HGNC Symbol;Acc:HGNC:7881]					HALLMARK_P53_PATHWAY					HALLMARK_WNT_BETA_CATENIN_SIGNALING
2309	FOXO3	forkhead box O3 [Source:HGNC Symbol;Acc:HGNC:3821]					HALLMARK_P53_PATHWAY
5054	SERPINE1	serpin family E member 1 [Source:HGNC Symbol;Acc:HGNC:8583]						HALLMARK_COMPLEMENT		HALLMARK_TNFA_SIGNALING_VIA_NFKB
2335	FN1	fibronectin 1 [Source:HGNC Symbol;Acc:HGNC:3778]						HALLMARK_COMPLEMENT
3303	HSPA1A	heat shock protein family A (Hsp70) member 1A [Source:HGNC Symbol;Acc:HGNC:5232]						HALLMARK_COMPLEMENT
6319	SCD	stearoyl-CoA desaturase [Source:HGNC Symbol;Acc:HGNC:10571]							HALLMARK_MTORC1_SIGNALING
2539	G6PD	glucose-6-phosphate dehydrogenase [Source:HGNC Symbol;Acc:HGNC:4057]							HALLMARK_MTORC1_SIGNALING
5052	PRDX1	peroxiredoxin 1 [Source:HGNC Symbol;Acc:HGNC:9352]							HALLMARK_MTORC1_SIGNALING
4780	NFE2L2	NFE2 like bZIP transcription factor 2 [Source:HGNC Symbol;Acc:HGNC:7782]								HALLMARK_TNFA_SIGNALING_VIA_NFKB
7298	TYMS	thymidylate synthetase [Source:HGNC Symbol;Acc:HGNC:12441]									HALLMARK_MYC_TARGETS_V1
7531	YWHAE	tyrosine 3-monooxygenase/tryptophan 5-monooxygenase activation protein epsilon [Source:HGNC Symbol;Acc:HGNC:12851]									HALLMARK_MYC_TARGETS_V1
3667	IRS1	insulin receptor substrate 1 [Source:HGNC Symbol;Acc:HGNC:6125]
5888	RAD51	RAD51 recombinase [Source:HGNC Symbol;Acc:HGNC:9817]
25937	WWTR1	WW domain containing transcription regulator 1 [Source:HGNC Symbol;Acc:HGNC:24042]
1000	CDH2	cadherin 2 [Source:HGNC Symbol;Acc:HGNC:1759]
2113	ETS1	ETS proto-oncogene 1, transcription factor [Source:HGNC Symbol;Acc:HGNC:3488]
29126	CD274	CD274 molecule [Source:HGNC Symbol;Acc:HGNC:17635]
7529	YWHAB	tyrosine 3-monooxygenase/tryptophan 5-monooxygenase activation protein beta [Source:HGNC Symbol;Acc:HGNC:12849]
1978	EIF4EBP1	eukaryotic translation initiation factor 4E binding protein 1 [Source:HGNC Symbol;Acc:HGNC:3288]
2099	ESR1	estrogen receptor 1 [Source:HGNC Symbol;Acc:HGNC:3467]
1113	CHGA	chromogranin A [Source:HGNC Symbol;Acc:HGNC:1929]
142	PARP1	poly(ADP-ribose) polymerase 1 [Source:HGNC Symbol;Acc:HGNC:270]
2305	FOXM1	forkhead box M1 [Source:HGNC Symbol;Acc:HGNC:3818]
29072	SETD2	SET domain containing 2, histone lysine methyltransferase [Source:HGNC Symbol;Acc:HGNC:18420]
3084	NRG1	neuregulin 1 [Source:HGNC Symbol;Acc:HGNC:7997]
3934	LCN2	lipocalin 2 [Source:HGNC Symbol;Acc:HGNC:6526]
4089	SMAD4	SMAD family member 4 [Source:HGNC Symbol;Acc:HGNC:6770]
4893	NRAS	NRAS proto-oncogene, GTPase [Source:HGNC Symbol;Acc:HGNC:7989]
57103	TIGAR	TP53 induced glycolysis regulatory phosphatase [Source:HGNC Symbol;Acc:HGNC:1185]
6794	STK11	serine/threonine kinase 11 [Source:HGNC Symbol;Acc:HGNC:11389]
7515	XRCC1	X-ray repair cross complementing 1 [Source:HGNC Symbol;Acc:HGNC:12828]
891	CCNB1	cyclin B1 [Source:HGNC Symbol;Acc:HGNC:1579]
9134	CCNE2	cyclin E2 [Source:HGNC Symbol;Acc:HGNC:1590]
